# Supplementary material for: Impact of COVID-19 on acute trauma and orthopaedic referrals and surgery in the UK during the first wave of the pandemic: a multicentre observational study from the COVid Emergency-Related Trauma and orthopaedics (COVERT) Collaborative
Source: PubMed Central journal article supplement (PMC8771810; doi:10.1136/bmjopen-2021-054919), 2022-01-18
Supplement: bmjopen-2021-054919.draft_revisions.pdf [file bmjopen-2021-054919.draft_revisions.pdf]

# BMJ Open

BMJ Open is committed to open peer review. As part of this commitment we make the peer review history of every article we publish publicly available.

When an article is published we post the peer reviewers' comments and the authors' responses online. We also post the versions of the paper that were used during peer review. These are the versions that the peer review comments apply to.

The versions of the paper that follow are the versions that were submitted during the peer review process. They are not the versions of record or the final published versions. They should not be cited or distributed as the published version of this manuscript.

BMJ Open is an open access journal and the full, final, typeset and author-corrected version of record of the manuscript is available on our site with no access controls, subscription charges or pay-per-view fees (<http://bmjopen.bmj.com>).

If you have any questions on BMJ Open's open peer review process please email [info.bmjopen@bmj.com](mailto:info.bmjopen@bmj.com)

# BMJ Open

**The impact of COVID-19 on acute Trauma and Orthopaedic referrals and surgery in the UK during the 'peak weeks': lessons learnt from the largest and longest national multi-centre observational study.**

|                               |                                                                                                                                                                                                                                                                                             |
|-------------------------------|---------------------------------------------------------------------------------------------------------------------------------------------------------------------------------------------------------------------------------------------------------------------------------------------|
| Journal:                      | <i>BMJ Open</i>                                                                                                                                                                                                                                                                             |
| Manuscript ID                 | bmjopen-2021-054919                                                                                                                                                                                                                                                                         |
| Article Type:                 | Original research                                                                                                                                                                                                                                                                           |
| Date Submitted by the Author: | 03-Jul-2021                                                                                                                                                                                                                                                                                 |
| Complete List of Authors:     | Sugand, Kapil; Imperial College London, MSk Lab<br>Aframian, Arash; Imperial College London, MSk Lab<br>Park, Chang; Imperial College London, Trauma and orthopaedics<br>Collaborative, COVERT; Imperial College London<br>Sarraf, Khaled; Imperial College London, Trauma and Orthopaedics |
| Keywords:                     | COVID-19, TRAUMA MANAGEMENT, ORTHOPAEDIC & TRAUMA SURGERY, EPIDEMIOLOGY                                                                                                                                                                                                                     |
|                               |                                                                                                                                                                                                                                                                                             |

SCHOLARONE™  
Manuscripts

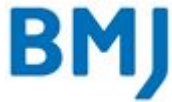

I, the Submitting Author has the right to grant and does grant on behalf of all authors of the Work (as defined in the below author licence), an exclusive licence and/or a non-exclusive licence for contributions from authors who are: i) UK Crown employees; ii) where BMJ has agreed a CC-BY licence shall apply, and/or iii) in accordance with the terms applicable for US Federal Government officers or employees acting as part of their official duties; on a worldwide, perpetual, irrevocable, royalty-free basis to BMJ Publishing Group Ltd ("BMJ") its licensees and where the relevant Journal is co-owned by BMJ to the co-owners of the Journal, to publish the Work in this journal and any other BMJ products and to exploit all rights, as set out in our [licence](#).

The Submitting Author accepts and understands that any supply made under these terms is made by BMJ to the Submitting Author unless you are acting as an employee on behalf of your employer or a postgraduate student of an affiliated institution which is paying any applicable article publishing charge ("APC") for Open Access articles. Where the Submitting Author wishes to make the Work available on an Open Access basis (and intends to pay the relevant APC), the terms of reuse of such Open Access shall be governed by a Creative Commons licence – details of these licences and which [Creative Commons](#) licence will apply to this Work are set out in our licence referred to above.

Other than as permitted in any relevant BMJ Author's Self Archiving Policies, I confirm this Work has not been accepted for publication elsewhere, is not being considered for publication elsewhere and does not duplicate material already published. I confirm all authors consent to publication of this Work and authorise the granting of this licence.

1 The impact of COVID-19 on acute Trauma and Orthopaedic referrals and surgery in the UK  
 2 during the ‘peak weeks’: lessons learnt from the largest and longest national multi-centre  
 3 observational study.

4  
 5 The COVID-Emergency Related Trauma and orthopaedics (COVERT) Collaborative

6  
 7  
 8 Core authorship committee

9

| Name                                                                                                                                                                                                                                                                                                                                                                                                                                                                                                                                                                                                                                                             | Role                                                            | Qualification | Contribution                                                                                                                                                                                                                                                                                                                                                                      | E-mail                                                                                              |
|------------------------------------------------------------------------------------------------------------------------------------------------------------------------------------------------------------------------------------------------------------------------------------------------------------------------------------------------------------------------------------------------------------------------------------------------------------------------------------------------------------------------------------------------------------------------------------------------------------------------------------------------------------------|-----------------------------------------------------------------|---------------|-----------------------------------------------------------------------------------------------------------------------------------------------------------------------------------------------------------------------------------------------------------------------------------------------------------------------------------------------------------------------------------|-----------------------------------------------------------------------------------------------------|
| <p>10<br/>11<br/>12<br/>13<br/>14<br/>15<br/>16<br/>17<br/>18<br/>19<br/>20<br/>21<br/>22<br/>23<br/>24<br/>25<br/>26<br/>27<br/>28<br/>29<br/>30<br/>31<br/>32<br/>33<br/>34<br/>35<br/>36<br/>37<br/>38<br/>39<br/>40<br/>41<br/>42<br/>43<br/>44<br/>45<br/>46<br/>47<br/>48</p> <p><b>Kapil Sugand</b><br/>           Primary &amp;<br/>           corresponding<br/>           author<br/> <i>58 Thames<br/>           Avenue,<br/>           Greenford,<br/>           Middlesex,<br/>           UB6 8JN</i><br/>           E:<br/> <a href="mailto:ks704@ic.ac.uk">ks704@ic.ac.uk</a><br/>           T:<br/>           004477736428<br/>           13</p> | <p>T&amp;O<br/>           Specialist<br/>           Trainee</p> | <p>MRCS</p>   | <ul style="list-style-type: none"> <li>• Conceptualisation</li> <li>• Data curation</li> <li>• Formal analysis</li> <li>• Investigation</li> <li>• Methodology</li> <li>• Project administration</li> <li>• Resources</li> <li>• Supervise</li> <li>• Validation</li> <li>• Visualisation</li> <li>• Writing original draft</li> <li>• Writing – reviewing and editing</li> </ul> | <p><a href="mailto:Ks704@ic.ac.uk">Ks704@ic.ac.uk</a><br/>           ORCID: 0000-0003-3185-954X</p> |
| <p>49<br/>50<br/>51<br/>52<br/>53<br/>54<br/>55<br/>56<br/>57<br/>58<br/>59<br/>60</p> <p>Arash<br/>           Aframian</p>                                                                                                                                                                                                                                                                                                                                                                                                                                                                                                                                      | <p>T&amp;O<br/>           Specialist<br/>           Trainee</p> | <p>MRCS</p>   | <ul style="list-style-type: none"> <li>• Conceptualisation</li> <li>• Formal analysis</li> <li>• Investigation</li> <li>• Methodology</li> <li>• Supervise</li> </ul>                                                                                                                                                                                                             | <p><a href="mailto:arash.aframian@gmail.com">arash.aframian@gmail.com</a></p>                       |

|                                 |                        |      |                                                                                                                                                                                                                                              |                                                                  |
|---------------------------------|------------------------|------|----------------------------------------------------------------------------------------------------------------------------------------------------------------------------------------------------------------------------------------------|------------------------------------------------------------------|
|                                 |                        |      | <ul style="list-style-type: none"> <li>• Writing – reviewing and editing</li> </ul>                                                                                                                                                          |                                                                  |
| Chang Park                      | T&O Specialist Trainee | MRCS | <ul style="list-style-type: none"> <li>• Conceptualisation</li> <li>• Methodology</li> <li>• Supervise</li> <li>• Writing – reviewing and editing</li> </ul>                                                                                 | <a href="mailto:changpark3@gmail.com">changpark3@gmail.com</a>   |
| Khaled M Sarraf (senior author) | T&O Consultant         | FRCS | <ul style="list-style-type: none"> <li>• Conceptualisation</li> <li>• Investigation</li> <li>• Methodology</li> <li>• Project administration</li> <li>• Resources</li> <li>• Supervise</li> <li>• Writing – reviewing and editing</li> </ul> | <a href="mailto:khaled.sarraf@nhs.net">khaled.sarraf@nhs.net</a> |

### COVERT Collaborators

#### 1. Department of Trauma and Orthopaedics, Imperial College Healthcare NHS Trust, London, W2 1NY, England

| Name           | Role                  | Qualification | Contribution                                                                                                      | E-mail                                                             |
|----------------|-----------------------|---------------|-------------------------------------------------------------------------------------------------------------------|--------------------------------------------------------------------|
| Thomas Ashdown | Core Surgical Trainee | MRCS          | <ul style="list-style-type: none"> <li>• Data curation</li> <li>• Formal analysis</li> <li>• Resources</li> </ul> | <a href="mailto:thomas.ashdown@nhs.net">thomas.ashdown@nhs.net</a> |
| Ramla Ali      | Foundation Doctor     | MBBS          | <ul style="list-style-type: none"> <li>• Data curation</li> <li>• Formal analysis</li> <li>• Resources</li> </ul> | <a href="mailto:ramla.ali@nhs.net">ramla.ali@nhs.net</a>           |

|                       |                   |      |                                                                                                                      |                                                                                  |
|-----------------------|-------------------|------|----------------------------------------------------------------------------------------------------------------------|----------------------------------------------------------------------------------|
| William Harland       | Foundation Doctor | MBBS | <ul style="list-style-type: none"> <li>• Data curation</li> <li>• Formal analysis</li> <li>• Resources</li> </ul>    | <a href="mailto:william.harland@nhs.net">william.harland@nhs.net</a>             |
| Charles Hallett       | Foundation Doctor | MBBS | <ul style="list-style-type: none"> <li>• Data curation</li> <li>• Formal analysis</li> <li>• Resources</li> </ul>    | <a href="mailto:Ortho@pansurg.org">Ortho@pansurg.org</a>                         |
| Chinmay Gupte         | T&O Consultant    | FRCS | <ul style="list-style-type: none"> <li>• Project administration</li> <li>• Resources</li> <li>• Supervise</li> </ul> | <a href="mailto:c.gupte00@ic.ac.uk">c.gupte00@ic.ac.uk</a>                       |
| Dominic Spicer        | T&O Consultant    | FRCS | <ul style="list-style-type: none"> <li>• Project administration</li> <li>• Resources</li> <li>• Supervise</li> </ul> | <a href="mailto:dominic.spicer@nhs.net">dominic.spicer@nhs.net</a>               |
| Robin Strachan        | T&O Consultant    | FRCS | <ul style="list-style-type: none"> <li>• Project administration</li> <li>• Resources</li> <li>• Supervise</li> </ul> | <a href="mailto:robin.strachan@nhs.net">robin.strachan@nhs.net</a>               |
| Dinesh Nathwani       | T&O Consultant    | FRCS | <ul style="list-style-type: none"> <li>• Project administration</li> <li>• Resources</li> <li>• Supervise</li> </ul> | <a href="mailto:d.nathwani@imperial.ac.uk">d.nathwani@imperial.ac.uk</a>         |
| Rajarshi Bhattacharya | T&O Consultant    | FRCS | <ul style="list-style-type: none"> <li>• Project administration</li> <li>• Resources</li> <li>• Supervise</li> </ul> | <a href="mailto:rajarshi.bhattacharya@nhs.net">rajarshi.bhattacharya@nhs.net</a> |

17

18

1  
2  
3  
4 19 **2. Department of Trauma and Orthopaedics, Chelsea and Westminster Hospital NHS**  
5  
6 20 **Foundation Trust, London, SW10 9NH, England**

| Name                    | Role                         | Qualification | Contribution                                                                                                                                        | E-mail                                                                     |
|-------------------------|------------------------------|---------------|-----------------------------------------------------------------------------------------------------------------------------------------------------|----------------------------------------------------------------------------|
| Catrin Morgan           | T&O<br>Specialist<br>Trainee | MRCS          | <ul style="list-style-type: none"> <li>• Data curation</li> <li>• Formal analysis</li> <li>• Project administration</li> <li>• Supervise</li> </ul> | <a href="mailto:catrin.morgan@nhs.net">catrin.morgan@nhs.net</a>           |
| Katharine Bennett-Brown | Core<br>Surgical<br>Trainee  | MRCS          | <ul style="list-style-type: none"> <li>• Data curation</li> <li>• Formal analysis</li> <li>• Resources</li> </ul>                                   | <a href="mailto:katebennettbrown@gmail.com">katebennettbrown@gmail.com</a> |
| Henry Simon             | T&O<br>Specialist<br>Trainee | MRCS          | <ul style="list-style-type: none"> <li>• Data curation</li> <li>• Formal analysis</li> <li>• Resources</li> </ul>                                   | <a href="mailto:henrysimon@hotmail.co.uk">henrysimon@hotmail.co.uk</a>     |
| Rupen Dattani           | T&O<br>Consultant            | FRCS          | <ul style="list-style-type: none"> <li>• Project administration</li> <li>• Resources</li> <li>• Supervise</li> </ul>                                | <a href="mailto:rupen.dattani@nhs.net">rupen.dattani@nhs.net</a>           |

21  
22 **3. Department of Trauma and Orthopaedics, Queen Elizabeth Hospital, Gateshead**  
23 **Health NHS Foundation Trust, Gateshead, NE9 6SX, England**

| Name            | Role                         | Qualification | Contribution                                                                                                                                        | E-mail                                                                 |
|-----------------|------------------------------|---------------|-----------------------------------------------------------------------------------------------------------------------------------------------------|------------------------------------------------------------------------|
| Adham Mousa     | T&O<br>Specialist<br>Trainee | MRCS          | <ul style="list-style-type: none"> <li>• Data curation</li> <li>• Formal analysis</li> <li>• Project administration</li> <li>• Supervise</li> </ul> | <a href="mailto:adham.mousa@nhs.net">adham.mousa@nhs.net</a>           |
| Karen Vejsbjerg | Core<br>Surgical<br>Trainee  | MRCS          | <ul style="list-style-type: none"> <li>• Data curation</li> <li>• Formal analysis</li> <li>• Resources</li> </ul>                                   | <a href="mailto:karen.vejsbjerg1@nhs.net">karen.vejsbjerg1@nhs.net</a> |
| Michael Zhang   | Foundation<br>Doctor         | MBBS          | <ul style="list-style-type: none"> <li>• Data curation</li> <li>• Formal analysis</li> </ul>                                                        | <a href="mailto:michael.zhang1@nhs.net">michael.zhang1@nhs.net</a>     |

|                 |                      |      |                                                                                                                      |                                                                      |
|-----------------|----------------------|------|----------------------------------------------------------------------------------------------------------------------|----------------------------------------------------------------------|
|                 |                      |      | <ul style="list-style-type: none"> <li>• Resources</li> </ul>                                                        |                                                                      |
| Vikas Kumar     | Foundation<br>Doctor | MBBS | <ul style="list-style-type: none"> <li>• Data curation</li> <li>• Formal analysis</li> <li>• Resources</li> </ul>    | <a href="mailto:vikas.kumar7@nhs.net">vikas.kumar7@nhs.net</a>       |
| Hannah Emerson  | Foundation<br>Doctor | MBBS | <ul style="list-style-type: none"> <li>• Data curation</li> <li>• Formal analysis</li> <li>• Resources</li> </ul>    | <a href="mailto:hannah.emerson2@nhs.net">hannah.emerson2@nhs.net</a> |
| Andrew Oliver   | Foundation<br>Doctor | MBBS | <ul style="list-style-type: none"> <li>• Data curation</li> <li>• Formal analysis</li> <li>• Resources</li> </ul>    | <a href="mailto:andrew.oliver2@nhs.net">andrew.oliver2@nhs.net</a>   |
| Callum Smith    | Foundation<br>Doctor | MBBS | <ul style="list-style-type: none"> <li>• Data curation</li> <li>• Formal analysis</li> <li>• Resources</li> </ul>    | <a href="mailto:callum.smith8@nhs.net">callum.smith8@nhs.net</a>     |
| Andreas Hinsche | T&O<br>Consultant    | FRCS | <ul style="list-style-type: none"> <li>• Project administration</li> <li>• Resources</li> <li>• Supervise</li> </ul> | <a href="mailto:a.hinsche@nhs.net">a.hinsche@nhs.net</a>             |

24

25 **4. Department of Trauma and Orthopaedics, Darent Valley Hospital, Dartford and**  
 26 **Gravesham NHS Trust, Dartford, DA2 8DA, England**

| Name                | Role                         | Qualification | Contribution                                                                                                                                        | E-mail                                                                   |
|---------------------|------------------------------|---------------|-----------------------------------------------------------------------------------------------------------------------------------------------------|--------------------------------------------------------------------------|
| Markus L Sagmeister | T&O<br>Specialist<br>Trainee | MRCS          | <ul style="list-style-type: none"> <li>• Data curation</li> <li>• Formal analysis</li> <li>• Project administration</li> <li>• Supervise</li> </ul> | <a href="mailto:markus.sagmeister@nhs.net">markus.sagmeister@nhs.net</a> |
| Gihan Jayasinghe    | T&O<br>Specialist<br>Trainee | MRCS          | <ul style="list-style-type: none"> <li>• Data curation</li> <li>• Formal analysis</li> <li>• Resources</li> </ul>                                   | <a href="mailto:gihan.jayasinghe@nhs.net">gihan.jayasinghe@nhs.net</a>   |
| Marissa Lewis       | Foundation<br>Doctor         | MBBS          | <ul style="list-style-type: none"> <li>• Data curation</li> </ul>                                                                                   | <a href="mailto:marissa.lewis2@nhs.net">marissa.lewis2@nhs.net</a>       |



|               |                   |      |                                                                                                                   |                                                                  |
|---------------|-------------------|------|-------------------------------------------------------------------------------------------------------------------|------------------------------------------------------------------|
|               |                   |      | <ul style="list-style-type: none"> <li>• Formal analysis</li> <li>• Resources</li> </ul>                          |                                                                  |
| Michael Avery | Foundation Doctor | MBBS | <ul style="list-style-type: none"> <li>• Data curation</li> <li>• Formal analysis</li> <li>• Resources</li> </ul> | <a href="mailto:michael.avery@nhs.net">michael.avery@nhs.net</a> |

27

28

29

**5. Department of Trauma and Orthopaedics, Royal Berkshire NHS Foundation Trust, Reading, RG1 5AN, England**

| Name            | Role                   | Qualification | Contribution                                                                                                                                        | E-mail                                                                   |
|-----------------|------------------------|---------------|-----------------------------------------------------------------------------------------------------------------------------------------------------|--------------------------------------------------------------------------|
| Tariq Aboelmagd | T&O Specialist Trainee | MRCS          | <ul style="list-style-type: none"> <li>• Data curation</li> <li>• Formal analysis</li> <li>• Project administration</li> <li>• Supervise</li> </ul> | <a href="mailto:taboelmagd@doctors.org.uk">taboelmagd@doctors.org.uk</a> |
| Shireen Ibish   | T&O Specialist Trainee | MRCS          | <ul style="list-style-type: none"> <li>• Data curation</li> <li>• Formal analysis</li> <li>• Resources</li> </ul>                                   | <a href="mailto:shireen.ibish@nhs.net">shireen.ibish@nhs.net</a>         |
| Ruben Thumbadoo | Core Surgical Trainee  | MRCS          | <ul style="list-style-type: none"> <li>• Data curation</li> <li>• Formal analysis</li> <li>• Resources</li> </ul>                                   | <a href="mailto:ruben.thumbadoo@nhs.net">ruben.thumbadoo@nhs.net</a>     |
| Asanka Wijendra | T&O Specialist Trainee | MRCS          | <ul style="list-style-type: none"> <li>• Data curation</li> <li>• Formal analysis</li> <li>• Resources</li> </ul>                                   | <a href="mailto:awijendra@gmail.com">awijendra@gmail.com</a>             |
| Joseph Dixon    | T&O Specialist Trainee | MRCS          | <ul style="list-style-type: none"> <li>• Data curation</li> <li>• Formal analysis</li> <li>• Resources</li> </ul>                                   | <a href="mailto:joedixon@doctors.org.uk">joedixon@doctors.org.uk</a>     |

|              |                              |      |                                                                                                                   |                                                                |
|--------------|------------------------------|------|-------------------------------------------------------------------------------------------------------------------|----------------------------------------------------------------|
| Vatsal Gupta | T&O<br>Specialist<br>Trainee | MRCS | <ul style="list-style-type: none"> <li>• Data curation</li> <li>• Formal analysis</li> <li>• Resources</li> </ul> | <a href="mailto:vatsalg001@gmail.com">vatsalg001@gmail.com</a> |
|--------------|------------------------------|------|-------------------------------------------------------------------------------------------------------------------|----------------------------------------------------------------|

30

31 **6. Department of Trauma and Orthopaedics, James Cook University Hospital, South**  
 32 **Tees NHS Foundation Trust, Middlesbrough, TS4 3BW, England**

| Name                 | Role                  | Qualification | Contribution                                                                                                                                        | E-mail                                                             |
|----------------------|-----------------------|---------------|-----------------------------------------------------------------------------------------------------------------------------------------------------|--------------------------------------------------------------------|
| Laura Clifton        | Core Surgical Trainee | MRCS          | <ul style="list-style-type: none"> <li>• Data curation</li> <li>• Formal analysis</li> <li>• Project administration</li> <li>• Supervise</li> </ul> | <a href="mailto:laura.clifton8@nhs.net">laura.clifton8@nhs.net</a> |
| Suhib Taher          | Core Surgical Trainee | MRCS          | <ul style="list-style-type: none"> <li>• Data curation</li> <li>• Formal analysis</li> <li>• Resources</li> </ul>                                   | <a href="mailto:Suhib.taher@nhs.net">Suhib.taher@nhs.net</a>       |
| Nicholas Jia Jie Wei | Core Surgical Trainee | MRCS          | <ul style="list-style-type: none"> <li>• Data curation</li> <li>• Formal analysis</li> <li>• Resources</li> </ul>                                   | <a href="mailto:nicholas.wei1@nhs.net">nicholas.wei1@nhs.net</a>   |
| Emma Reay            | T&O Consultant        | FRCS          | <ul style="list-style-type: none"> <li>• Data curation</li> <li>• Formal analysis</li> <li>• Resources</li> </ul>                                   | <a href="mailto:emma.reay1@nhs.net">emma.reay1@nhs.net</a>         |

33

34 **7. Department of Trauma and Orthopaedics, Aneurin Bevan University Health Board,**  
 35 **Royal Gwent Hospital, Newport, NP20 2UB, Wales**

| Name                  | Role                   | Qualification | Contribution                                                                                                                                        | E-mail                                                                                     |
|-----------------------|------------------------|---------------|-----------------------------------------------------------------------------------------------------------------------------------------------------|--------------------------------------------------------------------------------------------|
| Ashish Khurana        | T&O Consultant         | FRCS          | <ul style="list-style-type: none"> <li>• Data curation</li> <li>• Formal analysis</li> <li>• Project administration</li> <li>• Supervise</li> </ul> | <a href="mailto:ashish.khurana@wales.nhs.uk">ashish.khurana@wales.nhs.uk</a>               |
| Kathryn Rooney        | T&O Specialist Trainee | MRC S         | <ul style="list-style-type: none"> <li>• Data curation</li> <li>• Formal analysis</li> <li>• Resources</li> </ul>                                   | <a href="mailto:Kathryn.Rooney@wales.nhs.uk">Kathryn.Rooney@wales.nhs.uk</a>               |
| Nakanda Kakaire       | Core Surgical Trainee  | MRC S         | <ul style="list-style-type: none"> <li>• Data curation</li> <li>• Formal analysis</li> <li>• Resources</li> </ul>                                   | <a href="mailto:nakandamiriam.kakaire@wales.nhs.uk">nakandamiriam.kakaire@wales.nhs.uk</a> |
| Oluwawyemi si Adesina | Core Surgical Trainee  | MRC S         | <ul style="list-style-type: none"> <li>• Data curation</li> <li>• Formal analysis</li> <li>• Resources</li> </ul>                                   | <a href="mailto:quentinpz@yahoo.com">quentinpz@yahoo.com</a>                               |

36  
37  
38 **Informed consent: not applicable – addressed in Ethics section and observational study**

39  
40  
41 **Conflicting interest: Nil**

42  
43  
44 **Financial disclosure: Nil**

45  
46  
47 **Acknowledgements: Nil**

48  
49 **Word count: 4000 words**

1  
2  
3 51 **Keywords:** *COVID-19; orthopaedic trauma; UK multi-centre; pandemic wave; mortality*  
4  
5

6 52

7 53 **Contributor & guarantor information**

9 54 The corresponding author attests that all listed authors meet authorship criteria and that no  
10 55 others meeting the criteria have been omitted. All listed authors from all centres have  
11 56 contributed by mining and analysing data. KS, AA, CP and KMS conceptualised the study  
12 57 and agreed on the methodology. KS wrote the first draft and analysed the entire dataset. The  
13 58 dataset was then reviewed for accuracy by all authors within Imperial College Healthcare  
14 59 NHS Trust as well as contributing to subsequent drafts of the manuscripts. The final version  
15 60 was reviewed and signed off by each Consultant representative from each contributing centre.  
16 61 KS finalised the submission, and he is both the primary and corresponding author.  
17  
18  
19  
20  
21  
22  
23  
24  
25  
26  
27  
28  
29  
30  
31  
32  
33  
34  
35  
36  
37  
38  
39  
40  
41  
42  
43  
44  
45  
46  
47  
48  
49  
50  
51  
52  
53  
54  
55  
56  
57  
58  
59  
60

1  
2  
3 62 **Abstract**  
4 63

6 64 **Objective:** This is the first national study observing the impact of the COVID-19 pandemic  
7  
8  
9 65 on orthopaedic trauma with respect to referrals, operative caseload and mortality during its  
10  
11 66 peak.

13 67 **Design:** A longitudinal, national, multi-centre, retrospective, observational, cohort study was  
14  
15  
16 68 conducted for 6 weeks (namely the 'peak weeks') from March 17, 2020 compared to the  
17  
18 69 same period in 2019.

20 70 **Setting:** Hospitals from seven major urban cities were recruited around the UK, including  
21  
22  
23 71 London.

25 72 **Participants:** A total of 4840 clinical encounters were initially recorded. 4668 clinical  
26  
27 73 encounters were analysed post-exclusion.

29 74 **Primary and secondary outcome measures:** Primary outcomes included the number of  
30  
31  
32 75 acute trauma referrals and those undergoing operative intervention, mortality rates, and the  
33  
34 76 proportion of patients contracting COVID-19. Secondary outcomes consisted of the  
35  
36 77 mechanism of injury, type of operative intervention and proportion of aerosolising-generating  
37  
38  
39 78 anaesthesia utilised.

41 79 **Results:** During the COVID-19 period there was a 34% reduction in acute orthopaedic  
42  
43  
44 80 trauma referrals compared to 2019 (1792 down to 1183 referrals), and 29.5% less surgical  
45  
46 81 interventions (993 down to 700 operations). The mortality rate significantly (both statistically  
47  
48 82 and clinically) more than doubled for both risk and odds ratios during the COVID period in  
49  
50 83 all referrals (1.3% vs 3.8%,  $p=0.0005$ ) and in those undergoing operative intervention (2.2%  
51  
52 84 vs 4.9%,  $p=0.004$ ). Moreover, mortality due to COVID-related complications (versus non-  
53  
54  
55 85 COVID causes) had greater odds by a factor of at least 20 times. For the operative cohort  
56  
57 86 during COVID, there was a greater odds of aerosolising-generating anaesthesia (including  
58  
59  
60

1  
2  
3 87 those with superimposed regional blocks) by three-quarters as well as doubled odds of a  
4  
5 88 Consultant acting as the primary surgeon.  
6  
7  
8 89  
9

10 90 **Conclusion:** Although there was a reduction of acute trauma referrals and those undergoing  
11  
12 91 operative intervention, the mortality rate still more than doubled in odds during the peak of  
13  
14 92 the pandemic compared to the same time interval one year ago.  
15  
16

17 93  
18  
19 94 **Keywords:** COVID-19; orthopaedic trauma; UK multi-centre; pandemic wave; mortality  
20  
21 95  
22  
23

24 96 **Article summary: Strengths and limitations of this study**  
25  
26

- 27 97
- 28 • This was the first representative observational study of the UK looking into the  
29  
30 impact of COVID-19 pandemic on general Trauma and Orthopaedic surgical  
31 98  
32  
33 specialty.  
34 99  
35
  - 36 100 • There is a valid comparison between two timeframes, exactly one year apart to  
37  
38 represent pre-COVID and during COVID.  
39 101  
40  
41
  - 42 102 • Other studies thus far have only shed light on local scales or cross-speciality within a  
43  
44 shorter timeframe than this study and not necessarily commenting on mortality rates  
45 103  
46  
47 like this study.  
48 104  
49  
50
  - 51 105 • Weaknesses included loss of data points which have been accounted for in the tables  
52  
53  
54 (i.e. labelled as unknown) which did not affect the final analysis of data points.  
55 106  
56  
57  
58  
59  
60

1  
2  
3  
4  
5  
6  
7  
8  
9  
10  
11  
12  
13  
14  
15  
16  
17  
18  
19  
20  
21  
22  
23  
24  
25  
26  
27  
28  
29  
30  
31  
32  
33  
34  
35  
36  
37  
38  
39  
40  
41  
42  
43  
44  
45  
46  
47  
48  
49  
50  
51  
52  
53  
54  
55  
56  
57  
58  
59  
60

- 107 • Operations conducted outside the specific study periods will not account for all those  
108 operations required such as for hip fractures.

For peer review only

## 109 **Introduction**

### 110 111 *The Global Impact of COVID-19*

112 The COVID-19 pandemic will be remembered as one of the most unprecedented global  
113 health crises in modern history. With over 3 million deaths and over 141 million recorded  
114 cases globally, the pandemic has had a permanent impact on healthcare at the time of article  
115 submission.<sup>1</sup> The viral outbreak was first reported in December 2019 with the first patient  
116 hospitalized in the city of Wuhan, China.<sup>2</sup> By mid-March the outbreak affected over 190  
117 countries with over 450,000 cases and over 20,000 deaths, thus being declared a pandemic  
118 and a global public health emergency by the World Health Organization.<sup>3</sup> On January 24<sup>th</sup>  
119 2020 Europe reported its first case followed by a case in the United Kingdom (UK) 5 days  
120 later.<sup>4</sup>

### 122 *The British Response to the pandemic*

123 The English government responded by implementing social distancing measures on the 17<sup>th</sup>  
124 March 2020 in an attempt to reduce the rate of transmission and therefore the demands on the  
125 National Health Service (NHS).<sup>5</sup> This was followed a week later by more stringent measures,  
126 commonly referred to as a societal 'lockdown'.<sup>6</sup> As of the 23<sup>rd</sup> March 2020, all members of  
127 the public were required to stay at home. The NHS has also been deeply affected by the strain  
128 imposed by the virus as the healthcare infrastructure has had to evolve to cope with the  
129 overwhelming and unexpected pressures on staff, resources and finances. There has been a  
130 complete renovation of Emergency Medicine and Orthopaedic services to manage  
131 musculoskeletal disease and trauma. In response to the NHS emergency declaration,<sup>7</sup> the  
132 Royal Colleges of Surgeons<sup>8</sup> and the British Orthopaedic Association<sup>9</sup> both issued statements  
133 and guidelines for delivering emergency Trauma and Orthopaedic care during the COVID-19  
134 outbreak. The lockdown to limit the spread of the virus has had an unforeseen effect in



1  
2  
3 135 significantly reducing the acute trauma workload described in several single centre studies.<sup>10-</sup>  
4

5 136 <sup>13</sup> There has however not been a national reflection of the impact of the COVID-19 pandemic  
6

7 137 on the orthopaedic workload and its potential impact on the mortality.  
8

9  
10 138  
11

12  
13 139 **Aim**  
14

15 140 To observe the impact of COVID-19 on Trauma and Orthopaedic acute referrals, operative  
16

17 141 casemix and mortality rates during the 'peak weeks' of the pandemic compared to the same  
18

19 142 time interval in 2019.  
20  
21  
22

23 143  
24

25  
26 144 **Outcomes/objectives**  
27

28 145 Primary outcomes included the number of acute trauma referrals and those undergoing  
29

30 146 operative intervention, post-operative complications, mortality rates, and the proportion of  
31

32 147 patients contracting COVID-19. Secondary outcomes consisted of the mechanism of injury,  
33

34 148 type of operative intervention and proportion of aerosolising-generating anaesthesia utilised.  
35  
36  
37

38 149  
39  
40

41 150 **Alternative hypothesis**  
42

43  
44 151 The alternative hypothesis was that when comparing both years, there would be a difference  
45

46 152 in the prevalence of acute orthopaedic referrals, orthopaedic trauma casemix and aerosol-  
47

48 153 generating anaesthetic procedures due to social distancing/lockdown. Mortality rates and  
49

50 154 survival probabilities were also hypothesised to differ due to the first COVID-19 outbreak.  
51  
52  
53

54 155  
55  
56  
57  
58  
59  
60

1  
2  
3 **156 Methods**  
4  
5

6 *157 Study design:* This is the first national, multi-centre longitudinal observational study  
7  
8 *158* observing patients who were acutely referred to the Trauma and Orthopaedic departments as  
9  
10 *159* well as those operated on within the same six-week interval comparing 2019 to 2020.  
11  
12

13  
14 **160**  
15

16 *161 Patient sampling:* All acute referrals, operative notes, inpatient medical records and discharge  
17  
18 *162* summaries were accessed using electronic medical system at each contributing hospital trust.  
19  
20

21  
22 **163**  
23

24 *164 Study period:* The six-week study period was from the start of social distancing on Tuesday  
25  
26 *165* 17<sup>th</sup> March 2020 to Tuesday 31<sup>st</sup> April 2020 which encompassed the national ‘lockdown’  
27  
28 *166* measures instigated on the 23<sup>rd</sup> March 2020. This period was considered the ‘golden peak’ of  
29  
30 *167* the epidemic in the UK. This was compared to the same six-week interval from Tuesday 19<sup>th</sup>  
31  
32 *168* March to Tuesday 30<sup>th</sup> April 2019 (i.e. prior to any COVID-19 related measures) to compare  
33  
34 *169* the impact of the pandemic one year apart.  
35  
36  
37

38  
39 **170**  
40

41 *171 Inclusion criteria:* All acute orthopaedic trauma referrals presenting to the Emergency  
42  
43 *172* Department during the intervals one year apart were included. All orthopaedic trauma cases  
44  
45 *173* that required an operation, including those from acute orthopaedic trauma referrals, within  
46  
47 *174* the intervals one year apart. Those patients listed for an operation prior to time period of data  
48  
49 *175* collection were included in the final analysis. We adhered to STROBE guidelines for  
50  
51 *176* observational studies.  
52  
53  
54

55  
56 **177**  
57  
58  
59  
60

178 *Exclusion criteria:* Any cases being referred internally from other specialties for Trauma and  
 179 Orthopaedic advice and input, as well as referrals from any external centre asking for tertiary  
 180 advice were excluded from further analysis. Any patients with post-operative complications  
 181 arising from the period prior to the data collection were excluded. For operative trauma cases,  
 182 those undergoing spinal procedures were excluded as these are jointly treated by  
 183 Neurosurgery in most hospitals. All non-urgent semi-elective procedures were excluded from  
 184 analysis as well, as they would inaccurately assess the impact of any social distancing  
 185 measures on the trauma workload. Routine elective orthopaedic cases were excluded.

186 *Data points:* Demographics including age, sex and ASA grades were recorded for all  
 187 patients. Injury characteristics were recorded, including the anatomical location and if the  
 188 injury was open or closed. The mechanism of injury was categorised and whether the patient  
 189 was referred as a trauma call. The nature of the operative procedures and the anaesthetic  
 190 techniques were recorded. Patients undergoing multiple procedures were recorded for every  
 191 episode where they were taken to theatre. Six-week mortality rate was recorded as well as the  
 192 COVID-19 status of any symptomatic patients or suspected cases. Data points were divided  
 193 into acute referrals and operative casemix as seen in table 1.

194  
 195 *Table 1: data points for acute referrals and operative casemix*

|                     |                                        |                                                |                               |
|---------------------|----------------------------------------|------------------------------------------------|-------------------------------|
| Age (years)         | Gender (Male / female by birth)        | ASA (1-5)                                      | Date of injury / presentation |
| Injury              | Mechanism of injury                    | Open Vs Closed fracture                        | Trauma Call (Yes / No)        |
| Operative procedure | Anaesthetic Technique (AGP vs non-AGP) | Seniority of Surgeon (Consultants vs trainees) | Comorbidities                 |
| Six-week mortality  | Post-op complications                  | Surgery time since admission (hours)           | COVID status (from PCR swabs) |

196

197 • *Anaesthetic techniques:* This was divided into anaesthetic aerosolising-generating  
198 procedures (AGP) which consisted of any intubation (including laryngeal mask  
199 airway and endotracheal intubation) for a general anaesthetic. All other anaesthetic  
200 techniques including regional and local anaesthetics were deemed as non-AGPs.

201 • *COVID status:* groups of patients were divided into either not swabbed, swabbed due  
202 to presence of documented symptoms, negative swabs and positive results.

203 *Statistical analysis:* All the data were recorded, anonymised and verified by four members of  
204 the study group for their accuracy. The data were processed using Microsoft Excel  
205 (Microsoft, Washington, USA). Shapiro-Wilk test indicated a normal distribution for patient  
206 demographics. Hence, the mean ( $\pm$  standard deviation; 95% CI) were calculated for both age,  
207 ASA grade and days to discharge from hospital. Both prevalence or risk and odds ratios were  
208 calculated as well as a Fisher's exact test for statistical significance for categorical data,  
209 defined as  $p \leq 0.05$ . Percentages and confidence intervals were rounded off to one decimal  
210 place.

211 *Ethics and permissions:* All data points were utilised for routine auditing purposes to reflect  
212 departmental activity and service provision without altering clinical care pathways. Each  
213 centre contributing data to this study registered their interests with local authority and the  
214 auditing or clinical governance departments. No informed consent was required as there was  
215 no identifiable data. All data were anonymised at the time of collection and submission. Each  
216 patient was assigned a unique identification number which was cross-referenced with the  
217 patients' individual hospital identification or medical record numbers. This cross-referenced  
218 list remained internally within the hospital trust computer server handled by the contributing  
219 team from each trust. The data was transferred and stored using the NHS.net email server  
220 which has been approved for transfer of patient data. Data protection compliance was abided

1  
2  
3 221 by at all times. The lead centre was Imperial College Healthcare NHS Trust where this study  
4  
5 222 was first approved as a clinical audit prior to expanding onto a national scale.  
6  
7

8 223 All centres gave permission for the use of their data. This study was assessed using the  
9  
10 224 UKRI/MRC/NHS Health Research Authority Ethics Decision Tool and was considered an  
11  
12 225 'audit/not research'; and therefore it was not subject to further ethical review by the NHS  
13  
14 226 Research Ethics Committee (NHS REC).  
15  
16  
17

18 227  
19 228 *Competing interests:* The authors have declared that no competing interests exist.  
20 229  
21

22 230 *Data sharing statement:* Underlying data, code and supporting documentation may be made  
23  
24 231 available as a redacted version to interested parties, subject to the completion of a protocol  
25  
26 232 and signing of a Data Transfer Agreement.  
27  
28

29 233  
30  
31 234 *Funding statement:* This research received no specific grant from any funding agency in the  
32  
33 235 public, commercial or not-for-profit sectors.  
34  
35

36 236  
37  
38 237 *The collaborative:* The COVID Emergency Related Trauma and orthopaedics (COVERT)  
39  
40 238 Collaborative was founded at Imperial College Healthcare NHS Trust. It is currently a  
41  
42 239 member of the COVID Research Group and it has been endorsed by the Royal College of  
43  
44 240 Surgeons of England and Imperial College Healthcare NHS Trust.  
45  
46

47  
48 241  
49  
50  
51 242 *Patient and Public Involvement:* This was a retrospective study observing clinical outcomes.  
52  
53 243 Patients were not involved in the study design, recruitment or conduct. The anonymous data  
54  
55 244 will be disseminated through publication.  
56  
57  
58  
59  
60

## 245 Results

246 A total of 4840 clinical encounters took place between the study periods. A total of 172  
 247 spinal operations and presentations were excluded from the final analysis. Table 2 outlined  
 248 demographic data. Figures 1 and 2 have categorized these clinical encounters into acute  
 249 referrals and operative cases between both years respectively.

250

251 *Table 2: Demographic data of pre- and post-COVID*

|                        |                                         | Pre-COVID (2019)             |       | COVID (2020)                 |       |
|------------------------|-----------------------------------------|------------------------------|-------|------------------------------|-------|
|                        | <b>Total</b>                            | <b>1792</b>                  |       | <b>1183</b>                  |       |
| <b>Acute referrals</b> | <i>Male</i>                             | 935                          | 52.2% | 560                          | 47.3% |
|                        | <i>Female</i>                           | 857                          | 47.8% | 623                          | 52.7% |
|                        | <i>Mean age ± SD</i><br><i>(95% CI)</i> | 52.2 ± 27.9<br>(50.9 - 53.5) |       | 55.8 ± 27.9<br>(54.3 - 57.4) |       |
|                        | <b>Total</b>                            | <b>993</b>                   |       | <b>700</b>                   |       |
| <b>Operative cases</b> | <i>Male</i>                             | 499                          | 50.3% | 320                          | 45.7% |
|                        | <i>Female</i>                           | 494                          | 49.7% | 380                          | 54.3% |
|                        | <i>Mean Age ± SD</i><br><i>(95% CI)</i> | 51.7 ± 28.1<br>(50 - 53.5)   |       | 57.7 ± 26.7<br>(55.7 - 59.6) |       |
|                        | <i>Mean ASA ± SD</i><br><i>(95% CI)</i> | 2 ± 1<br>(2 - 2)             |       | 2 ± 1<br>(2 - 2)             |       |
|                        |                                         |                              |       |                              |       |

252

253 *Figure 1a: Types and mechanisms of injuries for acute referrals*

254 *Figure 1b: Types and mechanisms of injuries for operative cases*

255 *Figure 2: operative and anaesthetic techniques compared between pre- and post-COVID*

256

257

258

259

260

1  
2  
3 258 **COVID status**  
4

5 259 At the time, COVID was being diagnosed with polymerase chain reaction (PCR) from nasal  
6  
7 260 and oropharyngeal swabs with a duration of 1 to 4 days where the sample was tested both  
8  
9  
10 261 locally in the hospital lab as well as corroborated with national lab testing to reduce risk of  
11  
12 262 unequivocacy. COVID status for overall patient groups in acute referrals and operative  
13  
14 263 casemix were demonstrated in figure 3, whereas the COVID status of all mortalities were  
15  
16  
17 264 outlined in figure 4.  
18

19 265

20  
21 266 *Figure 3: COVID status for acute referrals and operative cases as a measure of proportions*  
22

23  
24  
25 267 *Figure 4: COVID status of all mortalities (with 5% error bars)*  
26

27  
28 268  
29

30  
31 269  
32  
33  
34  
35  
36  
37  
38  
39  
40  
41  
42  
43  
44  
45  
46  
47  
48  
49  
50  
51  
52  
53  
54  
55  
56  
57  
58  
59  
60

270 *Risk (or prevalence) and odds ratios*271 *Table 3: Risk (or prevalence) and odds ratios for acute referrals and operative caseloads*

|                                  |                                                                  | Acute referrals          |      |         | Operative caseload |      |         |
|----------------------------------|------------------------------------------------------------------|--------------------------|------|---------|--------------------|------|---------|
|                                  |                                                                  | RR                       | OR   | p-value | RR                 | OR   | p-value |
| <b>Morbidity &amp; Mortality</b> | Mortality                                                        | 2.50                     | 2.55 | 0.0005  | 2.19               | 2.25 | 0.004   |
|                                  | Mortality due to COVID-related complications vs non-COVID causes | 14.2                     | 19.7 | 0.004   | 15.1               | 22.0 | 0.004   |
|                                  | Peri-/post-operative complications including COVID               |                          |      |         | 5.88               | 6.09 | 0.00001 |
|                                  | Peri-/post-operative complications excluding COVID               |                          |      |         | 3.65               | 3.72 | 0.003   |
|                                  | Peri-/post-operative COVID positive testing                      |                          |      |         | 32.6               | 23.4 | 0.0009  |
|                                  | <b>Anaesthetic technique</b>                                     | General anaesthetic only |      |         |                    | 1.22 | 1.61    |
| General anaesthetic ± block      |                                                                  |                          |      |         | 1.23               | 1.75 | 0.00001 |
| <b>Consultant involvement</b>    | Consultant-led operation                                         |                          |      |         | 1.36               | 2.08 | 0.00001 |
| <b>Operation technique</b>       | Open reduction + internal fixation                               |                          |      |         | 0.81               | 0.74 | 0.007   |
|                                  | Dynamic hip screw                                                |                          |      |         | 2.02               | 2.11 | 0.00001 |
|                                  | Removal of metal/foreign body                                    |                          |      |         | 0.24               | 0.23 | 0.003   |
|                                  | Road traffic accident                                            | 0.58                     | 0.56 | 0.001   | 0.45               | 0.43 | 0.00001 |



|                            |                              |      |      |         |      |      |         |
|----------------------------|------------------------------|------|------|---------|------|------|---------|
| <b>Mechanism of injury</b> | Fall (<1.5m)                 | 1.19 | 1.54 | 0.00001 | 1.17 | 1.49 | 0.0001  |
|                            | Sporting injury              | 0.63 | 0.60 | 0.0005  | 0.64 | 0.61 | 0.003   |
|                            | Infection                    | 0.69 | 0.66 | 0.001   | 1.70 | 1.77 | 0.005   |
|                            | Trauma call                  |      |      |         | 0.55 | 0.52 | 0.0005  |
| <b>Type of injury</b>      | Neck of femur (NOF) fracture | 1.44 | 1.57 | 0.00001 | 1.51 | 1.79 | 0.00001 |
|                            | Lower limb (excl. NOF)       | 0.89 | 0.84 | 0.04    | 0.74 | 0.65 | 0.0001  |
| <b>Gender</b>              | Male                         | 0.91 | 0.82 | 0.01    |      |      |         |

272

273 Table 3 outlined the risk (or prevalence) and prevalence odds ratios alongside their 95%  
 274 confidence intervals and statistical significance. The risk ratio is synonymous with the  
 275 prevalence ratio. Only those factors that were statistically significant within the acute  
 276 referrals and operative caseloads were included.

277 Although the expectation was to minimize the use of aerosolising-generating anaesthetic  
 278 procedures, there was in fact an increased prevalence of using general anaesthesia ± block up  
 279 to an odds of 75%, perhaps to create a ‘closed circuit’ for the airways. As the anaesthetic  
 280 methods was not well documented in the pre-COVID era in a fifth (21.3%) of cases, this  
 281 could have skewed the data as it may have been difficult to extract that data from last year.  
 282 The odds of a Consultant-led operation doubled (OR=2.08) during the COVID period as a  
 283 consequence of all elective operations being suspended and more Consultants being relocated  
 284 to trauma theatre and increased pressure within the theatre environments leading to  
 285 Consultant-delivered, rather than Consultant-led care. With respect to surgical procedures,  
 286 there was a significant reduction in prevalence ratio of open reduction and internal fixation  
 287 by a fifth (PR=0.81) and removal of metalwork and foreign bodies by three-quarters

1  
2  
3 288 (PR=0.24), while there was a doubling (PR=2.02) in dynamic hip screw fixation in the  
4  
5 289 COVID era.

6  
7  
8 290 With respect to the acute referrals, patients had half (OR=0.52) the odds of presenting as a  
9  
10 291 trauma call. This could be due to the odds ratios of road traffic accidents, sporting injuries,  
11  
12 292 infection, and lower limb injuries were significantly less (by 34-44%; OR=0.56-0.66) during  
13  
14 293 the COVID period. Yet, the odds of presenting with a neck of femur fracture and having falls  
15  
16 294 less than 1.5m height increased by 54% (OR=1.54).

17  
18  
19  
20 295

### 21 22 23 296 **Morbidity and Mortality**

24  
25 297 Table 3 indicated that the mortality rate more than doubled significantly for both prevalence  
26  
27 298 (or risk; RR=2.19-2.50) and odds (OR=2.25-2.55) ratios during the COVID period. This  
28  
29 299 certainly has both statistical as well as clinical significance. COVID-related complications  
30  
31 300 were still responsible for increasing the odds of mortality by 20 to 22 times within all  
32  
33 301 mortalities from both acute referrals and operative cases (as compared to non-COVID causes  
34  
35 302 for all mortality in the year 2019). Table 4 confirmed that the mean age of mortalities across  
36  
37 303 the board were in the elderly patient population with a high mean ASA grade. Males were  
38  
39 304 consistently in the minority, while neck of femur fracture was the modal diagnosis due to  
40  
41 305 falls and persistently in the majority, followed by lower limb injuries (figures 5a and b). At  
42  
43 306 least 82% of operations were related to neck of femur fractures in which half of all operations  
44  
45 307 during the COVID period involved anaesthetic AGPs. Whereas the mortalities from pre-  
46  
47 308 COVID operations did not have Consultant-led (as primary surgeon) surgery, that increased  
48  
49 309 to three-fifths of all operations conducted during the COVID period (figure 5c). The mean  
50  
51 310 date of presentation to hospital was one week ahead in year 2020 compared to a year ago but  
52  
53 311 the time from admission to mortality differed only by a mean of less than a day in both  
54  
55  
56  
57  
58  
59  
60

1  
2  
3 312 categories. Although, COVID positive swabs were confirmed in 29% of acute referrals and in  
4  
5 313 a 32% of operative cases (figure 3), mortalities in each cohort were 6% and 8.1%  
6  
7  
8 314 respectively. However, only 0.9% and 1.6% were confirmed with COVID positive PCR  
9  
10 315 swabs within one week of the date of mortality (figure 4).  
11  
12

13 316

14  
15 317

16  
17  
18  
19  
20  
21  
22  
23  
24  
25  
26  
27  
28  
29  
30  
31  
32  
33  
34  
35  
36  
37  
38  
39  
40  
41  
42  
43  
44  
45  
46  
47  
48  
49  
50  
51  
52  
53  
54  
55  
56  
57  
58  
59  
60

For peer review only

318 Table 4: Patient demographics, date of injuries, and time to mortality

|                                                        | <i>Acute referrals</i>       |     |                           |     | <i>Operative casemix</i>    |     |                              |     |
|--------------------------------------------------------|------------------------------|-----|---------------------------|-----|-----------------------------|-----|------------------------------|-----|
|                                                        | 2019                         |     | 2020                      |     | 2019                        |     | 2020                         |     |
|                                                        | (n=23)                       |     | (n=38)                    |     | (n=22)                      |     | (n=34)                       |     |
| Mortality                                              | 1.3%                         |     | 3.2%                      |     | 2.2%                        |     | 4.9%                         |     |
| Mortality with COVID positive PCR result               |                              |     | 0.9%                      |     |                             |     | 1.6%                         |     |
| Post-op morbidity                                      |                              |     |                           |     | 0.7%                        |     | 4.1%                         |     |
| Age (years; mean±SD; 95% CI)                           | 80.2 ± 16.4<br>(73.2 - 87.2) |     | 77 ± 23<br>(67 - 88)      |     | 83.9±12.2<br>(78.7 - 89.1)  |     | 84.0±13.5<br>(79.4 - 88.5)   |     |
| Male                                                   | 9                            | 39% | 16                        | 42% | 8                           | 36% | 15                           | 44% |
| ASA (mean±SD; 95% CI)                                  |                              |     |                           |     | 3 ± 0<br>(3 to 3)           |     | 3 ± 1<br>(3 to 3)            |     |
| Date of injury (mean days±SD; 95%CI)                   | 6/4 ± 11<br>(1/4 - 10/4)     |     | 31/3 ± 12<br>(26/3 - 5/4) |     | 6/4 ± 12<br>(1/4 - 11/4)    |     | 30/3 ± 14.2<br>(25/3 - 4/4)  |     |
| Time from admission to mortality (mean days±SD; 95%CI) | 10.3 ± 7.5<br>(7.1 - 13.5)   |     | 11 ± 10<br>(7 - 15)       |     | 14.3 ± 10.4<br>(9.8 - 18.7) |     | 13.8 ± 10.4<br>(10.2 - 17.3) |     |

319

320 *Figure 5a: types and mechanism of injury for mortalities in acute referral cohorts*321 *Figure 5b: types and mechanism of injury for mortalities in operative casemix cohorts*322 *Figure 5c: Surgical and anaesthetic techniques utilized in mortalities as a means of*

323

*proportions*

324

1  
2  
3 325 Taking into account that COVID was a peri-operative complication since patients may have  
4  
5 326 been symptomatic with COVID manifestations pre-operatively but only had the swab results  
6  
7 327 return with a positive finding either pre- or post-operatively; the commonest post-operative  
8  
9 328 complication in the COVID period was a hospital-acquired pneumonia but with negative  
10  
11 329 COVID swab results or the decision not to test at all. The second most common post-  
12  
13 330 operative complication in the year 2020 was extra-pulmonary sepsis (figure 6). The  
14  
15 331 proportion of post-operative complications had significantly increased when including or  
16  
17 332 excluding COVID as a peri- or post-operative complication in 2020 (0.70% vs. 2.57-4.14%;  
18  
19 333  $p=0.003$ ) with varying odds (3.72-23.4) and risk (3.65-32.6) ratios (table 3).  
20  
21  
22  
23  
24  
25

26  
27 335 *Figure 6: Post-operative complications for both years*  
28

29 336  
30  
31 337 Figures 7a and b focused on the total number and nature of comorbidities within the mortality  
32  
33 338 groups. Multiple contingency chi-square test was insignificant for both number of  
34  
35 339 comorbidities and individual comorbidities between both years, except for cardiovascular and  
36  
37 340 cerebrovascular disease in acute referrals. This was corroborated by the COVIDSurg  
38  
39 341 publication<sup>14</sup> which confirmed a significant association of mortality with myocardial  
40  
41 342 infarction and congestive heart failure. However, hypertension and stroke/transient ischemic  
42  
43 343 attacks were not significantly associated. In our study, all cardiovascular diseases (including  
44  
45 344 peripheral vascular, arrhythmias, hypertension, heart failure, myocardial infarction and acute  
46  
47 345 coronary syndromes) were combined with cerebrovascular diseases (consisting of strokes and  
48  
49 346 transient ischemic attacks). Unlike their study, our study did not find a significant association  
50  
51 347 with chronic kidney disease, chronic obstructive disease (which included asthma) and  
52  
53 348 dementia in all mortalities during the 2020 timeframe regardless of the COVID status. The  
54  
55 349 differences may stem from that their study looked at the comparison of mortality rates within  
56  
57  
58  
59  
60

1  
2  
3 350 the same cohort during the COVID era, whereas this study is sub-analysing the entire  
4  
5 351 mortality cohort on its own to observe for specific associations and risks.  
6  
7  
8 352

9  
10 353 *Figure 7a: Type of comorbidities for all mortalities in both years*

11  
12  
13 354 *Figure 7b: number of comorbidities for all mortalities in both years*

14  
15 355

### 16 356 **Survival probability**

17  
18 357 A six-week Kaplan-Meier survival probability analysis for mortalities between both years  
19  
20 358 was plotted in figure 8a.  
21  
22  
23  
24

25 359

26  
27  
28 360 *Figure 8a: Six-week Kaplan-Meier survival probability analysis for mortalities between pre-*  
29  
30 361 *and post-COVID for acutely referred from the Emergency Department*

31  
32 362

33  
34  
35 363 There were similar patterns of survival probability between both cohorts (i.e. 2019 vs 2020  
36  
37 364 cumulative). However, the lowest survival probability and the shortest timeframe were  
38  
39 365 observed in the confirmed COVID positive cohort as seen in figure 8a. This may be due to  
40  
41 366 the most vulnerable patient profile. 8 (72.7%) patients had femoral trauma, most being neck  
42  
43 367 of femur fractures, distal femur fracture and a dislocated hip hemiarthroplasty post-fracture.  
44  
45 368 Other patients presented with septic arthritis, post-operative complication and knee swelling;  
46  
47 369 yet every patient also suffered from multiple comorbidities including those leading to  
48  
49 370 immunosuppression as seen in figures 7a and b. Although these patients were prioritised in  
50  
51 371 the Emergency Department and recognised for their poor physiological reserve, due to the  
52  
53 372 stresses of the acute and emergency services, these patients may have had to wait longer to be  
54  
55 373 treated acutely and appropriately admitted.  
56  
57  
58  
59  
60

1  
2  
3 3744  
5  
6 375 *Figure 8b: Six-week Kaplan-Meier survival probability analysis for mortalities between pre-*  
7  
8 376 *and post-COVID for those undergoing surgery*9  
10  
11 37712  
13 378 Unexpectedly, there was a reversal of trends observed for the six-week Kaplan-Meier  
14  
15 379 survival analysis once admitted and operated on in figure 8b. Mortalities within the pre-  
16  
17 380 COVID period had the lowest survival probability compared to the post-COVID cohort. The  
18  
19 381 COVID positive mortalities were observed to have the highest survival probability 11 days  
20  
21 382 prior to converging with those mortalities without COVID symptoms. This was most likely to  
22  
23 383 be due to multifactorial factors.  
24  
25 38426  
27 38528  
29 386 During the pandemic, wards were ring-fenced to host confirmed COVID positive patients  
30  
31 387 with a heightened care of nursing, medical cover and personal protective equipment. Prior to  
32  
33 388 the onset of a possible vaccination to counteract the virus, symptomatic management and  
34  
35 389 shielding were the mainstay treatments for COVID positive patients. None of these patients  
36  
37 390 were stepped up to the Intensive Treatment Unit due to being categorised as high-risk  
38  
39 391 stratification for mortality based on age and extent of comorbidities.  
40  
41 39242  
43 39344  
45 394 If these 'at risk' patients were symptomatic with the virus, then aggressive pre-operative  
46  
47 395 optimisation would occur. Since 91% (n=10) of COVID positive patients had sustained a  
48  
49 396 neck of femur fracture, the National Hip Fracture Database best practice tariff of operating  
50  
51 397 within an ideal 36-hour window set by the Royal College of Physicians was suspended until  
52  
53 398 the patient was stabilised. All hip fracture patients in this cohort were operated on and had  
54  
55 399 dedicated orthogeriatric input commencing from hospital admission. Hence the early peri-  
56  
57 400 operative period and surgery encompassed within the 10-day period post-admission.  
58  
59  
60

1  
2  
3 399 Moreover, neck of femur fractures are recognised as a pre-terminal illness and are known to  
4  
5 400 carry a high risk of mortality in the first month which is trebled in the first year after the  
6  
7 401 injury.<sup>15</sup>  
8  
9  
10  
11  
12  
13  
14  
15  
16  
17  
18  
19  
20  
21  
22  
23  
24  
25  
26  
27  
28  
29  
30  
31  
32  
33  
34  
35  
36  
37  
38  
39  
40  
41  
42  
43  
44  
45  
46  
47  
48  
49  
50  
51  
52  
53  
54  
55  
56  
57  
58  
59  
60

For peer review only



## 402 Discussion

### 403 Statement of principal findings

404 There was a significant difference between pre- and post-COVID periods at its 'peak weeks'.

405 The alternative hypothesis was not rejected with respect to prevalence of (i) acute  
406 orthopaedic trauma referrals (reduced by 34%), (ii) surgical interventions (reduced by  
407 29.5%), (iii) anaesthetic aerosolising-generating procedures, (iv) mortality rates (more than  
408 doubled in the COVID period), and (v) survival probability between pre- and post-COVID  
409 eras. The 34% reduction in acute trauma referrals is in keeping with previous single centre  
410 studies performed in the UK with results ranging between 26-59%.<sup>10-13,16,17</sup> As described in  
411 these previous studies we would attribute the overall reduction of trauma workload to be due  
412 to reduction in travel and outdoor activities during the national lockdown.

413

414 MacDonald *et al.*<sup>18</sup> described a similar effect in their multi-centre study with a reduction of  
415 operative workload by 26.5% compared to 29.5% in our study. Sites recruited for this study  
416 confirmed that they continued to operate at their own facilities during the data collection  
417 period whereas some later used alternative and external facilities including private hospitals  
418 through NHS England pathways (as mentioned by Dayananda *et al.*<sup>19</sup>), which may have  
419 impacted nosocomial rates of COVID, morbidity and mortality. However, this would be  
420 difficult to assess since it would also depend on the diversions of the ambulance services to  
421 'clean' and 'contaminated' hospital sites.

422

423 There was a significant decline in the odds of trauma calls, road traffic accidents, sporting  
424 injuries and lower limb fractures. Conversely, there was a significant rise in the odds of neck  
425 of femur fractures, falls, the use of anaesthetic AGP and Consultant-led operations; a finding

1  
2  
3 426 also reflected by Arafa *et al.*<sup>20</sup>. Since the aetiology of neck of femur fracture are often low  
4  
5 427 energy falls in the home environment, it is not unexpected to observe a consistency of neck of  
6  
7 428 femur fractures in the elderly and the vulnerable during lockdown. Odds of falls may have  
8  
9 429 increased due to prodromal symptoms and clinical manifestations of COVID.  
10  
11  
12

13 430

### 15 431 **Morbidity and Mortality rates**

17 432 Mortality rates significantly doubled for both prevalence (or risk) and odds ratios during the  
18  
19 433 COVID-19 period and a third (29-32%) of those deaths had a positive COVID-19 diagnosis.  
20  
21 434 Comparatively, the COVIDSurg Collaborative observed a 30-day mortality rate of 28.8%  
22  
23 435 ( $p < 0.0001$ ) of Orthopaedic patients who underwent surgery (both elective and trauma) within  
24  
25 436 the first quarter of the year.<sup>14</sup> Those with neck of femur fractures remain at greatest risk of  
26  
27 437 mortality and there have been further studies evaluating the risk of COVID-19 on this  
28  
29 438 inherently high risk cohort.<sup>21-24</sup> The increased mortality reflect the increased proportion of  
30  
31 439 NOFF patients that have a higher baseline mortality which has been echoed by the Scottish  
32  
33 440 IMPACT-Restart study.<sup>24</sup>  
34  
35  
36  
37  
38  
39

40 441

41 442 A subgroup analysis separating NOFF to non-NOFF mortality is demonstrated in table 4.  
42  
43 443 There was no statistical difference in the odds and risk ratios between both years for mortality  
44  
45 444 rate in NOFF. The numbers have not changed much, but because of a drop off of other cases,  
46  
47 445 the percentage of NOFF markedly rose. Hence, the mortality expressed as a percentage of  
48  
49 446 cases is notably higher for all operations, and not necessarily if stripped down to hip fractures  
50  
51 447 alone.  
52  
53

54 448

56 449 As lockdown measures in the UK and globally eases and the incidence of trauma returns to  
57  
58 450 pre-lockdown trends, it is imperative that we understand the true increased risk of mortality  
59  
60

1  
2  
3 451 in the acute trauma patient during the COVID-19 era. A recent publication by Kader et al.<sup>25</sup>  
4  
5 452 has suggested that the rate of mortality from COVID-19 for elective Orthopaedic patients is  
6  
7 453 low; yet this is the first nationwide study to quantify mortality risk for trauma patients.

8  
9  
10 454 Trauma procedures due to the nature of the injuries are necessary and time-critical, and  
11  
12 455 nobody can afford to postpone trauma care even during a global pandemic.<sup>26</sup>  
13  
14  
15 456

16  
17 457 Furthermore, the Corona Hands Collaborative<sup>27</sup> published that upper limb trauma patients  
18  
19 458 had SARS-CoV-2 complication rate of 0.18% (n=2) with 0.09% (n=1) overall mortality at  
20  
21 459 the peak of the first wave in April 2020. However, their collaborative looked into a shorter  
22  
23 460 post-operative period (30 vs 42 days) but they agreed that patients who had been hospitalised  
24  
25 461 for a prolonged period before their surgery were at increased risk of both COVID-related and  
26  
27 462 post-operative complications. Most of their patient cohort, who were both younger and fitter  
28  
29 463 than our cohorts, would be classified as the 'walking wounded' and could usually be day-case  
30  
31 464 procedures.  
32  
33  
34  
35 465

36  
37 466 Although the trends in mechanisms of injury in our study were reflective of those within a  
38  
39 467 US multi-centre study, there was an opposing trend in the number medical/surgical  
40  
41 468 procedures.<sup>28</sup> That could be due to their study encompassing on level 1 trauma centres with a  
42  
43 469 mean younger patient population. However, we do agree that with time and from experiential  
44  
45 470 learning, hospitals improved their coping strategies with the pandemic and enhanced patient  
46  
47 471 safety by enforcing personal protection equipment, hosting dedicated theatres for COVID-  
48  
49 472 positive patients, separating sites as clean and contaminated, ringfencing COVID-positive  
50  
51 473 patients to dedicated wards, and promoting routine COVID PCR swabs for all admissions  
52  
53 474 and pre-operative checklists.  
54  
55  
56  
57  
58 475

1  
2  
3 476 With an overall mortality risk in 2020 doubled that of 2019, clinicians need to counsel  
4  
5 477 patients presenting with acute orthopaedic trauma of the increased risk in the COVID-19 era,  
6  
7 478 especially for those identified as increased risk stratification with multiple underlying  
8  
9 479 comorbidities, elderly and frailty. With the ongoing risk of a second wave and resurgence of  
10  
11 480 COVID-19 cases on top of the inevitable winter pressures, this data is of critical importance  
12  
13 481 in the risk management, decision-making and policymaking of trauma patients both in the  
14  
15 482 UK and across the globe.  
16  
17  
18  
19  
20

483

#### 484 **Strengths and weaknesses of the study and in relation to other studies**

23 485 This was the first representative observational study of the UK looking into the impact of  
24  
25 486 COVID-19 pandemic on general Trauma and Orthopaedic surgical specialty. Studies thus far  
26  
27 487 have only shed light on local scales or cross-speciality.<sup>10-14</sup> Weaknesses included loss of data  
28  
29 488 points which have been accounted for in the tables (i.e. labelled as unknown). However this  
30  
31 489 did not affect the final analysis of data points. Operations conducted outside the specific  
32  
33 490 study periods will not account for all those operations required such as for NOFF. It does not  
34  
35 491 suggest that the number of NOFF not accounted for have been managed conservatively (as  
36  
37 492 discovered by Cherevu et al.<sup>29</sup>), since some NOFFs may breach time to surgery due to  
38  
39 493 medical reasons and allowing for international guidelines.<sup>30</sup>  
40  
41  
42  
43  
44

494

### 495 **Limitations and future research**

496 It is vital to continue exploring the impact of the pandemic on a larger scale. Ideally, more  
497 secondary care providers consisting of district general hospitals and major trauma centres  
498 will submit data. The diagnosis of COVID was dependent on positive PCR swabs for this  
499 study rather than non-specific changes seen on chest CT or plain radiographs. This does not  
500 account for false negatives with clinical respiratory symptomatology or true positives in those  
501 asymptomatic. Nevertheless, this issue with data has been speculated on in another national  
502 study.<sup>27</sup> Data ought to be submitted during the peak of the pandemic as well as at various  
503 time intervals as the lockdown measures ease resulting in more freedom of movement while  
504 also accounting for the continued risk of subsequent waves and national lockdowns.<sup>31</sup> Further  
505 studies will also require to compare the impact of the pandemic on the speciality in the UK  
506 compared to other countries on other continents.

1  
2  
3 507 **Conclusion**  
4

5 508 This was the first, longest and largest national representation of the impact of COVID-19  
6  
7 509 pandemic on acute Orthopaedic trauma referrals and mortality between mid-March to end-  
8  
9 510 April, representing the ‘peak weeks’ during the lockdown. The mortality rate for acute  
10  
11 511 referrals, as well as those undergoing operative intervention, more than doubled in odds when  
12  
13 512 compared to the same time interval one year ago. The majority of mortalities consisted of the  
14  
15 513 elderly with neck of femur fractures and cardiovascular and/or cerebrovascular diseases. This  
16  
17 514 study will aid clinicians in counselling trauma patients of the increased risk of mortality  
18  
19 515 during the era of COVID-19 and also aid in both healthcare infrastructure, resource  
20  
21 516 allocation, decision-making and policymaking as we continue to battle with the pandemic.  
22  
23  
24  
25  
26  
27  
28  
29  
30  
31  
32  
33  
34  
35  
36  
37  
38  
39  
40  
41  
42  
43  
44  
45  
46  
47  
48  
49  
50  
51  
52  
53  
54  
55  
56  
57  
58  
59  
60

1  
2  
3 517 **References**  
4

- 5  
6 518 1. World Health Organization (a). WHO Coronavirus Disease (COVID-19) Dashboard.  
7  
8  
9 519 Available online at <https://covid19.who.int>. Cited 2021 May 29  
10  
11  
12 520 2. Wu F, Zhao S, Yu B, Chen YM, Wang W, Song ZG, et al. A new coronavirus associated  
13  
14 521 with human respiratory disease in China. *Nature*. 2020;579:265-9.  
15  
16 522 3. World Health Organization. Coronavirus disease 2019 (COVID-19): situation report, 66.  
17  
18 523 26 March 2020. [https://www.who.int/docs/default-source/coronaviruse/situation-](https://www.who.int/docs/default-source/coronaviruse/situation-reports/20200326-sitrep-66-covid-19.pdf?sfvrsn=9e5b8b48_2)  
19  
20 524 [reports/20200326-sitrep-66-covid-19.pdf?sfvrsn=9e5b8b48\\_2](https://www.who.int/docs/default-source/coronaviruse/situation-reports/20200326-sitrep-66-covid-19.pdf?sfvrsn=9e5b8b48_2). Cited 2021 May 30.  
21  
22  
23 525 4. Spiteri G, Fielding J, Diercke M, Campese C, Enouf V, Gaymard A, et al. First cases of  
24  
25 526 coronavirus disease 2019 (COVID-19) in the WHO European Region, 24 January to 21  
26  
27 527 February 2020. *Eurosurveillance* 2020 (25): 2000178.  
28  
29  
30 528 5. UK Government (a) (2020) Oral statement to Parliament, Controlling the spread of  
31  
32 529 COVID-19: Health Secretary's statement to Parliament. 16 Mar 2020.  
33  
34 530 [www.gov.uk/government/speeches/controlling-the-spread-of-covid-19-health-secretarys-](http://www.gov.uk/government/speeches/controlling-the-spread-of-covid-19-health-secretarys-statement-to-parliament)  
35  
36 531 [statement-to-parliament](http://www.gov.uk/government/speeches/controlling-the-spread-of-covid-19-health-secretarys-statement-to-parliament). Cited 2021 May 25.  
37  
38  
39 532 6. UK Government (b) (2020) Guidance: Oral statement to and away from others (social  
40  
41 533 distancing). 23 Mar 2020. [https://www.gov.uk/government/publications/full-guidance-on-](https://www.gov.uk/government/publications/full-guidance-on-staying-at-home-and-away-from-others)  
42  
43 534 [staying-at-home-and-away-from-others](https://www.gov.uk/government/publications/full-guidance-on-staying-at-home-and-away-from-others). Cited 2020 Sept 5.  
44  
45  
46 535 7. NHS England (2020a) Next steps on NHS response to COVID-19: Letter from Sir Simon  
47  
48 536 Stevens and Amanda Pritchard. 17 Mar 2020.  
49  
50 537 [www.england.nhs.uk/coronavirus/publication/next-steps-on-nhs-response-to-covid-19-](http://www.england.nhs.uk/coronavirus/publication/next-steps-on-nhs-response-to-covid-19-letter-from-simon-stevens-and-amanda-pritchard)  
51  
52 538 [letter-from-simon-stevens-and-amanda-pritchard](http://www.england.nhs.uk/coronavirus/publication/next-steps-on-nhs-response-to-covid-19-letter-from-simon-stevens-and-amanda-pritchard). Cited 2021 May 27.  
53  
54  
55 539 8. Royal College of Surgeons. Guidance for surgeons working during the COVID-19  
56  
57 540 pandemic from the Surgical Royal Colleges of the United Kingdom and Ireland. March  
58  
59  
60

- 1  
2  
3 541 20, 2020. [www.rcseng.ac.uk/coronavirus/joint-guidance-for-surgeons-v1](http://www.rcseng.ac.uk/coronavirus/joint-guidance-for-surgeons-v1). Cited 2021  
4  
5 542 May 28.
- 6  
7  
8 543 9. British Orthopaedic Association. British Orthopaedic Association for Standards of  
9  
10 544 Trauma (BOAST). Management of patients with urgent orthopaedic conditions and  
11  
12 545 trauma during the coronavirus pandemic. March 24, 2020.  
13  
14 546 [www.boa.ac.uk/resources/statement-for-boa-members-on-trauma-and-orthopaedic-care-](http://www.boa.ac.uk/resources/statement-for-boa-members-on-trauma-and-orthopaedic-care-in-the-uk-during-coronavirus-pandemic.html)  
15  
16 547 [in-the-uk-during-coronavirus-pandemic.html](http://www.boa.ac.uk/resources/statement-for-boa-members-on-trauma-and-orthopaedic-care-in-the-uk-during-coronavirus-pandemic.html). Cited 2021 May 28.
- 17  
18  
19 548 10. Park C, Sugand K, Nathwani D, Bhattacharya R, Sarraf KM. Impact of the COVID-19  
20  
21 549 pandemic on orthopaedic trauma workload in a London level 1 trauma centre: the "golden  
22  
23 550 month". *Acta Orthop*. 2020 Jun 23;1-6.
- 24  
25  
26 551 11. Murphy T, Akehurst H, Mutimer J. Impact of the 2020 COVID-19 pandemic on the  
27  
28 552 workload of the orthopaedic service in a busy UK district general hospital. *Injury*  
29  
30 553 2020;S0020-1383(20)30560-X.
- 31  
32  
33 554 12. Elhalawany A, Beastall J, Cousins G. The impact of the COVID-19 lockdown on  
34  
35  
36 555 orthopaedic emergency presentations in a remote and rural population, *Bone Joint Open*.  
37  
38 556 2020;1(10): 621-627.
- 39  
40  
41  
42  
43 557 13. Karia M, Gupta V, Zahra W, et al. The effect of COVID-19 on the trauma burden, theatre  
44  
45  
46 558 efficiency and training opportunities in a district general hospital: planning for a future  
47  
48 559 outbreak, *Bone Joint Open*. 2020;1-8:494–499.
- 49  
50  
51  
52  
53 560 14. COVIDSurg Collaborative. Mortality and pulmonary complications in patients  
54  
55 561 undergoing surgery with perioperative SARS-CoV-2 infection: an international cohort  
56  
57 562 study. *Lancet*. 2020 May 29.
- 58  
59  
60



- 1  
2  
3  
4 563 15. British Orthopaedic Association. British Orthopaedic Association Standards for Trauma.  
5  
6  
7 564 January 2012. BOAST 1 Version 2 - Patients sustaining a Fragility Hip Fracture.  
8  
9  
10 565 [www.boa.ac.uk/uploads/assets/6750e0bf-4aa3-4680-](http://www.boa.ac.uk/uploads/assets/6750e0bf-4aa3-4680-b1612265704512db/patients%20sustaining%20a%20fragility%20hip%20fracture.pdf)  
11  
12 566 [b1612265704512db/patients%20sustaining%20a%20fragility%20hip%20fracture.pdf](http://www.boa.ac.uk/uploads/assets/6750e0bf-4aa3-4680-b1612265704512db/patients%20sustaining%20a%20fragility%20hip%20fracture.pdf).  
13  
14 567 Cited 2021 May 25.  
15  
16  
17 568 16. Atia F, Pocnetz S, Selby A, et al. The effect of the COVID-19 lockdown on hand trauma  
18  
19  
20 569 surgery utilization. *Bone Jt Open*. 2020;1(10):639-643.  
21  
22  
23  
24 570 17. Esteban PL, Querolt Coll J, Xicola Martínez M, et al. Has COVID-19 affected the  
25  
26  
27 571 number and severity of visits to a traumatology emergency department? *Bone Jt Open*.  
28  
29  
30 572 2020;1(10):617-620.  
31  
32  
33  
34 573 18. Dayananda KSS, Mercer ST, Agarwal R, et al. A comparative review of 1,004  
35  
36 574 orthopaedic trauma patients before and during the COVID-19 pandemic. *Bone Jt Open*.  
37  
38 575 2020;1(8):568-575.  
39  
40  
41 576 19. Dayananda KSS, Mercer ST, Agarwal R, et al. A comparative review of 1,004  
42  
43 577 orthopaedic trauma patients before and during the COVID-19 pandemic. *Bone Jt Open*.  
44  
45 578 2020;1(8):568-575.  
46  
47  
48 579 20. Arafa M, Nesar S, Abu-Jabeh H, et al. COVID-19 pandemic and hip fractures: impact  
49  
50 580 and lessons learned, *Bone Joint Open*. 2020;1-9:530–540.  
51  
52  
53 581 21. Kayani B, Onochie E, Patil V, Begum F, Cuthbert R, Ferguson D, et al. The effects of  
54  
55 582 COVID-19 on perioperative morbidity and mortality in patients with hip fractures. *Bone*  
56  
57 583 *Joint J*. 2020;1-10.  
58  
59  
60

- 1  
2  
3 584 22. Hall AJ, Clement ND, Farrow L, IMPACT-Scot Study Group, MacLulich AMJ, Dall  
4  
5 585 GF, et al. IMPACT-Scot report on COVID-19 and hip fractures. *Bone Joint J.* 2020;1-10.  
6  
7  
8 586 23. Clement ND, Hall AJ, Makaram NS, et al. IMPACT-Restart: the influence of COVID-19  
9  
10  
11 587 on postoperative mortality and risk factors associated with SARS-CoV-2 infection after  
12  
13  
14 588 orthopaedic and trauma surgery. *Bone Joint J.* 2020;102-B(12):1774-1781.  
15  
16  
17  
18 589 24. Mackay N, Wilding C, Langley C, et al. The impact of COVID-19 on trauma and  
19  
20  
21 590 orthopaedic patients requiring surgery during the peak of the pandemic. *Bone Jt Open.*  
22  
23  
24 591 2020;1-9:520–529.  
25  
26  
27  
28 592 25. Kader N. Clement ND. Patel VR. Cablan N. Banaszkiwicz P. Kader D. The theoretical  
29 593 mortality risk of an asymptomatic patient with a negative SARS-CoV-2 test developing  
30  
31  
32 594 COVID-19 following elective orthopaedic surgery. *Bone Joint J.* 2020;1-5.  
33  
34  
35  
36 595 26. Service BC, Collins AP, Crespo A, Couto P, Gupta S, Avilucea F, et al. Medically  
37  
38  
39 596 necessary orthopaedic surgery during the COVID-19 pandemic: safe surgical practices  
40  
41  
42 597 and a classification to guide treatment. *JBJS.* 2020 Jul 15;102(14):e76.  
43  
44  
45  
46 598 27. Dean BJF; Corona Hands Collaborative. Mortality and pulmonary complications in  
47  
48  
49 599 patients undergoing upper extremity surgery at the peak of the SARS-CoV-2 pandemic in  
50  
51  
52 600 the UK: a national cohort study. *BMJ Qual Saf.* 2020:bmjqs-2020-012156.  
53  
54  
55  
56  
57  
58  
59  
60

- 1  
2  
3  
4 601 28. Salottolo K, Caiafa R, Mueller J, et al. Multicenter study of US trauma centres examining  
5  
6  
7 602 the effect of the COVID-19 pandemic on injury causes, diagnoses and procedures Trauma  
8  
9  
10 603 Surgery & Acute Care Open 2021;6:e000655.  
11  
12  
13 604 29. Cheruvu MS, Bhachu DS, Mulrain J, et al. Effect of COVID-19 on a rural orthopaedic  
14  
15  
16  
17 605 hip fracture service. Bone Jt Open. 2020;1(8):500-507.  
18  
19  
20 606 30. Lewis PM, Waddell JP. When is the ideal time to operate on a patient with a fracture of  
21  
22  
23  
24 607 the hip? : a review of the available literature. Bone Joint J. 2016;98-B(12):1573-1581.  
25  
26  
27 608 31. Adebowale V, Alderson D, Burn W, Dickson J, Godlee F, Goddard A, et al. Covid-19:  
28  
29  
30 609 Call for a rapid forward looking review of the UK's preparedness for a second wave-an  
31  
32  
33  
34 610 open letter to the leaders of all UK political parties [published correction appears in BMJ.  
35  
36  
37 611 2020 Jul 16;370:m2866. Dixon, Jeanette [corrected to Dickson, Jeanette]]. *BMJ*.  
38  
39  
40 612 2020;369:m2514. Published 2020 Jun 23.  
41  
42  
43  
44  
45  
46  
47  
48  
49  
50  
51  
52  
53  
54  
55  
56  
57  
58  
59  
60



Figure 1b: Types and mechanisms of injuries for operative cases

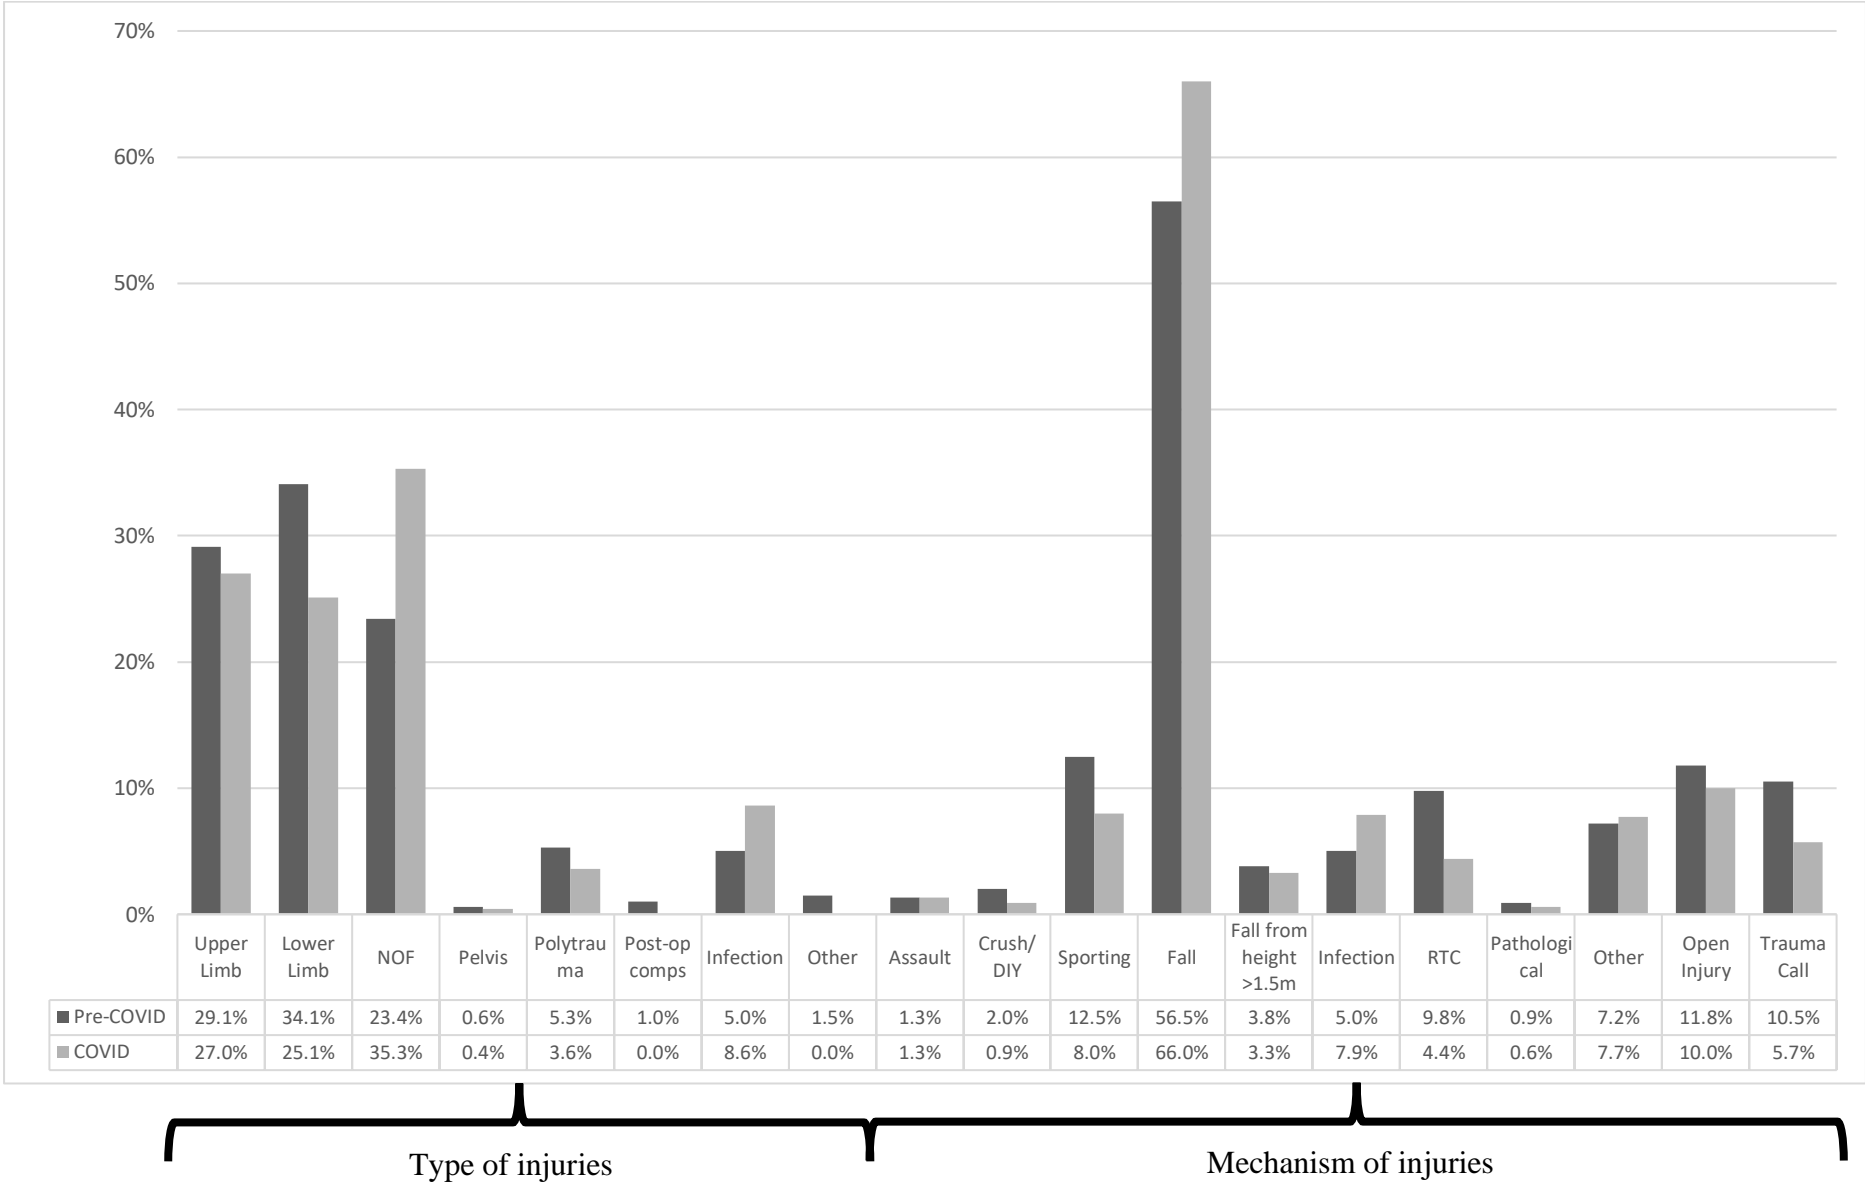

Figure 2: operative and anaesthetic techniques compared between pre- and post-COVID

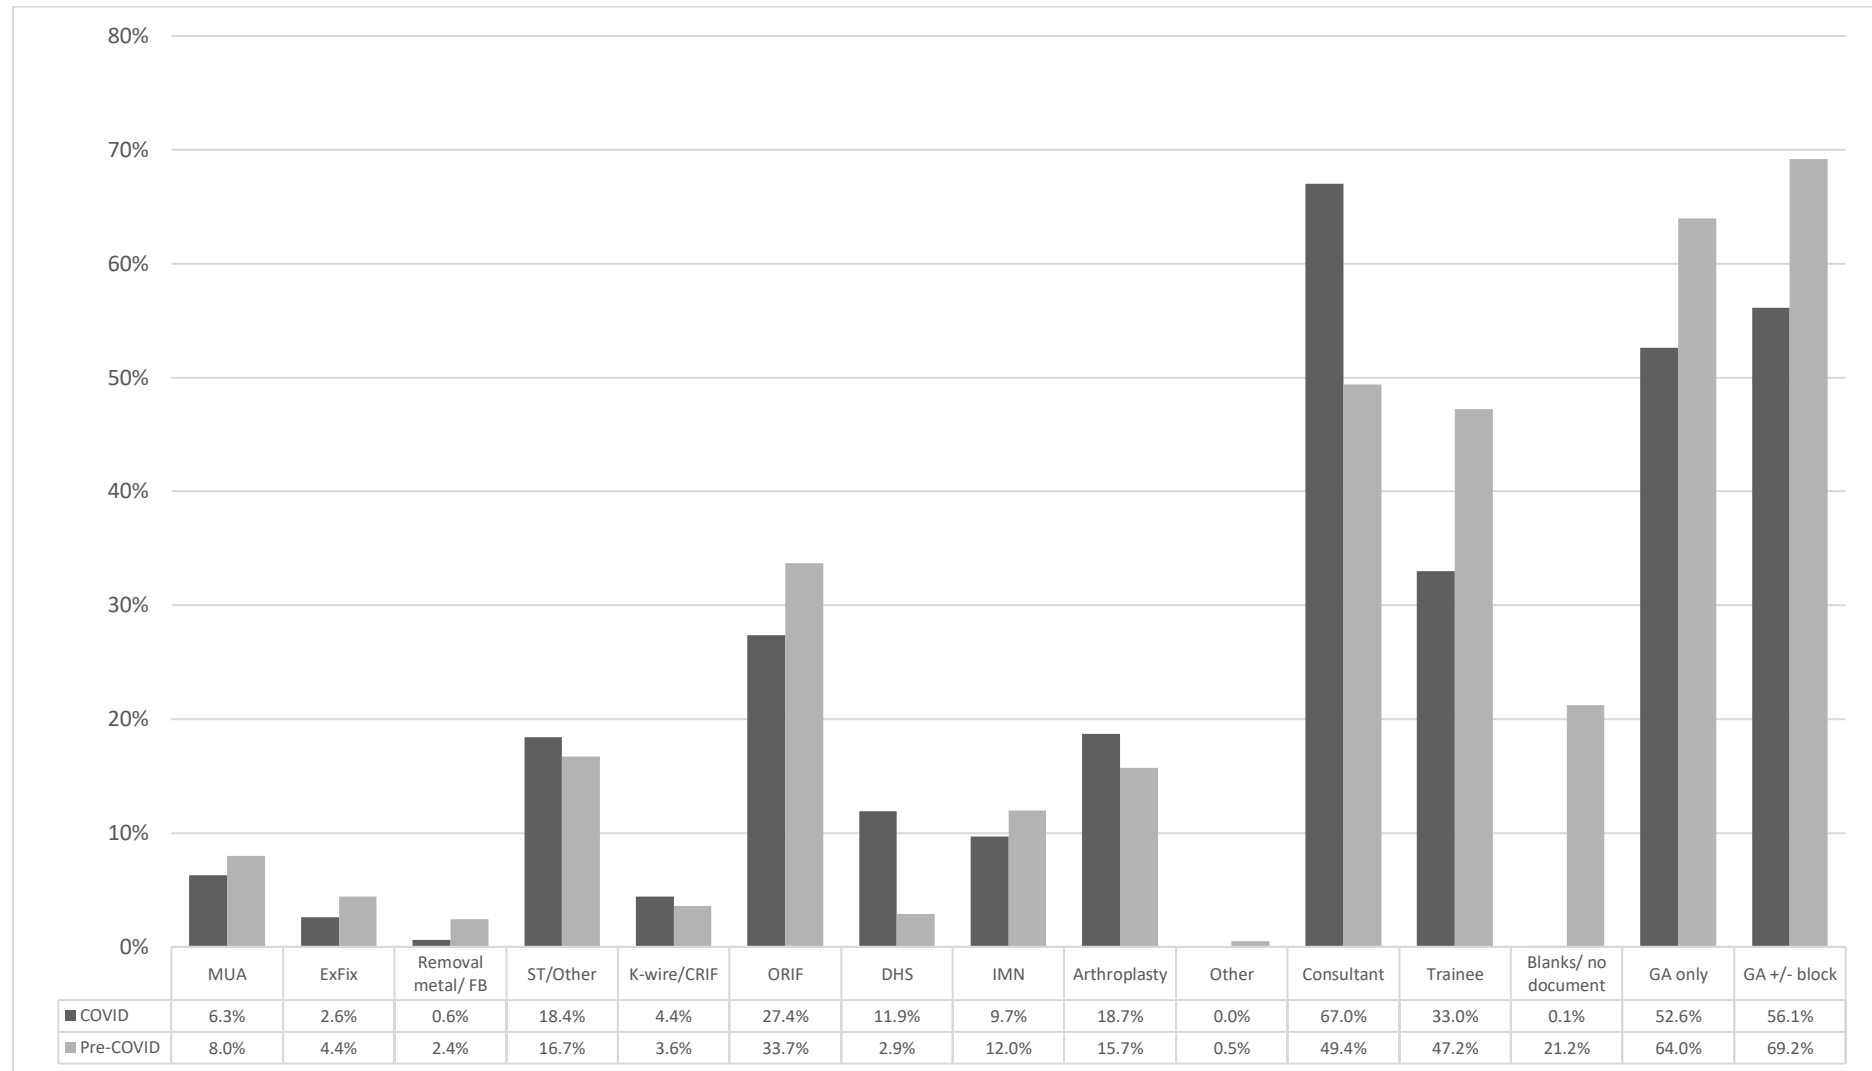

S

Type of injuries
Primary surgeon
Anaesthetic technique

For peer review only - <http://bmjopen.bmj.com/site/about/guidelines.xhtml>

Figure 3: COVID status for acute referrals and operative cases as a measure of proportions (with 5% error bars)

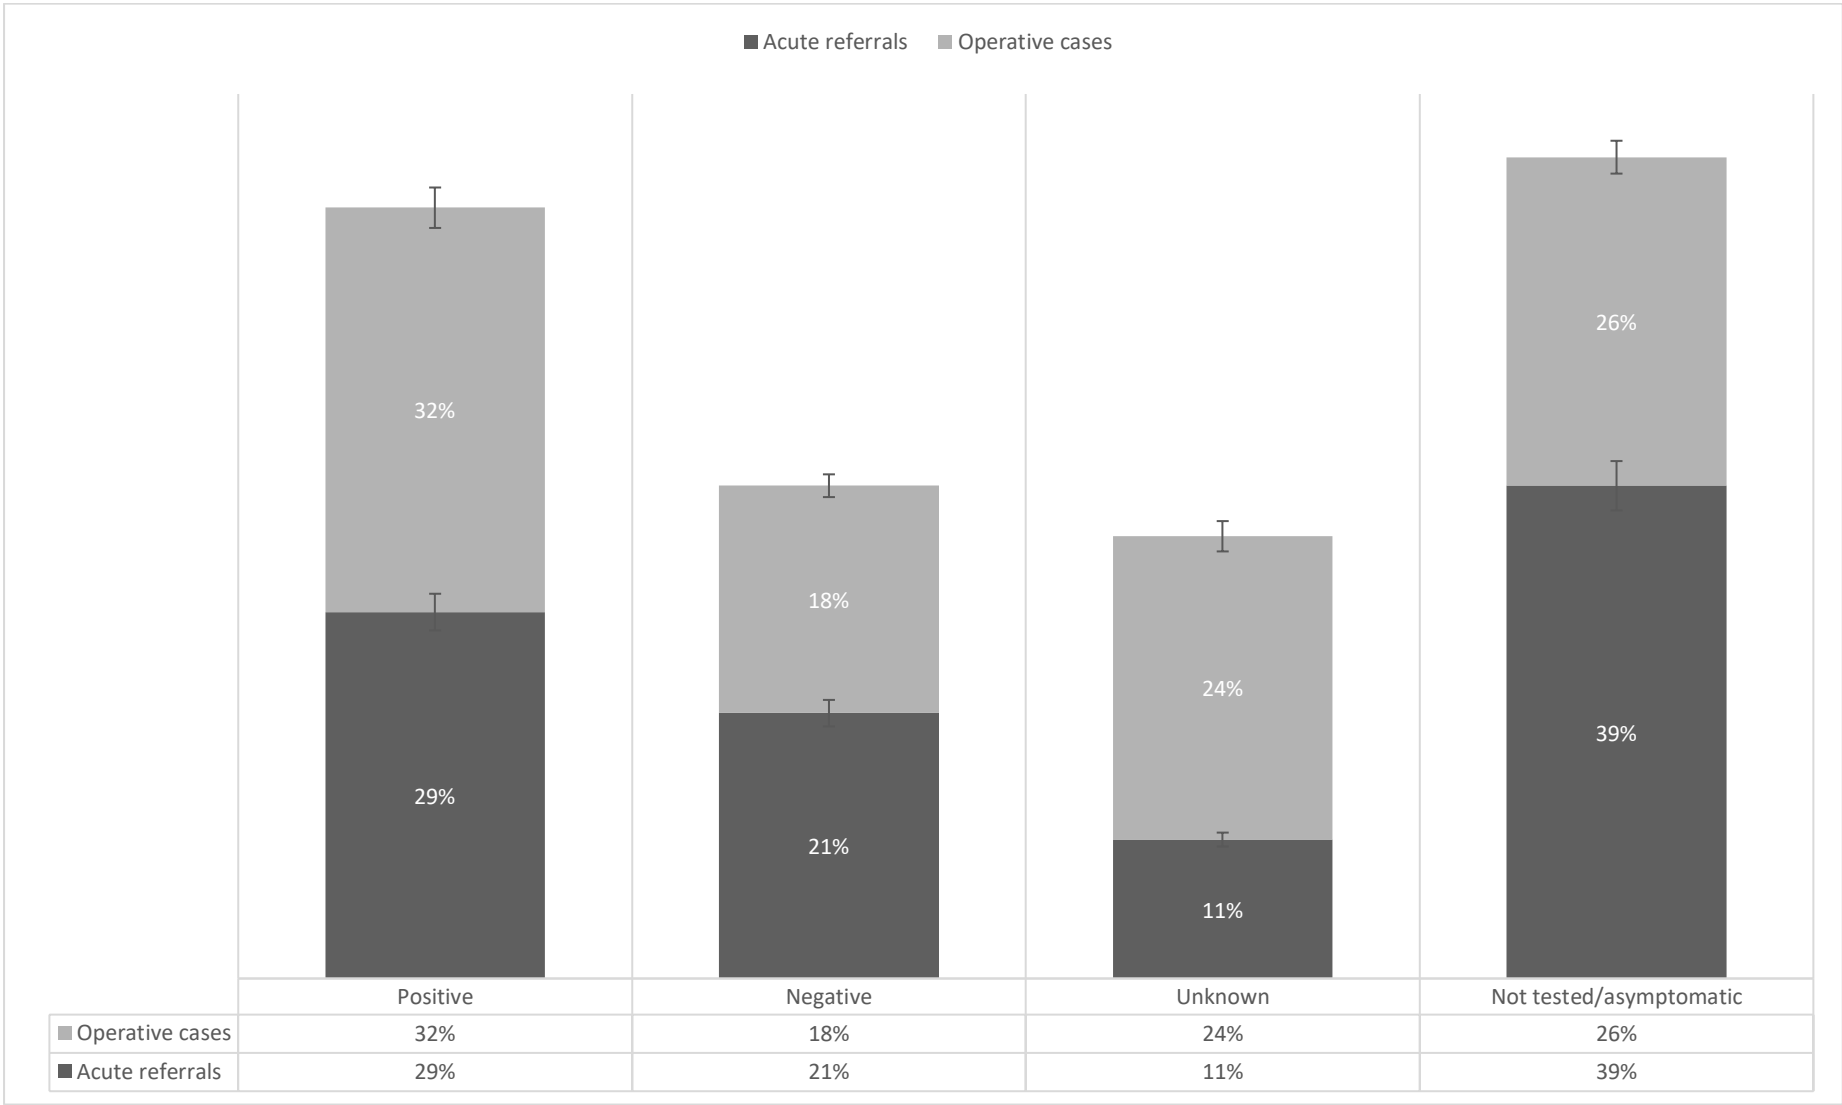

Figure 4: COVID status of all mortalities (with 5% error bars)

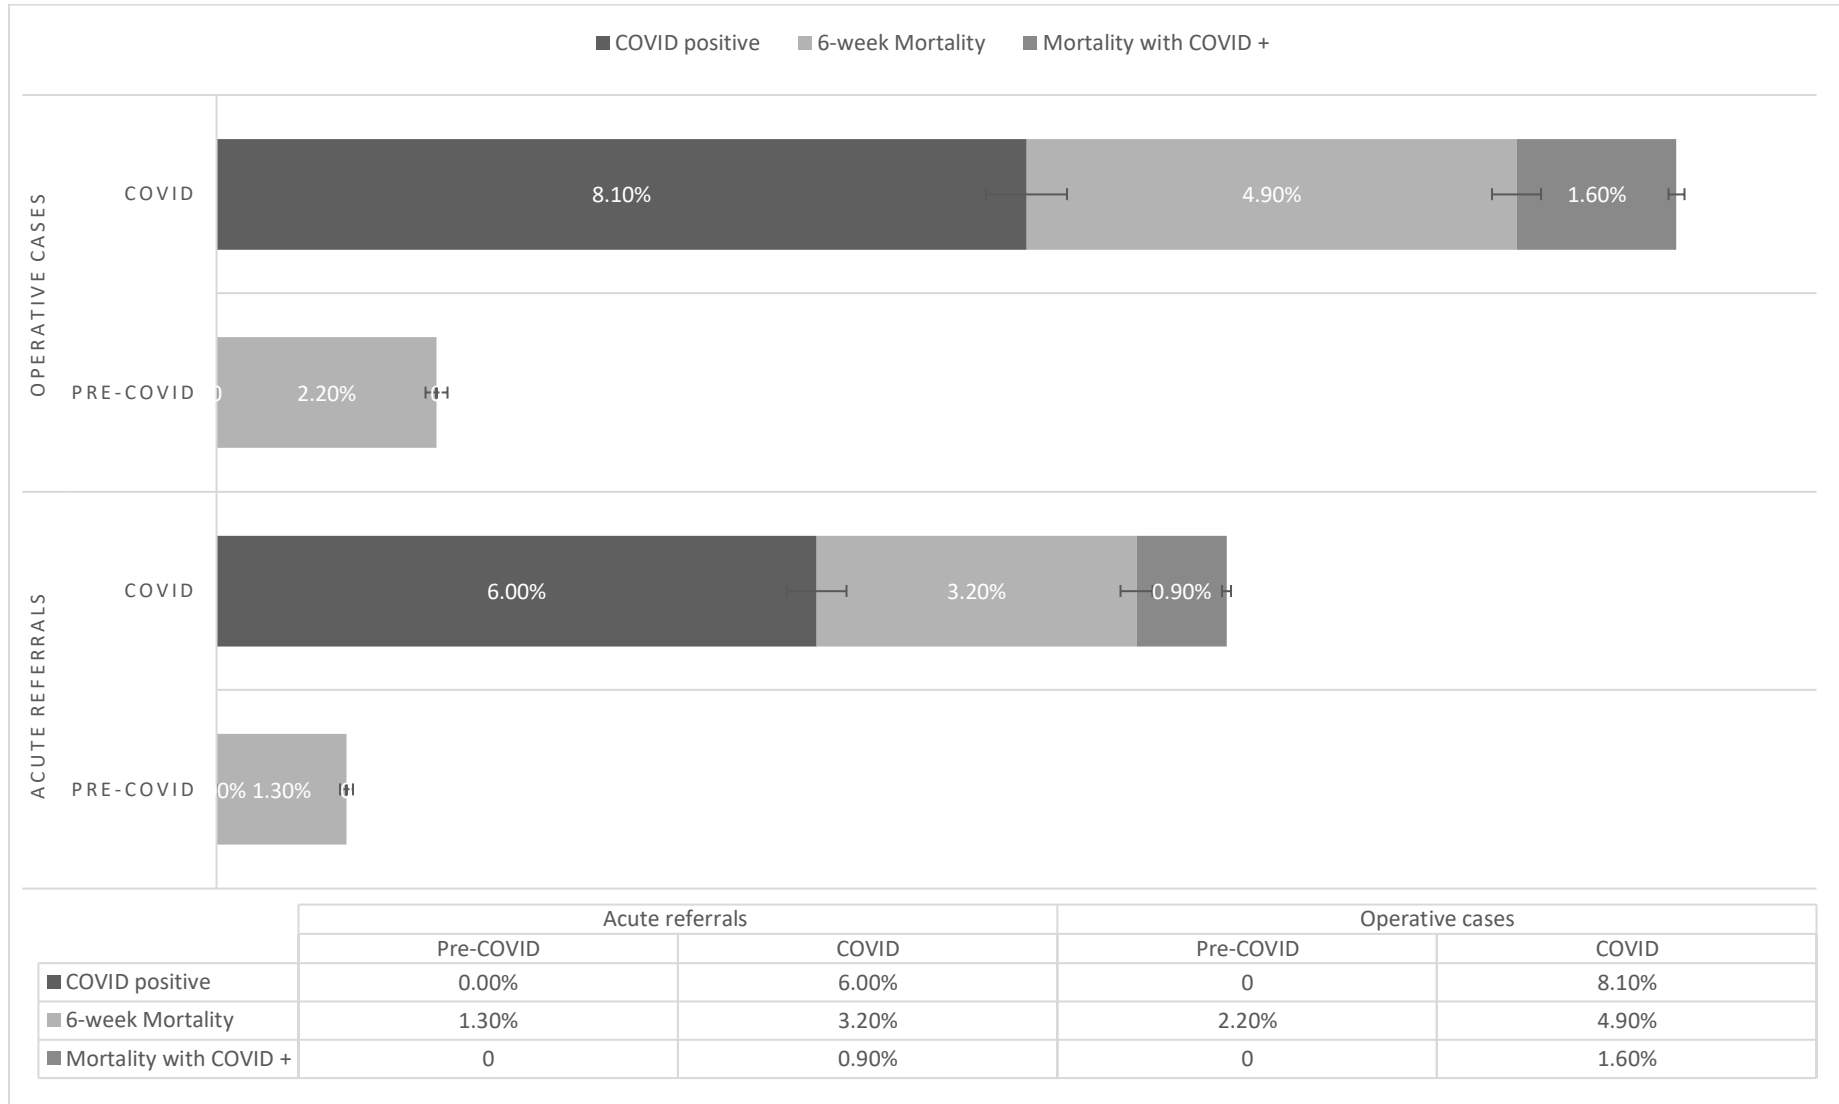



Figure 5a: types and mechanism of injury for mortalities in acute referral cohorts

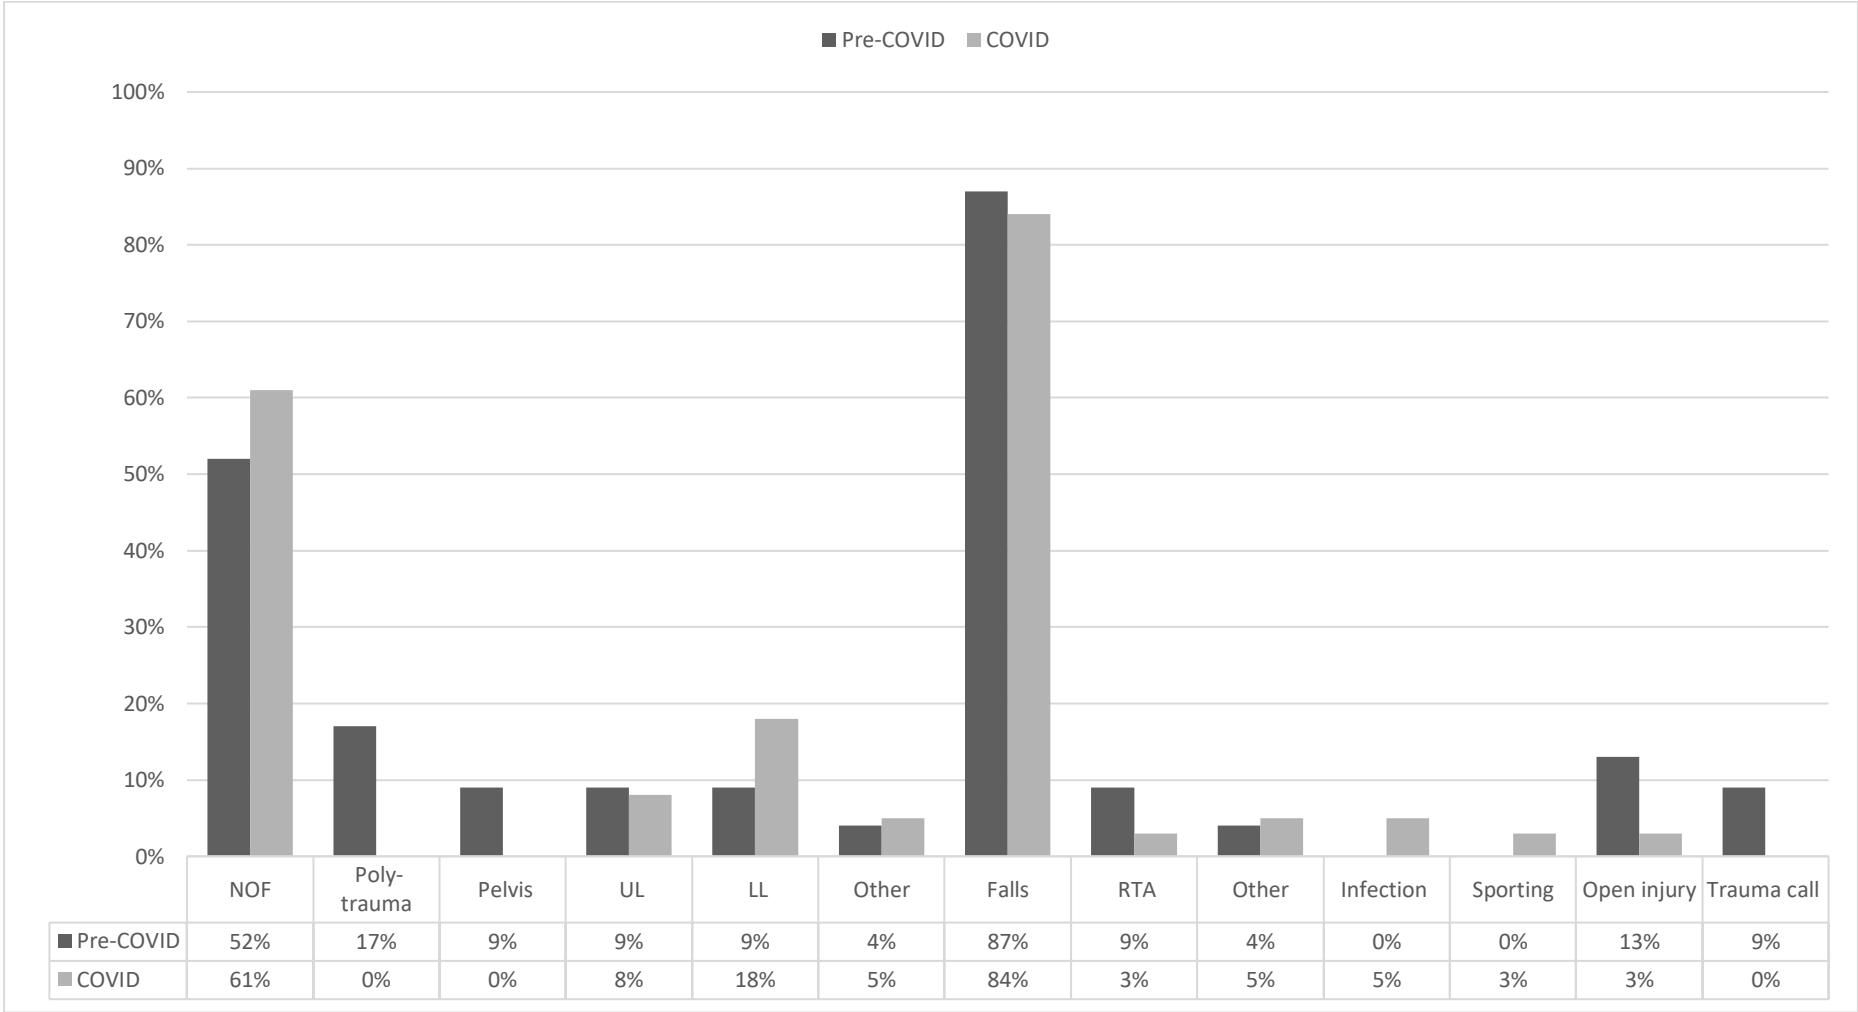

Key: UL: upper limb / LL: lower limb / RTA: road traffic accidents

Figure 5b: types and mechanism of injury for mortalities in operative casemix cohorts

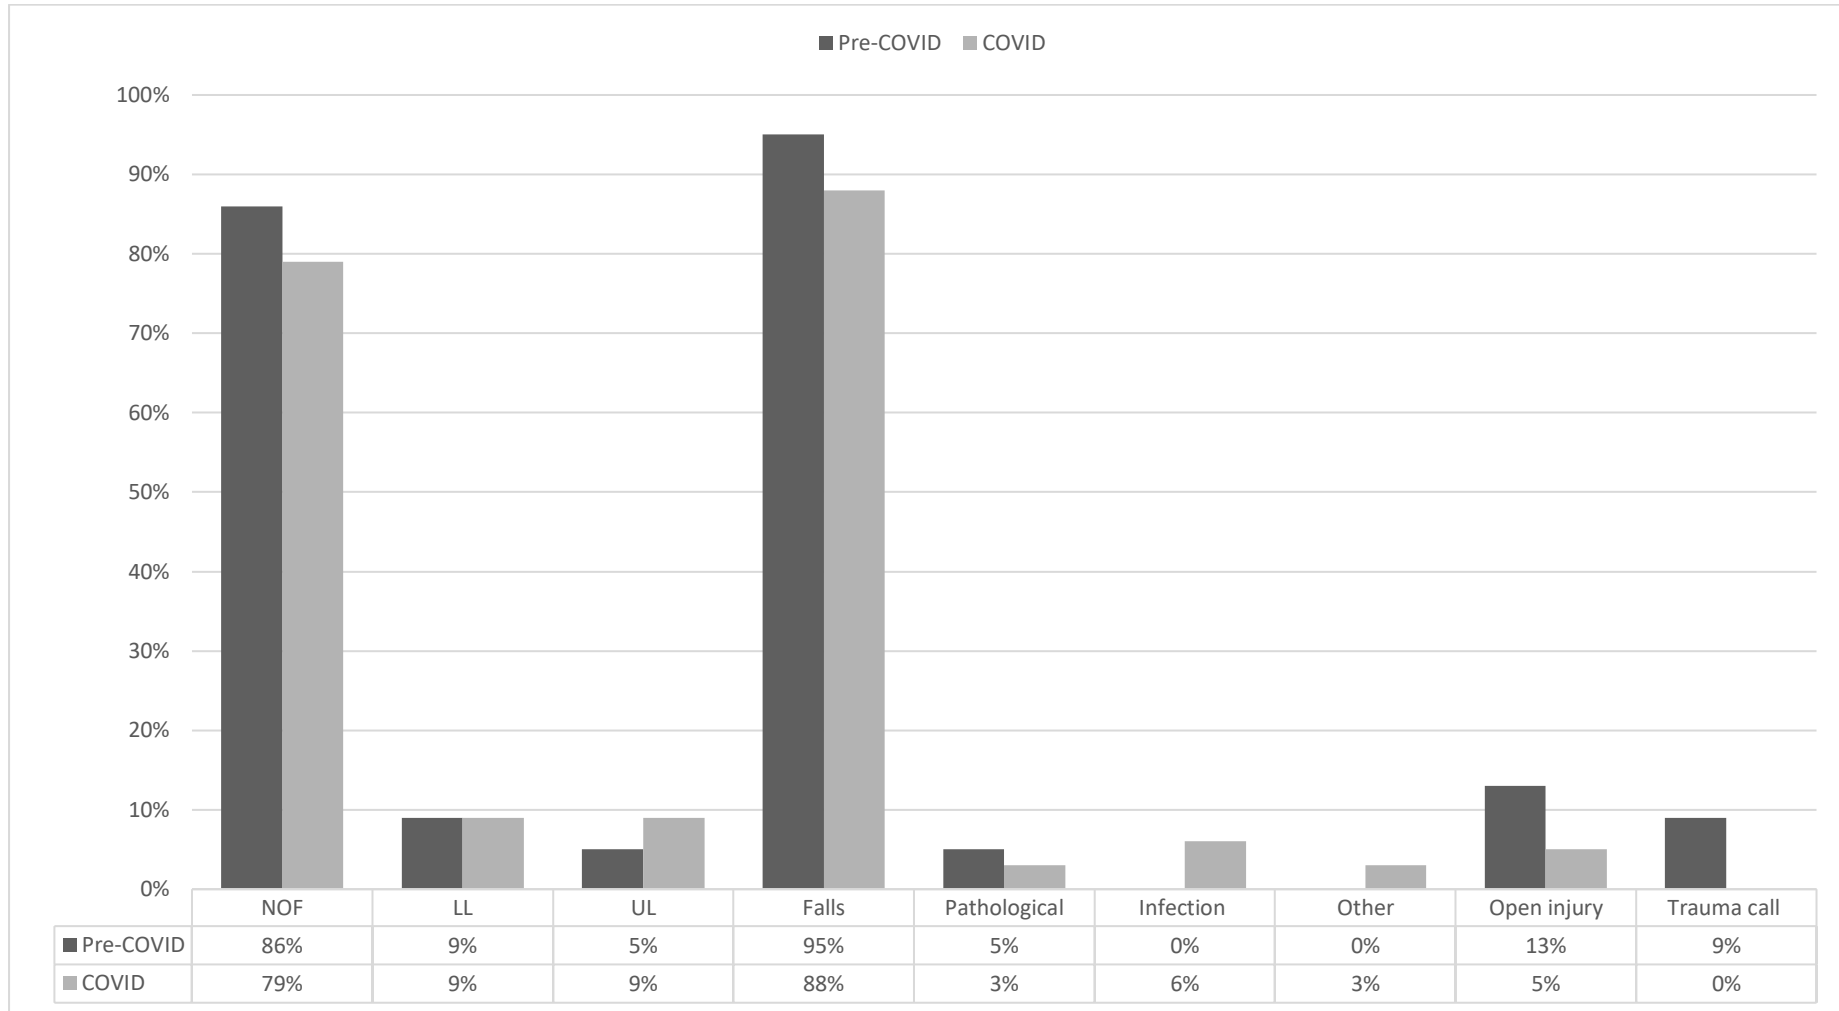

Key: NOF: neck of femur fracture / UL: upper limb / LL: lower limb

Figure 5c: Surgical and anaesthetic techniques utilized in mortalities as a means of proportions

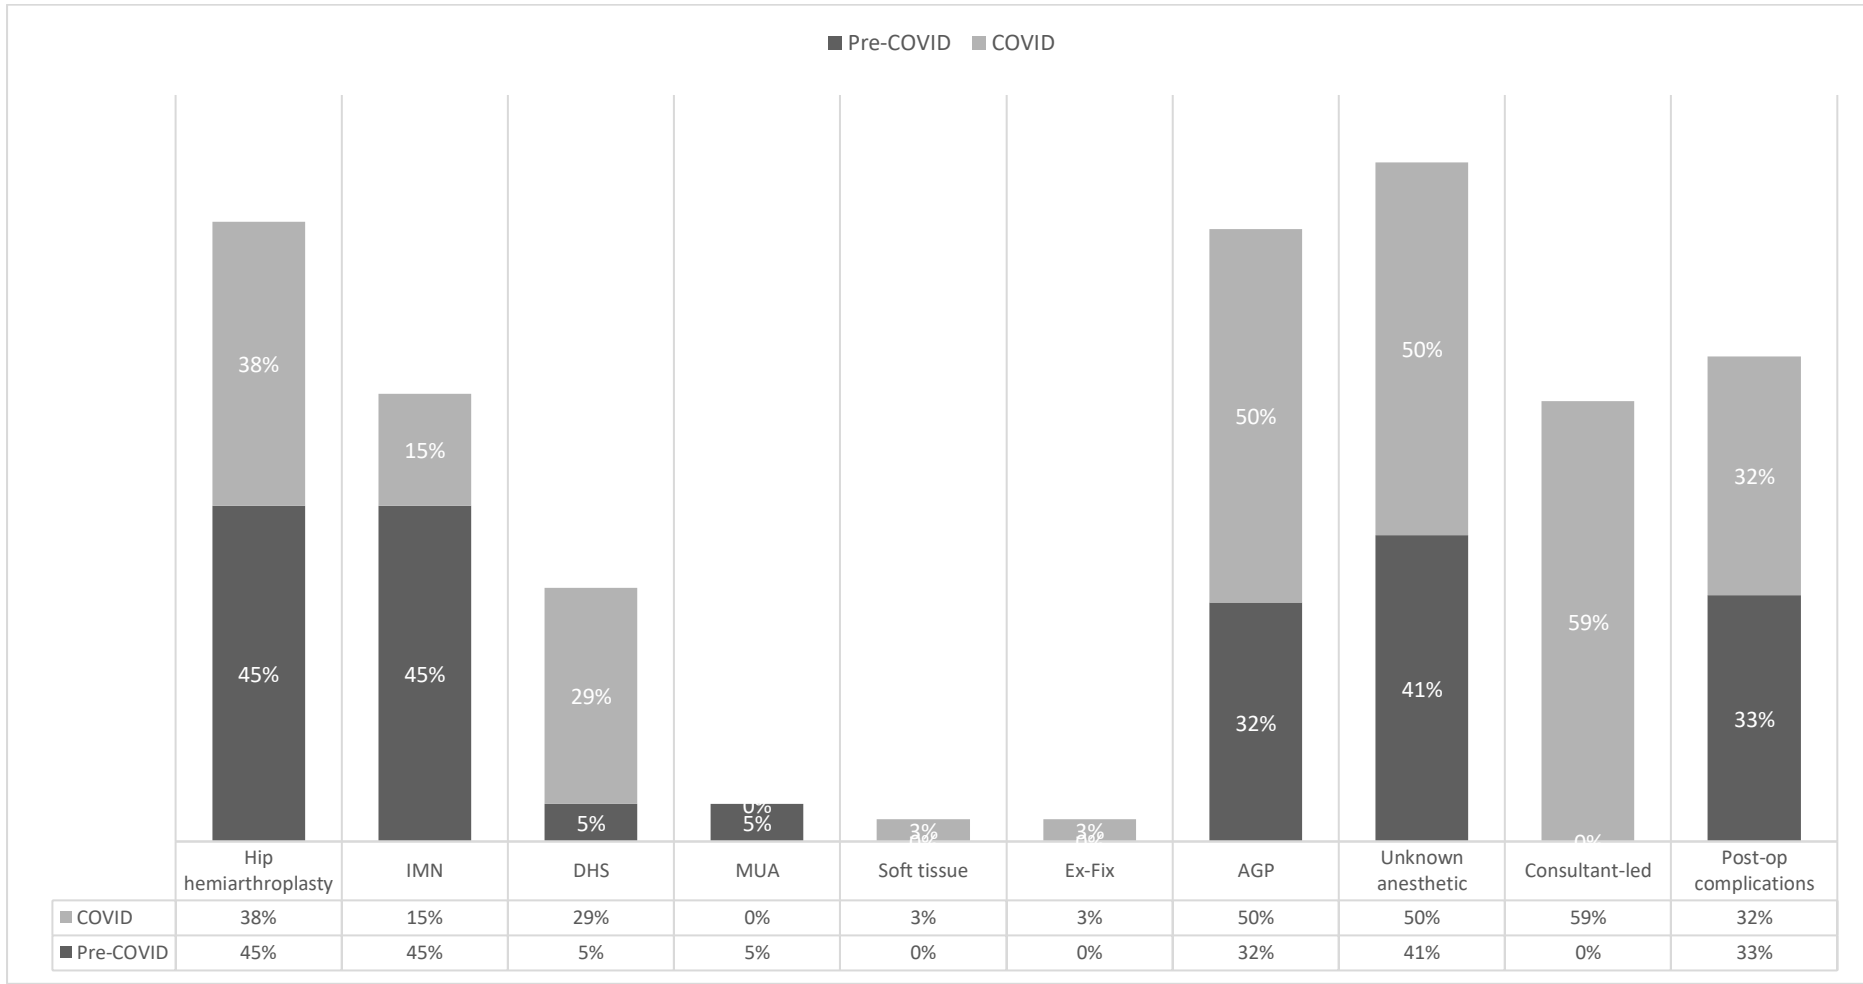

Key: IMN: intramedullary nailing / DHS: dynamic hip screw / MUA: manipulation under anaesthesia / Ex-Fix: external fixation / AGP: aerosolizing-generating procedures

Figure 6: Post-operative complications for both years

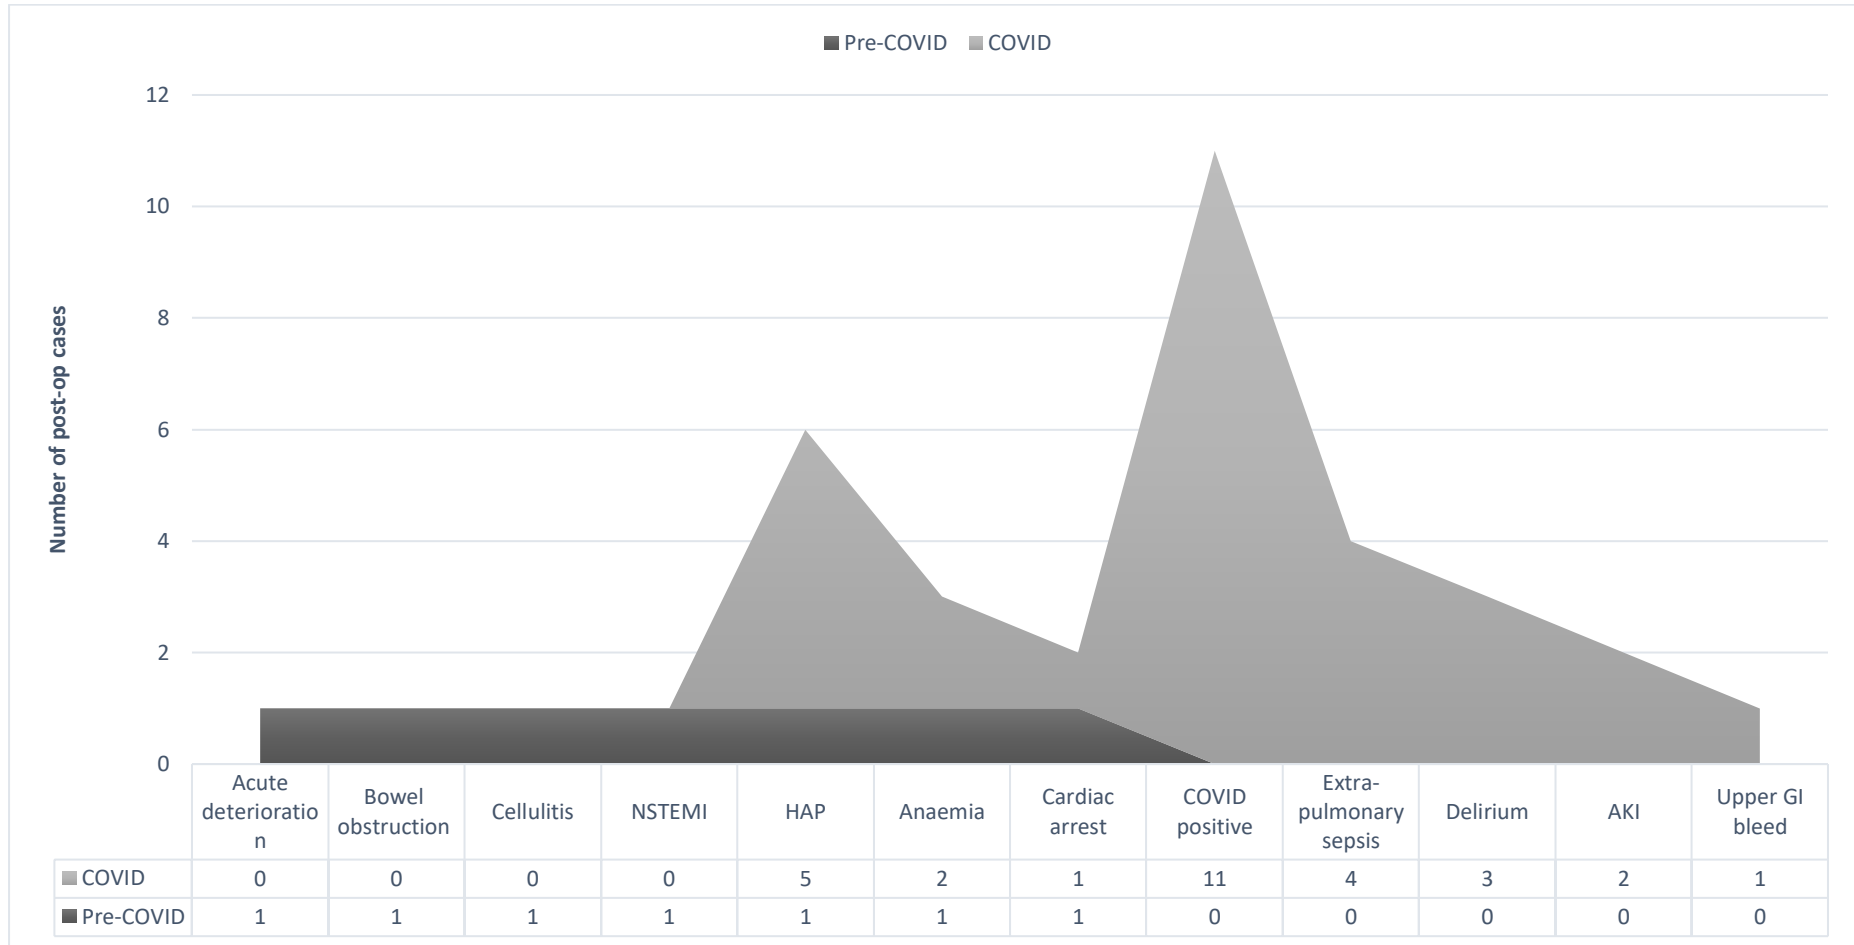

**Key:** NSTEMI: non-ST elevated myocardial infarction, HAP: hospital-acquired pneumonia, AKI: acute kidney injury, GI: gastrointestinal

Figure 7a: Type of comorbidities for all mortalities in both years

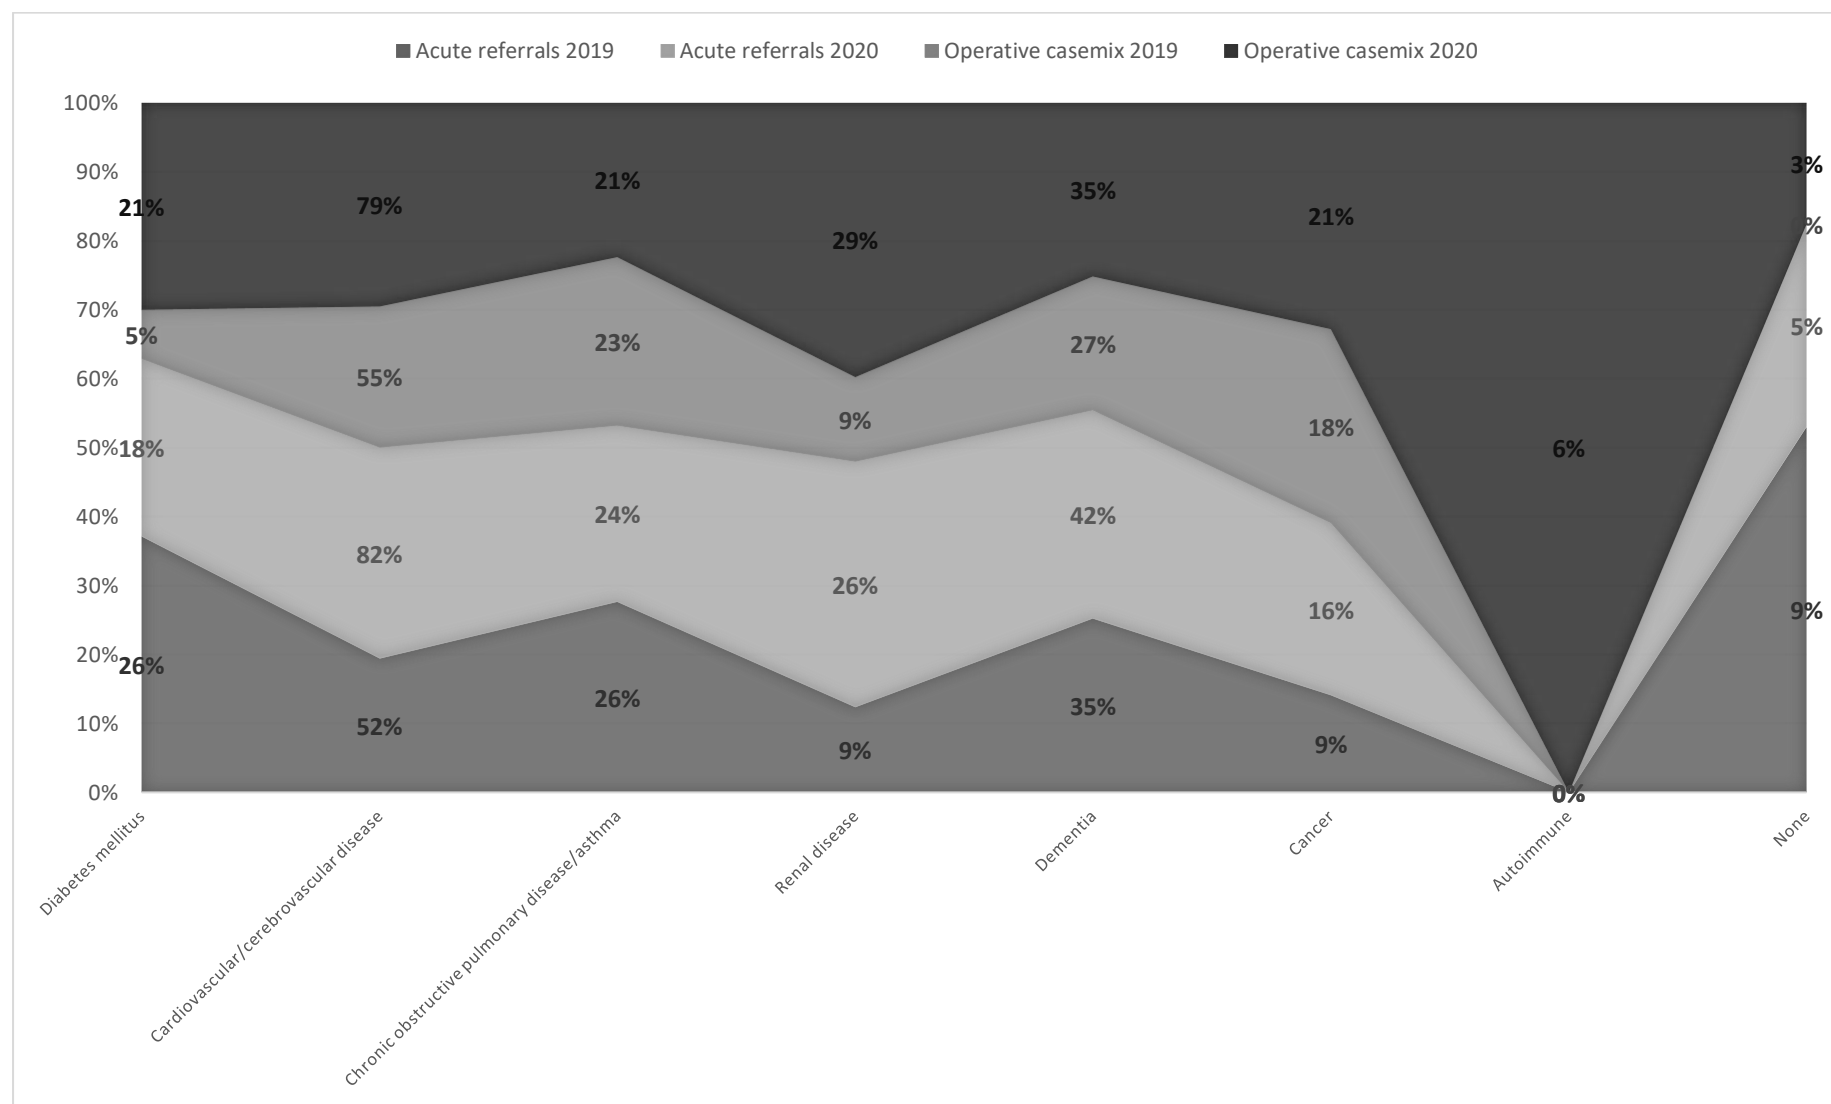

Figure 7b: number of comorbidities for all mortalities in both years

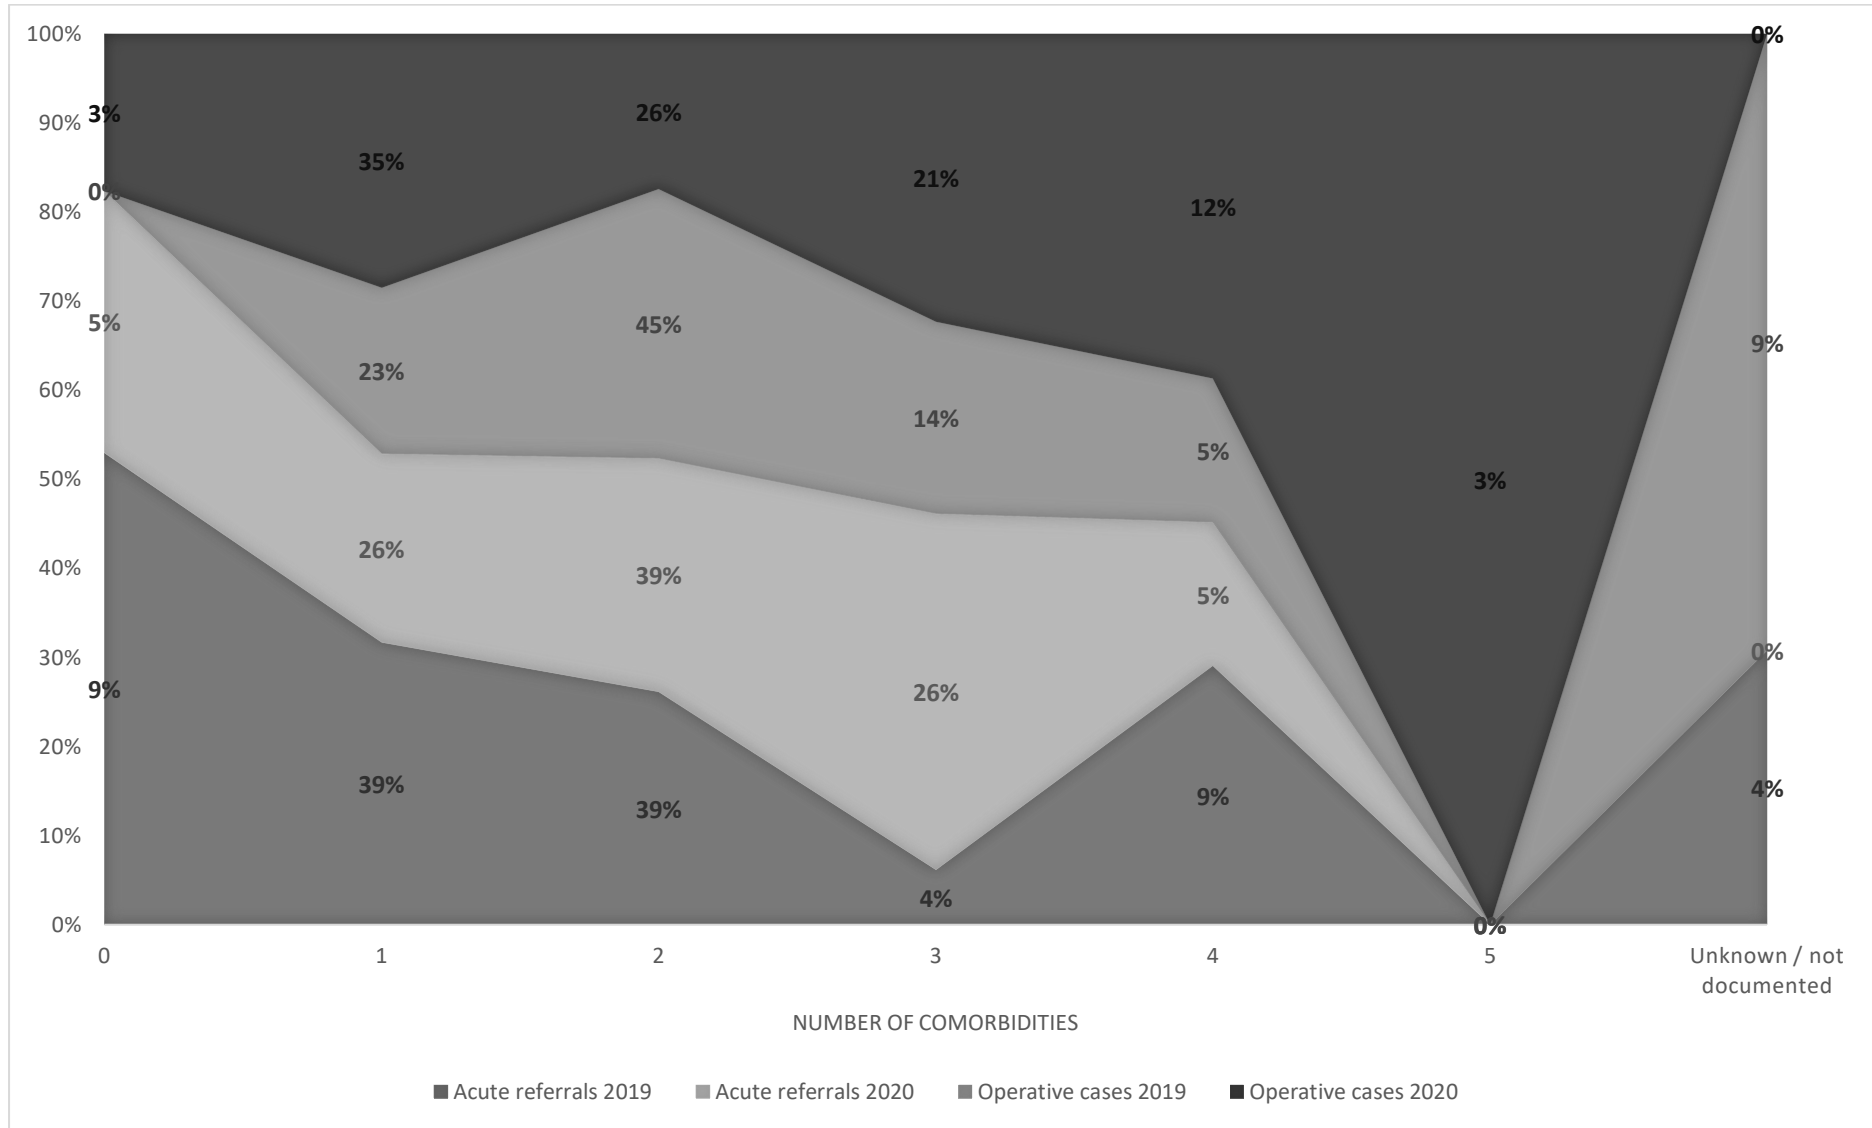

Figure 8a: Six-week Kaplan-Meier survival probability analysis for mortalities between pre- and post-COVID for acutely referred from the Emergency Department

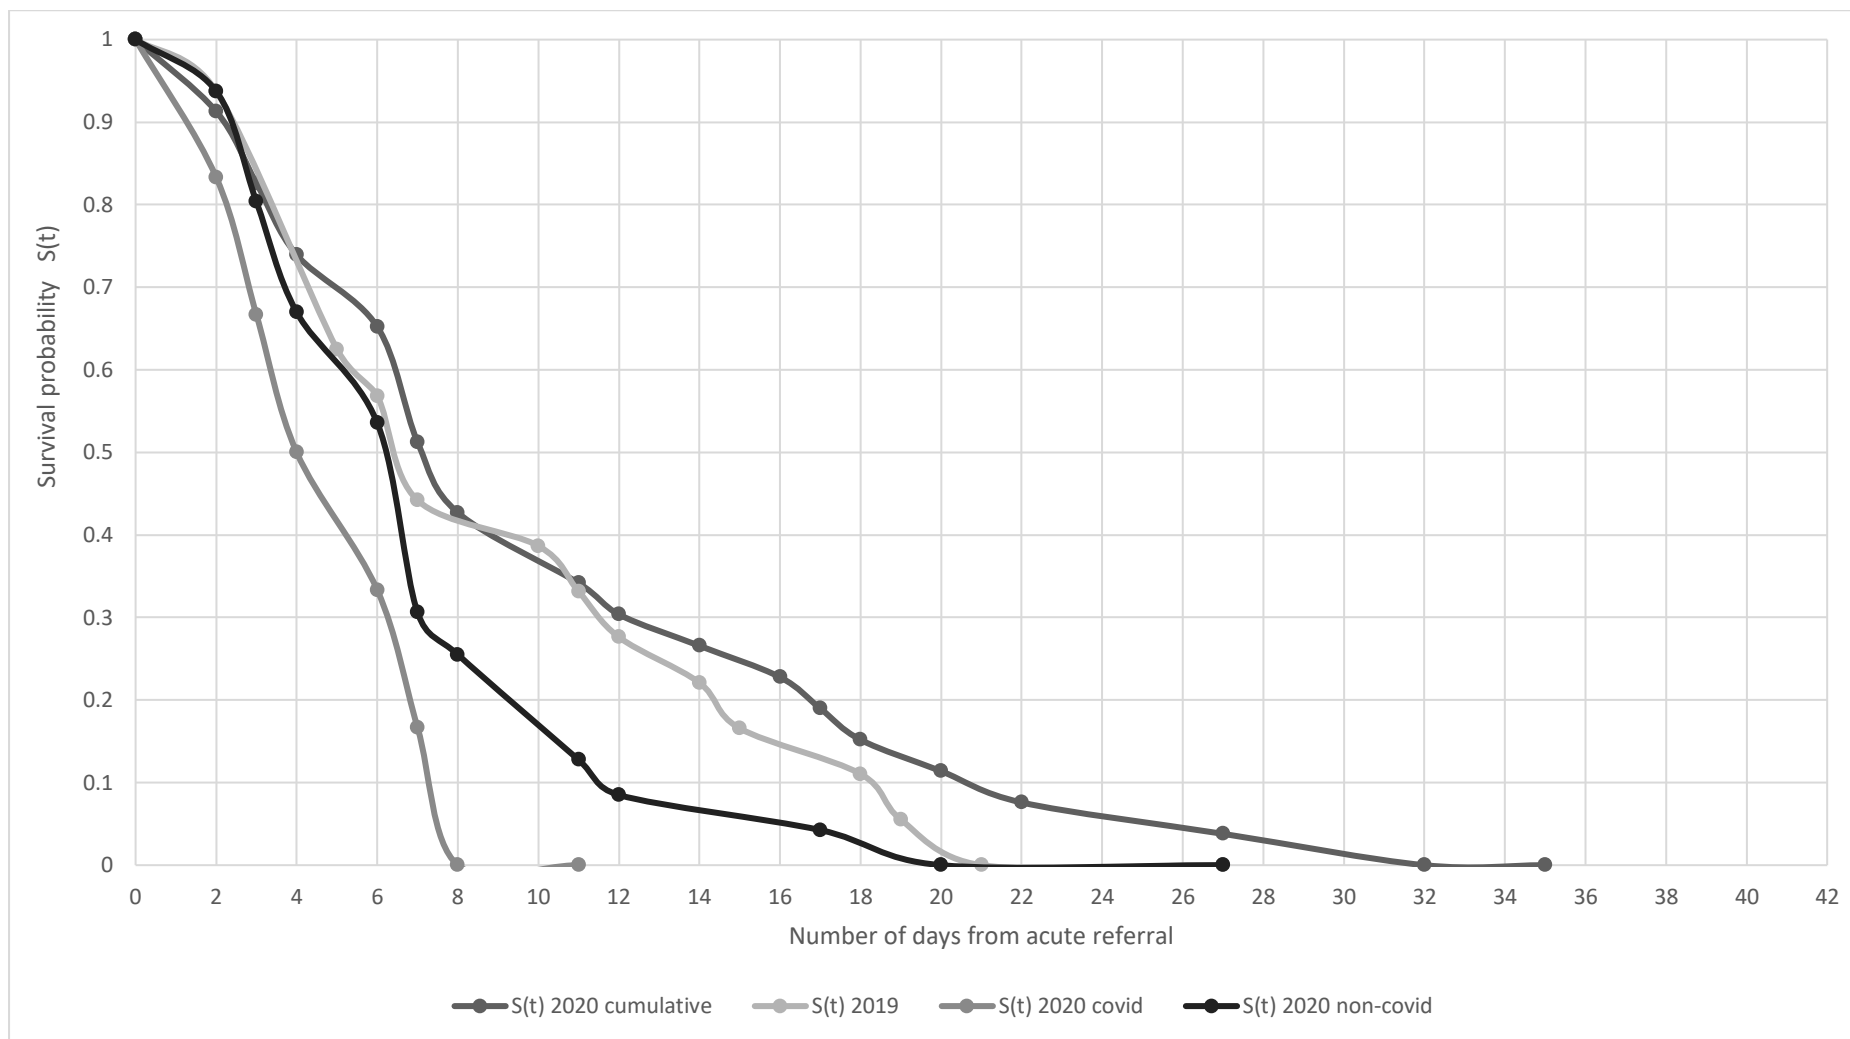

Figure 8b: Six-week Kaplan-Meier survival probability analysis for mortalities between pre- and post-COVID for those undergoing surgery

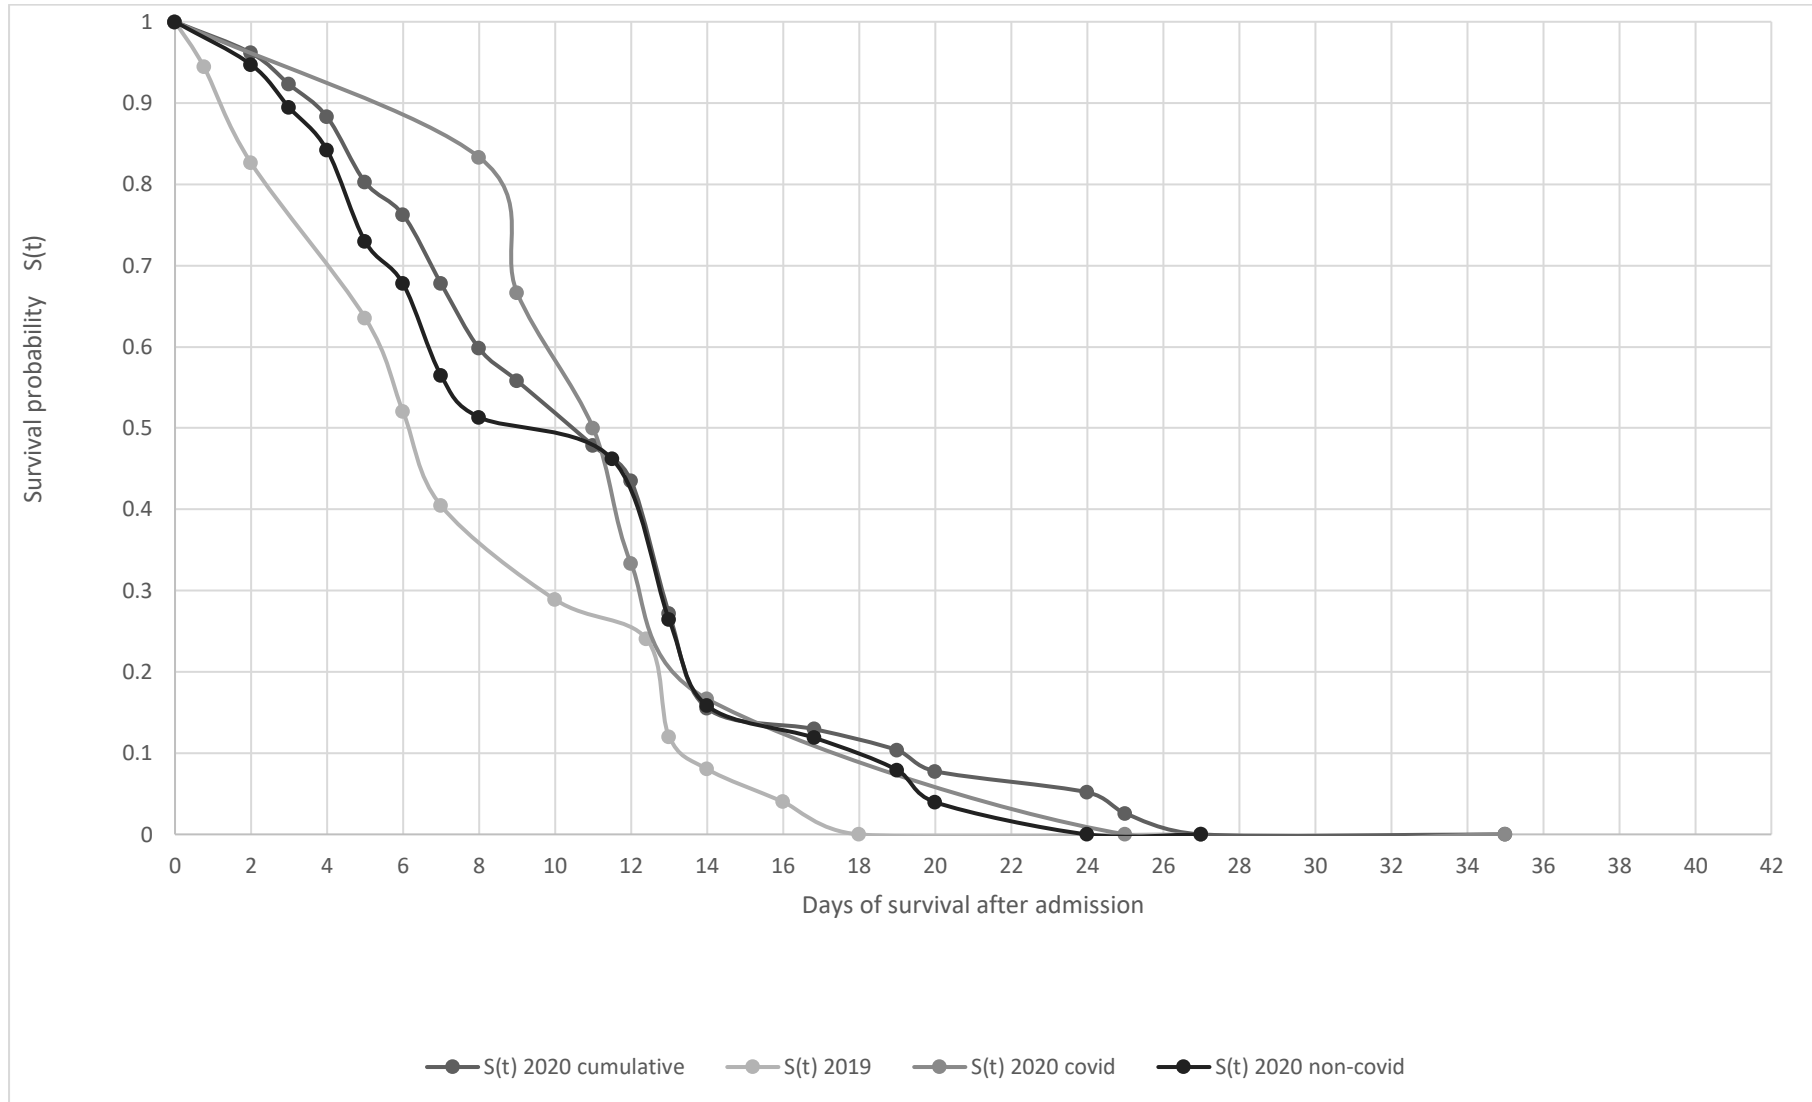



## STROBE Statement—checklist of items that should be included in reports of observational studies

|                              | Item No | Recommendation                                                                                                                                                                                                                                                                                                                                                                                                                                                                                                                                                                                                                                                                                   |
|------------------------------|---------|--------------------------------------------------------------------------------------------------------------------------------------------------------------------------------------------------------------------------------------------------------------------------------------------------------------------------------------------------------------------------------------------------------------------------------------------------------------------------------------------------------------------------------------------------------------------------------------------------------------------------------------------------------------------------------------------------|
| <b>Title and abstract</b>    | 1       | (a) Indicate the study's design with a commonly used term in the title or the abstract<br>(b) Provide in the abstract an informative and balanced summary of what was done and what was found                                                                                                                                                                                                                                                                                                                                                                                                                                                                                                    |
| <b>Introduction</b>          |         |                                                                                                                                                                                                                                                                                                                                                                                                                                                                                                                                                                                                                                                                                                  |
| Background/rationale         | 2       | Explain the scientific background and rationale for the investigation being reported                                                                                                                                                                                                                                                                                                                                                                                                                                                                                                                                                                                                             |
| Objectives                   | 3       | State specific objectives, including any prespecified hypotheses                                                                                                                                                                                                                                                                                                                                                                                                                                                                                                                                                                                                                                 |
| <b>Methods</b>               |         |                                                                                                                                                                                                                                                                                                                                                                                                                                                                                                                                                                                                                                                                                                  |
| Study design                 | 4       | Present key elements of study design early in the paper                                                                                                                                                                                                                                                                                                                                                                                                                                                                                                                                                                                                                                          |
| Setting                      | 5       | Describe the setting, locations, and relevant dates, including periods of recruitment, exposure, follow-up, and data collection                                                                                                                                                                                                                                                                                                                                                                                                                                                                                                                                                                  |
| Participants                 | 6       | (a) <i>Cohort study</i> —Give the eligibility criteria, and the sources and methods of selection of participants. Describe methods of follow-up<br><i>Case-control study</i> —Give the eligibility criteria, and the sources and methods of case ascertainment and control selection. Give the rationale for the choice of cases and controls<br><i>Cross-sectional study</i> —Give the eligibility criteria, and the sources and methods of selection of participants<br>(b) <i>Cohort study</i> —For matched studies, give matching criteria and number of exposed and unexposed<br><i>Case-control study</i> —For matched studies, give matching criteria and the number of controls per case |
| Variables                    | 7       | Clearly define all outcomes, exposures, predictors, potential confounders, and effect modifiers. Give diagnostic criteria, if applicable                                                                                                                                                                                                                                                                                                                                                                                                                                                                                                                                                         |
| Data sources/<br>measurement | 8*      | For each variable of interest, give sources of data and details of methods of assessment (measurement). Describe comparability of assessment methods if there is more than one group                                                                                                                                                                                                                                                                                                                                                                                                                                                                                                             |
| Bias                         | 9       | Describe any efforts to address potential sources of bias                                                                                                                                                                                                                                                                                                                                                                                                                                                                                                                                                                                                                                        |
| Study size                   | 10      | Explain how the study size was arrived at                                                                                                                                                                                                                                                                                                                                                                                                                                                                                                                                                                                                                                                        |
| Quantitative variables       | 11      | Explain how quantitative variables were handled in the analyses. If applicable, describe which groupings were chosen and why                                                                                                                                                                                                                                                                                                                                                                                                                                                                                                                                                                     |
| Statistical methods          | 12      | (a) Describe all statistical methods, including those used to control for confounding<br>(b) Describe any methods used to examine subgroups and interactions<br>(c) Explain how missing data were addressed<br>(d) <i>Cohort study</i> —If applicable, explain how loss to follow-up was addressed<br><i>Case-control study</i> —If applicable, explain how matching of cases and controls was addressed<br><i>Cross-sectional study</i> —If applicable, describe analytical methods taking account of sampling strategy<br>(e) Describe any sensitivity analyses                                                                                                                                |

Continued on next page

**Results**

|                  |     |                                                                                                                                                                                                                                                                                                                                                                                                               |
|------------------|-----|---------------------------------------------------------------------------------------------------------------------------------------------------------------------------------------------------------------------------------------------------------------------------------------------------------------------------------------------------------------------------------------------------------------|
| Participants     | 13* | (a) Report numbers of individuals at each stage of study—eg numbers potentially eligible, examined for eligibility, confirmed eligible, included in the study, completing follow-up, and analysed<br>(b) Give reasons for non-participation at each stage<br>(c) Consider use of a flow diagram                                                                                                               |
| Descriptive data | 14* | (a) Give characteristics of study participants (eg demographic, clinical, social) and information on exposures and potential confounders<br>(b) Indicate number of participants with missing data for each variable of interest<br>(c) <i>Cohort study</i> —Summarise follow-up time (eg, average and total amount)                                                                                           |
| Outcome data     | 15* | <i>Cohort study</i> —Report numbers of outcome events or summary measures over time<br><i>Case-control study</i> —Report numbers in each exposure category, or summary measures of exposure<br><i>Cross-sectional study</i> —Report numbers of outcome events or summary measures                                                                                                                             |
| Main results     | 16  | (a) Give unadjusted estimates and, if applicable, confounder-adjusted estimates and their precision (eg, 95% confidence interval). Make clear which confounders were adjusted for and why they were included<br>(b) Report category boundaries when continuous variables were categorized<br>(c) If relevant, consider translating estimates of relative risk into absolute risk for a meaningful time period |
| Other analyses   | 17  | Report other analyses done—eg analyses of subgroups and interactions, and sensitivity analyses                                                                                                                                                                                                                                                                                                                |

**Discussion**

|                  |    |                                                                                                                                                                            |
|------------------|----|----------------------------------------------------------------------------------------------------------------------------------------------------------------------------|
| Key results      | 18 | Summarise key results with reference to study objectives                                                                                                                   |
| Limitations      | 19 | Discuss limitations of the study, taking into account sources of potential bias or imprecision. Discuss both direction and magnitude of any potential bias                 |
| Interpretation   | 20 | Give a cautious overall interpretation of results considering objectives, limitations, multiplicity of analyses, results from similar studies, and other relevant evidence |
| Generalisability | 21 | Discuss the generalisability (external validity) of the study results                                                                                                      |

**Other information**

|         |    |                                                                                                                                                               |
|---------|----|---------------------------------------------------------------------------------------------------------------------------------------------------------------|
| Funding | 22 | Give the source of funding and the role of the funders for the present study and, if applicable, for the original study on which the present article is based |
|---------|----|---------------------------------------------------------------------------------------------------------------------------------------------------------------|

\*Give information separately for cases and controls in case-control studies and, if applicable, for exposed and unexposed groups in cohort and cross-sectional studies.

**Note:** An Explanation and Elaboration article discusses each checklist item and gives methodological background and published examples of transparent reporting. The STROBE checklist is best used in conjunction with this article (freely available on the Web sites of PLoS Medicine at <http://www.plosmedicine.org/>, Annals of Internal Medicine at <http://www.annals.org/>, and Epidemiology at <http://www.epidem.com/>). Information on the STROBE Initiative is available at [www.strobe-statement.org](http://www.strobe-statement.org).

# BMJ Open

## The impact of COVID-19 on acute trauma and orthopaedic referrals and surgery in the UK during the first wave of the pandemic: a multicentre observational study

|                                 |                                                                                                                                                                                                                                                                                             |
|---------------------------------|---------------------------------------------------------------------------------------------------------------------------------------------------------------------------------------------------------------------------------------------------------------------------------------------|
| Journal:                        | <i>BMJ Open</i>                                                                                                                                                                                                                                                                             |
| Manuscript ID                   | bmjopen-2021-054919.R1                                                                                                                                                                                                                                                                      |
| Article Type:                   | Original research                                                                                                                                                                                                                                                                           |
| Date Submitted by the Author:   | 12-Oct-2021                                                                                                                                                                                                                                                                                 |
| Complete List of Authors:       | Sugand, Kapil; Imperial College London, MSk Lab<br>Aframian, Arash; Imperial College London, MSk Lab<br>Park, Chang; Imperial College London, Trauma and orthopaedics<br>Sarraf, Khaled; Imperial College London, Trauma and Orthopaedics<br>Collaborative, COVERT; Imperial College London |
| <b>Primary Subject Heading</b>: | Surgery                                                                                                                                                                                                                                                                                     |
| Secondary Subject Heading:      | Emergency medicine, Epidemiology, Surgery, Medical management, Health services research                                                                                                                                                                                                     |
| Keywords:                       | COVID-19, TRAUMA MANAGEMENT, ORTHOPAEDIC & TRAUMA SURGERY, EPIDEMIOLOGY                                                                                                                                                                                                                     |
|                                 |                                                                                                                                                                                                                                                                                             |

SCHOLARONE™  
Manuscripts



I, the Submitting Author has the right to grant and does grant on behalf of all authors of the Work (as defined in the below author licence), an exclusive licence and/or a non-exclusive licence for contributions from authors who are: i) UK Crown employees; ii) where BMJ has agreed a CC-BY licence shall apply, and/or iii) in accordance with the terms applicable for US Federal Government officers or employees acting as part of their official duties; on a worldwide, perpetual, irrevocable, royalty-free basis to BMJ Publishing Group Ltd ("BMJ") its licensees and where the relevant Journal is co-owned by BMJ to the co-owners of the Journal, to publish the Work in this journal and any other BMJ products and to exploit all rights, as set out in our [licence](#).

The Submitting Author accepts and understands that any supply made under these terms is made by BMJ to the Submitting Author unless you are acting as an employee on behalf of your employer or a postgraduate student of an affiliated institution which is paying any applicable article publishing charge ("APC") for Open Access articles. Where the Submitting Author wishes to make the Work available on an Open Access basis (and intends to pay the relevant APC), the terms of reuse of such Open Access shall be governed by a Creative Commons licence – details of these licences and which [Creative Commons](#) licence will apply to this Work are set out in our licence referred to above.

Other than as permitted in any relevant BMJ Author's Self Archiving Policies, I confirm this Work has not been accepted for publication elsewhere, is not being considered for publication elsewhere and does not duplicate material already published. I confirm all authors consent to publication of this Work and authorise the granting of this licence.

1  
2  
3  
4 1 **The impact of COVID-19 on acute trauma and orthopaedic referrals and surgery in the UK**  
5  
6  
7 2 **during the first wave of the pandemic: a multicentre observational study**  
8  
9

10 3  
11  
12  
13 4 **The COVID-Emergency Related Trauma and orthopaedics (COVERT) Collaborative**  
14  
15  
16  
17 5

18  
19  
20 6 Kapil Sugand, Arash Aframian, Chang Park, Khaled M Sarraf, COVERT Collaborative  
21  
22

23 7  
24  
25  
26  
27 8 Department of Trauma and Orthopaedics, Imperial College Healthcare NHS Trust, London,  
28

29  
30 9 UK  
31  
32

33  
34 10  
35  
36  
37 11 *Corresponding author:*  
38

39  
40 12 Kapil Sugand  
41

42  
43  
44 13 Dept T&O, St Mary's Hospital, Praed St, London, W2 1NY  
45

46  
47 14 E: [ks704@ic.ac.uk](mailto:ks704@ic.ac.uk)  
48

49  
50 15 T: 07773642813  
51  
52

53  
54 16  
55  
56  
57 17 **Keywords:** COVID-19; orthopaedic trauma; UK multi-centre; pandemic wave; mortality  
58

59  
60 18

1  
2  
3  
4  
5  
6  
7  
8  
9  
10  
11  
12  
13  
14  
15  
16  
17  
18  
19  
20  
21  
22  
23  
24  
25  
26  
27  
28  
29  
30  
31  
32  
33  
34  
35  
36  
37  
38  
39  
40  
41  
42  
43  
44  
45  
46  
47  
48  
49  
50  
51  
52  
53  
54  
55  
56  
57  
58  
59  
60

19 **Word count: 4000 words**

For peer review only

1  
2  
3 **20 Abstract**  
4  
5  
6

7 **22 Objective:** This is the first British multi-centre study observing the impact of the COVID-19  
8  
9 **23** pandemic on orthopaedic trauma with respect to referrals, operative caseload and mortality  
10  
11 **24** during its peak.

12  
13 **25 Design:** A longitudinal, multi-centre, retrospective, observational, cohort study was  
14  
15  
16 **26** conducted during the peak 6 weeks of the first wave from March 17, 2020 compared to the  
17  
18 **27** same period in 2019.

19  
20 **28 Setting:** Hospitals from six major urban cities were recruited around the UK, including  
21  
22  
23 **29** London.

24  
25 **30 Participants:** A total of 4840 clinical encounters were initially recorded. 4668 clinical  
26  
27 **31** encounters were analysed post-exclusion.

28  
29 **32 Primary and secondary outcome measures:** Primary outcomes included the number of  
30  
31  
32 acute trauma referrals and those undergoing operative intervention, mortality rates, and the  
33  
34 **34** proportion of patients contracting COVID-19. Secondary outcomes consisted of the  
35  
36 **35** mechanism of injury, type of operative intervention and proportion of aerosolising-generating  
37  
38 **36** anaesthesia utilised.

39  
40 **37 Results:** During the COVID-19 period there was a 34% reduction in acute orthopaedic  
41  
42  
43 **38** trauma referrals compared to 2019 (1792 down to 1183 referrals), and 29.5% less surgical  
44  
45  
46 **39** interventions (993 down to 700 operations). The mortality rate significantly (both statistically  
47  
48 **40** and clinically) more than doubled for both risk and odds ratios during the COVID period in  
49  
50 **41** all referrals (1.3% vs 3.8%,  $p=0.0005$ ) and in those undergoing operative intervention (2.2%  
51  
52 **42** vs 4.9%,  $p=0.004$ ). Moreover, mortality due to COVID-related complications (versus non-  
53  
54 **43** COVID causes) had greater odds by a factor of at least 20 times. For the operative cohort  
55  
56 **44** during COVID, there was a greater odds of aerosolising-generating anaesthesia (including  
57  
58  
59  
60

1  
2  
3 45 those with superimposed regional blocks) by three-quarters as well as doubled odds of a  
4  
5 46 Consultant acting as the primary surgeon.  
6  
7  
8 47

9  
10 48 **Conclusion:** Although there was a reduction of acute trauma referrals and those undergoing  
11  
12 49 operative intervention, the mortality rate still more than doubled in odds during the peak of  
13  
14 50 the pandemic compared to the same time interval one year ago.  
15  
16

17 51  
18  
19 52 **Keywords:** COVID-19; orthopaedic trauma; UK multi-centre; pandemic wave; mortality  
20  
21 53

22  
23  
24 54 **Article summary: Strengths and limitations of this study**  
25

- 26  
27 55
- 28 • This was the first representative observational study of the UK looking into the  
29  
30  
31 56 impact of COVID-19 pandemic on general trauma and orthopaedic surgical specialty.  
32  
33
  - 34 57 • There is a valid comparison between two timeframes, exactly one year apart to  
35  
36  
37 58 represent pre-COVID and during COVID.  
38  
39
  - 40  
41 59 • Other studies thus far have only shed light on local scales or cross-speciality within a  
42  
43  
44 60 shorter timeframe than this study and not necessarily commenting on mortality rates  
45  
46  
47 61 like this study.  
48  
49
  - 50  
51 62 • Weaknesses included loss of data points which have been accounted for in the tables  
52  
53  
54 63 (i.e. labelled as unknown) which did not affect the final analysis of data points.  
55  
56  
57  
58  
59  
60



- 1  
2  
3  
4 64 • Operations conducted outside the specific study periods will not account for all those  
5  
6  
7 65 operations required such as for hip fractures.  
8  
9  
10  
11  
12  
13  
14  
15  
16  
17  
18  
19  
20  
21  
22  
23  
24  
25  
26  
27  
28  
29  
30  
31  
32  
33  
34  
35  
36  
37  
38  
39  
40  
41  
42  
43  
44  
45  
46  
47  
48  
49  
50  
51  
52  
53  
54  
55  
56  
57  
58  
59  
60

For peer review only

## 66 **Introduction**

### 68 *The Global Impact of COVID-19*

69 The COVID-19 pandemic will be remembered as one of the most unprecedented global  
70 health crises in modern history. With over 4.5 million deaths and over 224 million recorded  
71 cases globally, the pandemic has had a permanent impact on healthcare at the time of article  
72 submission.<sup>1</sup> The viral outbreak was first reported in December 2019 with the first patient  
73 hospitalised in the city of Wuhan, China.<sup>2</sup> By mid-March the outbreak affected over 190  
74 countries with over 450,000 cases and over 20,000 deaths, thus being declared a pandemic  
75 and a global public health emergency by the World Health Organization.<sup>3</sup> On January 24<sup>th</sup>  
76 2020 Europe reported its first case followed by a case in the United Kingdom (UK) 5 days  
77 later.<sup>4</sup>

### 79 *The British Response to the pandemic*

80 The English government responded by implementing social distancing measures on the 17<sup>th</sup>  
81 March 2020 in an attempt to reduce the rate of transmission and therefore the demands on the  
82 National Health Service (NHS).<sup>5</sup> This was followed a week later by more stringent measures,  
83 commonly referred to as a societal 'lockdown'.<sup>6</sup> As of the 23<sup>rd</sup> March 2020, all members of  
84 the public were required to stay at home. The NHS has also been deeply affected by the strain  
85 imposed by the virus as the healthcare infrastructure has had to evolve to cope with the  
86 overwhelming and unexpected pressures on staff, resources and finances. There has been a  
87 complete renovation of emergency medicine and orthopaedic services to manage  
88 musculoskeletal disease and trauma. In response to the NHS emergency declaration,<sup>7</sup> the  
89 Royal Colleges of Surgeons<sup>8</sup> and the British Orthopaedic Association<sup>9</sup> both issued statements  
90 and guidelines for delivering emergency trauma and orthopaedic care during the COVID-19  
91 outbreak. The lockdown to limit the spread of the virus has had an unforeseen effect in

1  
2  
3 92 significantly reducing the acute trauma workload described in several single centre studies.<sup>10-</sup>  
4

5 93 <sup>13</sup> There has however not been a British multi-centre reflection of the impact of the COVID-  
6  
7 94 19 pandemic on the orthopaedic workload and its potential impact on the mortality.  
8  
9

10 95

11  
12  
13 96 **Aim**

14  
15 97 To observe the impact of COVID-19 on trauma and orthopaedic acute referrals, operative  
16  
17 98 casemix and mortality rates during the peak 6 weeks of the first wave of the pandemic  
18  
19 99 compared to the same time interval in 2019.  
20  
21  
22

23 100

24  
25  
26 101 **Alternative hypothesis**

27  
28 102 When comparing both years, there would be a difference in the prevalence of acute  
29  
30 103 orthopaedic referrals, orthopaedic trauma casemix and aerosol-generating anaesthetic  
31  
32 104 procedures due to social distancing/lockdown. Mortality rates and survival probabilities were  
33  
34 105 also hypothesised to differ due to the first COVID-19 outbreak.  
35  
36  
37

38 106  
39  
40  
41  
42  
43  
44  
45  
46  
47  
48  
49  
50  
51  
52  
53  
54  
55  
56  
57  
58  
59  
60

## 107 **Methods**

108 *Study design:* This is the first multi-centre longitudinal observational study observing patients  
109 who were acutely referred to the trauma and orthopaedic departments as well as those  
110 operated on within the same 6-week interval comparing 2019 to 2020.

111  
112 *Setting:* 7 principal hospitals contributed data from 6 major urban cities including London,  
113 Gateshead, Middlesbrough, Dartford, Newport, and Reading.

114  
115 *Patient sampling:* All acute referrals, operative notes, inpatient medical records and discharge  
116 summaries were accessed using electronic medical system at each contributing hospital trust.

117  
118 *Study period:* The 6-week study period was from the start of social distancing on Tuesday  
119 17<sup>th</sup> March 2020 to Tuesday 28<sup>th</sup> April 2020 which encompassed the national lockdown  
120 measures instigated on the 23<sup>rd</sup> March 2020. This period was considered the peak 6 weeks of  
121 the epidemic in the UK as outlined by the recorded mortality rates and R-values published by  
122 the Office of National Statistics.<sup>14</sup> This time period was compared to the same 6-week  
123 interval from Tuesday 19<sup>th</sup> March to Tuesday 30<sup>th</sup> April 2019 (i.e. prior to any COVID-19  
124 related measures) to compare the impact of the pandemic one year apart.

125  
126 *Outcomes/objectives:* Primary outcomes included the number of acute trauma referrals and  
127 those undergoing operative intervention, post-operative complications, mortality rates, and  
128 the proportion of patients contracting COVID-19. Secondary outcomes consisted of the

1  
2  
3 129 mechanism of injury, type of operative intervention and proportion of aerosolising-generating  
4  
5 130 anaesthesia utilised.

6  
7  
8 131

9  
10  
11 132 *Inclusion criteria:* All acute orthopaedic trauma referrals presenting to the Emergency  
12  
13 133 Department during the intervals one year apart were included. All orthopaedic trauma cases  
14  
15 134 that required an operation, including those from acute orthopaedic trauma referrals, within  
16  
17 135 the intervals one year apart. Those patients listed for an operation due to orthopaedic trauma  
18  
19 136 prior to time period of data collection were included in the final analysis. We adhered to  
20  
21 137 STROBE guidelines for observational studies.

22  
23  
24  
25 138

26  
27  
28 139 *Exclusion criteria:* Any cases being referred internally from other specialties for trauma and  
29  
30 140 orthopaedic advice and input, as well as referrals from any external centre asking for tertiary  
31  
32 141 advice were excluded from further analysis. Any patients with post-operative complications  
33  
34 142 arising from the period prior to the data collection were excluded. For operative trauma cases,  
35  
36 143 those undergoing spinal procedures were excluded as these are jointly treated by  
37  
38 144 Neurosurgery in most hospitals. All non-urgent semi-elective procedures were excluded from  
39  
40 145 analysis as well, as they would inaccurately assess the impact of any social distancing  
41  
42 146 measures on the trauma workload. Routine elective orthopaedic cases were excluded.

43  
44  
45  
46  
47 147

48  
49 148 *Data points:* Demographics including age, sex and ASA grades were recorded for all  
50  
51 149 patients. Injury characteristics were recorded, including the anatomical location and if the  
52  
53 150 injury was open or closed. The mechanism of injury was categorised and whether the patient  
54  
55 151 was referred as a trauma call. The nature of the operative procedures and the anaesthetic  
56  
57 152 techniques were recorded. Patients undergoing multiple procedures were recorded for every  
58  
59  
60

153 episode where they were taken to theatre. 6-week mortality rate was recorded as well as the  
 154 COVID-19 status of any symptomatic patients or suspected cases. Data points were divided  
 155 into acute referrals and operative casemix as seen in table 1.

156

157 *Table 1: data points for acute referrals and operative casemix*

|                     |                                        |                                                |                               |
|---------------------|----------------------------------------|------------------------------------------------|-------------------------------|
| Age (years)         | Gender (Male / female by birth)        | ASA (1-5)                                      | Date of injury / presentation |
| Injury              | Mechanism of injury                    | Open Vs Closed fracture                        | Trauma Call (Yes / No)        |
| Operative procedure | Anaesthetic Technique (AGP vs non-AGP) | Seniority of Surgeon (Consultants vs trainees) | Comorbidities                 |
| Six-week mortality  | Post-op complications                  | Surgery time since admission (hours)           | COVID status (from PCR swabs) |

158

- 159 • *Anaesthetic techniques:* This was divided into anaesthetic aerosolising-generating  
 160 procedures (AGP) which consisted of any intubation (including laryngeal mask  
 161 airway and endotracheal intubation) for a general anaesthetic. All other anaesthetic  
 162 techniques including regional and local anaesthetics were deemed as non-AGPs.
- 163 • *COVID status:* At the time, COVID was being diagnosed with polymerase chain  
 164 reaction (PCR) from nasal and oropharyngeal swabs with a duration of 1 to 4 days  
 165 where the sample was tested both locally in the hospital lab as well as corroborated  
 166 with national lab testing to reduce risk of unequivocacy. Groups of patients were  
 167 divided into either not swabbed (due to being asymptomatic) or swabbed due to  
 168 presence of documented symptoms which yielded either negative or positive results.

1  
2  
3 169  
4  
5

6 170 *Statistical analysis:* All the data were recorded, anonymised and verified by four members of  
7  
8 171 the study group for their accuracy. The data were processed using Microsoft Excel  
9  
10 172 (Microsoft, Washington, USA). Shapiro-Wilk test indicated a normal distribution for age and  
11  
12 173 days to discharge from hospital; hence, the mean ( $\pm$  standard deviation; 95% CI) were  
13  
14 174 calculated for both. ASA did not follow normality and was analysed using median ( $\pm$ median  
15  
16 175 absolute deviation [MAD]) and interquartile range (IQR). Both prevalence or risk and odds  
17  
18 176 ratios were calculated as well as a Fisher's exact test for statistical significance for  
19  
20 177 categorical data, defined as  $p \leq 0.05$ . Percentages and confidence intervals were rounded off  
21  
22 178 to one decimal place.  
23  
24  
25  
26

27 179  
28

29 180 *The collaborative:* The COVID Emergency Related Trauma and orthopaedics (COVERT)  
30  
31 181 Collaborative was founded at Imperial College Healthcare NHS Trust. It is currently a  
32  
33 182 member of the COVID Research Group and it has been endorsed by the Royal College of  
34  
35 183 Surgeons of England and Imperial College Healthcare NHS Trust.  
36  
37  
38

39 184  
40

41 185 *Patient and Public Involvement:* Patients and the public were not involved in the study  
42  
43 186 design, recruitment or conduct.  
44  
45  
46  
47  
48  
49  
50  
51  
52  
53  
54  
55  
56  
57  
58  
59  
60

## 187 Results

188 A total of 4840 clinical encounters took place between the study periods. A total of 172  
 189 spinal operations and presentations were excluded from the final analysis. Table 2 outlined  
 190 demographic data. During the COVID-19 period there was a 34% reduction in acute  
 191 orthopaedic trauma referrals compared to 2019 (1792 down to 1183 referrals), and 29.5% less  
 192 surgical interventions (993 down to 700 operations). Figures 1-3 have categorised these  
 193 clinical encounters into acute referrals and operative cases between both years respectively.

194  
 195 *Table 2: Demographic data of pre- and post-COVID*

|                        |                                   | Pre-COVID (2019)             |       | COVID (2020)                 |       |
|------------------------|-----------------------------------|------------------------------|-------|------------------------------|-------|
|                        | <b>Total</b>                      | <b>1792</b>                  |       | <b>1183</b>                  |       |
| <b>Acute referrals</b> | <i>Male</i>                       | 935                          | 52.2% | 560                          | 47.3% |
|                        | <i>Female</i>                     | 857                          | 47.8% | 623                          | 52.7% |
|                        | <i>Mean Age ± SD<br/>(95% CI)</i> | 52.2 ± 27.9<br>(50.9 - 53.5) |       | 55.8 ± 27.9<br>(54.3 - 57.4) |       |
|                        | <b>Total</b>                      | <b>993</b>                   |       | <b>700</b>                   |       |
| <b>Operative cases</b> | <i>Male</i>                       | 499                          | 50.3% | 320                          | 45.7% |
|                        | <i>Female</i>                     | 494                          | 49.7% | 380                          | 54.3% |
|                        | <i>Mean Age ± SD<br/>(95% CI)</i> | 51.7 ± 28.1<br>(50 - 53.5)   |       | 57.7 ± 26.7<br>(55.7 - 59.6) |       |
|                        | <i>Median ASA ± MAD<br/>(IQR)</i> | 2 ± 1<br>(2)                 |       | 2 ± 1<br>(2)                 |       |

196

197 *Figure 1: Types and mechanisms of injuries for acute referrals*

198 *Figure 2: Types and mechanisms of injuries for operative cases*

199 *Figure 3: operative and anaesthetic techniques compared between pre- and post-COVID*

200



201 **COVID status**

202 COVID status for overall patient groups including positive results in the mortalities in acute  
 203 referrals and operative casemix were demonstrated in figure 4. Overall mortalities with  
 204 positive swab results were confirmed prior to the event of death.

205

206 *Figure 4: COVID status for acute referrals and operative cases as a measure of proportions*

207

208 **Risk (or prevalence) and odds ratios**

209 *Table 3: Risk (or prevalence) and odds ratios for acute referrals and operative caseloads.*

210 *Comparisons are made between COVID period against the pre-COVID period. Value >1*

211 *indicated greater odds or risk during the COVID period.*

|                                          |                                                                  | Acute referrals |      |         | Operative caseload |      |         |
|------------------------------------------|------------------------------------------------------------------|-----------------|------|---------|--------------------|------|---------|
|                                          |                                                                  | RR              | OR   | p-value | RR                 | OR   | p-value |
| <b>Morbidity<br/>&amp;<br/>Mortality</b> | Mortality                                                        | 2.50            | 2.55 | 0.0005  | 2.19               | 2.25 | 0.004   |
|                                          | Mortality due to COVID-related complications vs non-COVID causes | 14.2            | 19.7 | 0.004   | 15.1               | 22.0 | 0.004   |
|                                          | Peri-/post-operative complications including COVID               |                 |      |         | 5.88               | 6.09 | 0.00001 |
|                                          | Peri-/post-operative complications excluding COVID               |                 |      |         | 3.65               | 3.72 | 0.003   |
|                                          | Peri-/post-operative COVID positive testing                      |                 |      |         | 32.6               | 23.4 | 0.0009  |
|                                          |                                                                  |                 |      |         |                    |      |         |

|                               |                                    |      |      |         |      |      |         |
|-------------------------------|------------------------------------|------|------|---------|------|------|---------|
| <b>Anaesthetic technique</b>  | General anaesthetic only           |      |      |         | 1.22 | 1.61 | 0.00001 |
|                               | General anaesthetic ± block        |      |      |         | 1.23 | 1.75 | 0.00001 |
| <b>Consultant involvement</b> | Consultant-led operation           |      |      |         | 1.36 | 2.08 | 0.00001 |
| <b>Operation technique</b>    | Open reduction + internal fixation |      |      |         | 0.81 | 0.74 | 0.007   |
|                               | Dynamic hip screw                  |      |      |         | 2.02 | 2.11 | 0.00001 |
|                               | Removal of metal/foreign body      |      |      |         | 0.24 | 0.23 | 0.003   |
| <b>Mechanism of injury</b>    | Road traffic accident              | 0.58 | 0.56 | 0.001   | 0.45 | 0.43 | 0.00001 |
|                               | Fall (<1.5m)                       | 1.19 | 1.54 | 0.00001 | 1.17 | 1.49 | 0.0001  |
|                               | Sporting injury                    | 0.63 | 0.60 | 0.0005  | 0.64 | 0.61 | 0.003   |
|                               | Infection                          | 0.69 | 0.66 | 0.001   | 1.70 | 1.77 | 0.005   |
|                               | Trauma call                        |      |      |         | 0.55 | 0.52 | 0.0005  |
| <b>Type of injury</b>         | Neck of femur (NOF) fracture       | 1.44 | 1.57 | 0.00001 | 1.51 | 1.79 | 0.00001 |
|                               | Lower limb (excl. NOF)             | 0.89 | 0.84 | 0.04    | 0.74 | 0.65 | 0.0001  |
| <b>Gender</b>                 | Male                               | 0.91 | 0.82 | 0.01    |      |      |         |

212

213 Table 3 outlined the risk [RR] (or prevalence [PR]) and odds ratios [OR] alongside their 95%  
 214 confidence intervals and statistical significance. The risk ratio is synonymous with the  
 215 prevalence ratio. Only those factors that were statistically significant within the acute  
 216 referrals and operative caseloads were included.

217

## 218 Morbidity and Mortality

219 Table 3 indicated that the mortality rate more than doubled significantly for both risk  
 220 (RR=2.19-2.50) and odds (OR=2.25-2.55) ratios during the COVID period. This certainly has  
 221 both statistical as well as clinical significance. COVID-related complications were still  
 222 responsible for increasing the odds of mortality by 20 to 22 times within all mortalities from  
 223 both acute referrals and operative cases (as compared to non-COVID causes for all mortality  
 224 in the year 2019). Table 4 confirmed that the mean age of mortalities across the board were in  
 225 the elderly patient population with a high median ASA grade. Males were consistently in the  
 226 minority, while neck of femur fracture was the modal diagnosis due to falls and persistently  
 227 in the majority, followed by lower limb injuries (figures 5-6).

228 At least 82% of operations were related to neck of femur fractures in which half of all  
 229 operations during the COVID period involved anaesthetic AGPs. Whereas the mortalities  
 230 from pre-COVID operations did not have Consultant-led (as primary surgeon) surgery, that  
 231 increased to three-fifths of all operations conducted during the COVID period (figure 7). The  
 232 mean date of presentation to hospital was one week ahead in year 2020 compared to a year  
 233 ago but the time from admission to mortality differed only by a mean of less than a day in  
 234 both categories.

235  
 236 *Table 4: Patient demographics, date of injuries, and time to mortality*

|                                                 | <i>Acute referrals</i>       |                                          | <i>Operative casemix</i>     |                                          |
|-------------------------------------------------|------------------------------|------------------------------------------|------------------------------|------------------------------------------|
|                                                 | <b>2019</b><br><b>(n=23)</b> | <b>2020</b><br><b>(n=38)</b>             | <b>2019</b><br><b>(n=22)</b> | <b>2020</b><br><b>(n=34)</b>             |
| <b>Mortality</b>                                | 1.3%                         | 3.2%                                     | 2.2%                         | 4.9%                                     |
| <b>Mortality with COVID positive PCR result</b> |                              | 0.9% (total)<br>28.0% (mortality cohort) |                              | 1.6% (total)<br>32.9% (mortality cohort) |
| <b>Post-op morbidity</b>                        |                              |                                          | 0.7%                         | 4.1%                                     |

|                                                              |                              |                           |                             |                              |
|--------------------------------------------------------------|------------------------------|---------------------------|-----------------------------|------------------------------|
| Age (years;<br>mean±SD; 95% CI)                              | 80.2 ± 16.4<br>(73.2 - 87.2) | 77 ± 23<br>(67 - 88)      | 83.9±12.2<br>(78.7 - 89.1)  | 84.0±13.5<br>(79.4 - 88.5)   |
| Male                                                         | 9   39%                      | 16   42%                  | 8   36%                     | 15   44%                     |
| ASA (median±MAD;<br>IQR)                                     |                              |                           | 3 ± 0<br>(1)                | 3 ± 0<br>(0)                 |
| Date of injury (mean<br>days±SD; 95%CI)                      | 6/4 ± 11<br>(1/4 - 10/4)     | 31/3 ± 12<br>(26/3 - 5/4) | 6/4 ± 12<br>(1/4 - 11/4)    | 30/3 ± 14<br>(25/3 - 4/4)    |
| Time from admission<br>to mortality (mean<br>days±SD; 95%CI) | 10.3 ± 7.5<br>(7.1 - 13.5)   | 11 ± 10<br>(7 - 15)       | 14.3 ± 10.4<br>(9.8 - 18.7) | 13.8 ± 10.4<br>(10.2 - 17.3) |

237

238 *Figure 5: types and mechanism of injury for mortalities in acute referral cohorts*

239 *Figure 6: types and mechanism of injury for mortalities in operative casemix cohorts*

240 *Figure 7: Surgical and anaesthetic techniques utilised in mortalities as a means of proportions*

241

242 Taking into account that COVID was a peri-operative complication since patients may have  
 243 been symptomatic with COVID manifestations pre-operatively but only had the swab results  
 244 return with a positive finding either pre- or post-operatively; the commonest post-operative  
 245 complication in the COVID period was a hospital-acquired pneumonia but with negative  
 246 COVID swab results or the decision not to test at all. The second most common post-  
 247 operative complication in the year 2020 was extra-pulmonary sepsis (figure 8). The  
 248 proportion of post-operative complications had significantly increased when including or  
 249 excluding COVID as a peri- or post-operative complication in 2020 (0.70% vs. 2.57-4.14%;  
 250 p=0.003) with varying odds (3.72-23.4) and risk (3.65-32.6) ratios (table 3).

251

1  
2  
3 252 *Figure 8: Post-operative complications for both years*

4  
5  
6 253

7  
8 254 Figures 9-10 focused on the total number and nature of comorbidities within the mortality  
9  
10 255 groups. Multiple contingency chi-square test was insignificant for both number of  
11  
12 256 comorbidities and individual comorbidities between both years, except for cardiovascular and  
13  
14 257 cerebrovascular disease in acute referrals.  
15  
16

17 258

18  
19  
20 259 *Figure 9: Type of comorbidities for all mortalities in both years*

21  
22  
23 260 *Figure 10: number of comorbidities for all mortalities in both years*

24  
25 261

26  
27 262 **Survival probability**

28  
29  
30 263 A six-week Kaplan-Meier survival probability analysis for mortalities between both years  
31  
32 264 was plotted in figures 11-12.  
33  
34

35 265

36  
37  
38 266 *Figure 11: Six-week Kaplan-Meier survival probability analysis for mortalities between pre-*  
39  
40 267 *and post-COVID for acutely referred from the Emergency Department*

41  
42  
43 268 *Figure 12: Six-week Kaplan-Meier survival probability analysis for mortalities between pre-*  
44  
45 269 *and post-COVID for those undergoing surgery*  
46  
47

48  
49 270  
50  
51  
52  
53  
54  
55  
56  
57  
58  
59  
60

## 271 **Discussion**

### 272 *Comment on alternative hypothesis*

273 There was a significant difference between pre- and post-COVID periods at its peak. The  
274 alternative hypothesis was not rejected with respect to prevalence of (i) acute orthopaedic  
275 trauma referrals (reduced by 34%), (ii) surgical interventions (reduced by 29.5%), (iii)  
276 anaesthetic aerosolising-generating procedures, (iv) mortality rates (more than doubled in the  
277 COVID period), and (v) survival probability between pre- and post-COVID eras.

278

### 279 *Corroboration of our results with current literature*

280 The 34% reduction in acute trauma referrals is in keeping with previous single centre studies  
281 performed in the UK with results ranging between 26-59%.<sup>10-13,15,16</sup> As described in these  
282 previous studies we would attribute the overall reduction of trauma workload to be due to  
283 reduction in travel and outdoor activities during the national lockdown. MacDonald *et al.*<sup>17</sup>  
284 described a similar effect in their multi-centre study with a reduction of operative workload  
285 by 26.5% compared to 29.5% in our study. Sites recruited for this study confirmed that they  
286 continued to operate at their own facilities during the data collection period whereas some  
287 later used alternative and external facilities including private hospitals through NHS England  
288 pathways (as mentioned by Dayananda *et al.*<sup>18</sup>), which may have impacted nosocomial rates  
289 of COVID, morbidity and mortality. However, this would be difficult to assess since it would  
290 also depend on the diversions of the ambulance services to ‘clean’ versus ‘contaminated’  
291 hospital sites.

292

### 293 *Changes in trends during COVID*

1  
2  
3 294 With respect to the acute referrals, patients had half (OR=0.52) the odds of presenting as a  
4  
5 295 trauma call. This was due to the odds ratios of road traffic accidents, sporting injuries,  
6  
7 296 infection, and lower limb injuries were significantly less (by 34-44%; OR=0.56-0.66) during  
8  
9 297 the COVID period. Conversely, there was a significant rise in the odds of neck of femur  
10  
11 298 fractures, falls, the use of anaesthetic AGP and Consultant-led operations; a finding also  
12  
13 299 reflected by Arafa *et al.*<sup>19</sup>  
14  
15  
16

17 300 Although the expectation was to minimise the use of aerosolising-generating anaesthetic  
18  
19 301 procedures, there was in fact an increased prevalence of using general anaesthesia ± block up  
20  
21 302 to an odds of 75%, in order to create a ‘closed circuit’ for the airways. As the anaesthetic  
22  
23 303 methods was not well documented in the pre-COVID era in a fifth (21.3%) of cases, this  
24  
25 304 skewed the data as it may have been difficult to extract that data from last year. The odds of a  
26  
27 305 Consultant-led operation doubled (OR=2.08) during the COVID period as a consequence of  
28  
29 306 all elective operations being suspended, more Consultants being relocated to trauma theatre  
30  
31 307 and increased pressure within the theatre environments leading to Consultant-delivered,  
32  
33 308 rather than Consultant-led care. With respect to surgical procedures, there was a significant  
34  
35 309 reduction in prevalence ratio of open reduction and internal fixation by a fifth (PR=0.81) and  
36  
37 310 removal of metalwork and foreign bodies by three-quarters (PR=0.24), while there was a  
38  
39 311 doubling (PR=2.02) in dynamic hip screw fixation in the COVID era.  
40  
41  
42  
43  
44  
45  
46  
47

### 313 ***Morbidity and Mortality rates***

#### 314 *Mortality during COVID-19 timeframe*

315 Overall 6-week mortality rates significantly doubled for both prevalence (or risk) and odds  
316 ratios during the COVID-19 period (table 3). For mortalities within all acute referrals, 0.9%  
317 (figure 4) of the entire cohort and 28.9% of those mortalities tested positive for COVID. For  
58  
59  
60

1  
2  
3 318 mortalities within the operative casemix, 1.6% (figure 4) of the entire cohort and 32.4% of  
4  
5 319 those mortalities had a confirmed positive COVID-19 diagnosis prior to their death.  
6  
7  
8 320

9  
10 321 Comparatively, the COVIDSurg Collaborative observed a mortality rate of 28.8% ( $p < 0.0001$ )  
11  
12 322 of orthopaedic patients who underwent surgery (both elective and trauma) within the first  
13  
14 323 quarter of the year.<sup>20</sup> The increased mortality during the pandemic is partly due to selection  
15  
16 324 of cases that required surgical intervention. The decrease in acute referrals and operations  
17  
18 325 indicated a higher threshold for treatment (due to a redistribution of hospital resources during  
19  
20 326 the pandemic). However, no such case was denied surgery but in the worst-case scenario  
21  
22 327 patients were offered postponed treatment. There are many cases with less severe orthopaedic  
23  
24 328 trauma where there is a 2–3 week window of opportunity for acute operative management.  
25  
26 329 Table 2 demonstrated that the COVID cohort on average was 6.9% older for the acute  
27  
28 330 referrals and 11.6% older for the operative casemix which could be proportional to the risk of  
29  
30 331 developing age-related and involuntional morbidities and frailty.  
31  
32  
33  
34  
35  
36  
37  
38  
39

### 333 *Role of morbidity in mortality during COVID-19*

40 334 Results from figures 8-10 were corroborated by the COVIDSurg publication<sup>20</sup> which  
41  
42 335 confirmed a significant association of mortality with myocardial infarction and congestive  
43  
44 336 heart failure. However, hypertension and stroke/transient ischemic attacks were not  
45  
46 337 significantly associated. In our study, all cardiovascular diseases (including peripheral  
47  
48 338 vascular, arrhythmias, hypertension, heart failure, myocardial infarction and acute coronary  
49  
50 339 syndromes) were combined with cerebrovascular diseases (consisting of strokes and transient  
51  
52 340 ischemic attacks). Unlike their study, our study did not find a significant association with  
53  
54 341 chronic kidney disease, chronic obstructive disease (which included asthma) and dementia in  
55  
56 342 all mortalities during the 2020 timeframe regardless of the COVID status. The differences  
57  
58  
59  
60



1  
2  
3 343 may stem from that their study looked at the comparison of mortality rates within the same  
4  
5 344 cohort during the COVID era, whereas this study is sub-analysing the entire mortality cohort  
6  
7  
8 345 on its own to observe for specific associations and risks.  
9

10 346

11  
12 347 *Survival probability between both years*  
13

14  
15 348 There were similar patterns of survival probability between both cohorts (i.e. 2019 vs 2020  
16  
17 349 cumulative). However, the lowest survival probability and the shortest timeframe were  
18  
19  
20 350 observed in the confirmed COVID positive cohort as seen in figure 11. This was due to the  
21  
22 351 most vulnerable patient profile. 8 (72.7%) patients had femoral trauma, most being neck of  
23  
24 352 femur fractures, distal femur fracture and a dislocated hip hemiarthroplasty post-fracture.  
25  
26 353 Other patients presented with septic arthritis, post-operative complication and knee swelling;  
27  
28  
29 354 yet every patient also suffered from multiple comorbidities including those leading to  
30  
31 355 immunosuppression as seen in figures 11-12. Although these patients were prioritised in the  
32  
33 356 Emergency Department and recognised for their poor physiological reserve, due to the  
34  
35  
36 357 stresses of the acute and emergency services, these patients may have had to wait longer to be  
37  
38 358 treated acutely and appropriately admitted.  
39

40  
41 359

42  
43 360 Unexpectedly, there was a reversal of trends observed for the 6-week Kaplan-Meier survival  
44  
45 361 analysis once admitted and operated on in figure 12. Mortalities within the pre-COVID  
46  
47  
48 362 period had the lowest survival probability compared to the post-COVID cohort. The COVID  
49  
50 363 positive mortalities were observed to have the highest survival probability 11 days prior to  
51  
52 364 converging with those mortalities without COVID symptoms.  
53

54  
55 365

56  
57 366 During the pandemic, wards were ring-fenced to host confirmed COVID positive patients  
58  
59 367 with a heightened care of nursing, medical cover and personal protective equipment. Prior to  
60

1  
2  
3 368 the onset of a possible vaccination to counteract the virus, symptomatic management and  
4  
5 369 shielding were the mainstay treatments for COVID positive patients. None of these patients  
6  
7 370 were stepped up to the Intensive Treatment Unit due to being categorised as high-risk  
8  
9  
10 371 stratification for mortality based on age and extent of comorbidities.  
11

12 372

13  
14 373 *Justification of conducting this study*

15  
16  
17 374 As lockdown measures in the UK and globally eases and the incidence of trauma returns to  
18  
19 375 pre-lockdown trends, it is imperative that we understand the true increased risk of mortality  
20  
21 376 in the acute trauma patient during the COVID-19 era. A recent publication by Kader et al.<sup>21</sup>  
22  
23 377 has suggested that the rate of mortality from COVID-19 for elective orthopaedic patients is  
24  
25 378 low; yet this is the first British multi-centre study to quantify mortality risk for trauma  
26  
27 379 patients. Trauma procedures due to the nature of the injuries are necessary and time-critical,  
28  
29 380 and nobody can afford to postpone trauma care even during a global pandemic.<sup>22</sup>  
30  
31

32  
33 381

34  
35 382 Furthermore, the Corona Hands Collaborative<sup>23</sup> published that upper limb trauma patients  
36  
37 383 had SARS-CoV-2 complication rate of 0.18% (n=2) with 0.09% (n=1) overall mortality at  
38  
39 384 the peak of the first wave in April 2020. However, their collaborative looked into a shorter  
40  
41 385 post-operative period (30 vs 42 days) but they agreed that patients who had been hospitalised  
42  
43 386 for a prolonged period before their surgery were at increased risk of both COVID-related and  
44  
45 387 post-operative complications. Most of their patient cohort, who were both younger and fitter  
46  
47 388 than our cohorts, would be classified as the 'walking wounded' and could usually be day-case  
48  
49 389 procedures.  
50

51  
52 390

53  
54  
55 391 Although the trends in mechanisms of injury in our study were reflective of those within a  
56  
57 392 US multi-centre study, there was an opposing trend in the number medical/surgical  
58  
59  
60

1  
2  
3 393 procedures.<sup>24</sup> That could be due to their study encompassing on level 1 trauma centres with a  
4  
5 394 mean younger patient population. However, we do agree that with time and from experiential  
6  
7  
8 395 learning, hospitals improved their coping strategies with the pandemic and enhanced patient  
9  
10 396 safety by enforcing personal protection equipment, hosting dedicated theatres for COVID-  
11  
12 397 positive patients, separating sites as clean and contaminated, ringfencing COVID-positive  
13  
14 398 patients to dedicated wards, and promoting routine COVID PCR swabs for all admissions  
15  
16  
17 399 and pre-operative checklists.

18  
19 400

20  
21 401 With an overall mortality risk in 2020 doubled that of 2019, clinicians need to counsel  
22  
23 402 patients presenting with acute orthopaedic trauma of the increased risk in the COVID-19 era,  
24  
25 403 especially for those identified as increased risk stratification with multiple underlying  
26  
27 404 comorbidities, elderly and frailty. With the ongoing risk of a subsequent wave and resurgence  
28  
29 405 of COVID-19 cases on top of the inevitable winter pressures, this data is of critical  
30  
31 406 importance in the risk management, decision-making and policymaking of trauma patients  
32  
33 407 both in the UK and across the globe.

34  
35 408

#### 409 *Observations of hip fractures and mortality*

41  
42 410 Since the aetiology of neck of femur fracture are often low energy falls in the home  
43  
44 411 environment, it is not unexpected to observe a consistency of neck of femur fractures in the  
45  
46 412 elderly and the vulnerable during lockdown as seen in figures 1-2. Those with neck of femur  
47  
48 413 fractures remain at greatest risk of mortality and there have been further studies evaluating  
49  
50 414 the risk of COVID-19 on this inherently high-risk cohort.<sup>25-28</sup> COVID-19 itself has been  
51  
52 415 identified as an independent risk factor in increasing mortality in neck of femur fractures.<sup>29</sup>

53  
54 416  
55  
56  
57  
58  
59  
60

1  
2  
3 417 The increased mortality reflect the increased proportion of NOFF patients that have a higher  
4  
5 418 baseline mortality which has been echoed by the Scottish IMPACT-Restart study.<sup>28</sup> There are  
6  
7 419 several justifications such as reduced help, lack of assistance and staff shortages due to the  
8  
9 420 effect of the national lockdown which required elderly patients to be more independent,  
10  
11 421 unsupervised and at higher risk of falling. Nevertheless, it should be considered that odds of  
12  
13 422 falls may have increased due to prodromal symptoms and clinical manifestations of COVID.  
14  
15 423

16  
17  
18  
19 424 However on subgroup analysis of hip fractures that were operated on in 2020, 20.2% tested  
20  
21 425 positive for COVID, 47.3% tested negative and the remaining 32.4% were not tested due to  
22  
23 426 being asymptomatic. Furthermore, 82.3% of all mortalities in 2020 sustained a neck of femur  
24  
25 427 fracture in which only 35.7% of this cohort had a positive swab result, 21.4% with negative  
26  
27 428 swab results and the remaining 42.9% were not swabbed due to being asymptomatic. There  
28  
29 429 was no statistical difference in the odds and risk ratios between both years for mortality rate  
30  
31 430 in NOFF. The numbers have not changed much, but because of a drop off of other cases, the  
32  
33 431 percentage of NOFF markedly rose. Hence, the mortality expressed as a percentage of cases  
34  
35 432 is notably higher for all operations, and not necessarily if stripped down to hip fractures  
36  
37 433 alone.  
38  
39  
40  
41

42 434  
43  
44 435 If these 'at risk' patients were symptomatic with the virus, then aggressive pre-operative  
45  
46 436 optimisation would occur. Since 91% (n=10) of COVID positive patients had sustained a  
47  
48 437 neck of femur fracture, the National Hip Fracture Database best practice tariff of operating  
49  
50 438 within an ideal 36-hour window set by the Royal College of Physicians was suspended until  
51  
52 439 the patient was stabilised. All hip fracture patients in this cohort were operated on and had  
53  
54 440 dedicated orthogeriatric input commencing from hospital admission. Hence the early peri-  
55  
56 441 operative period and surgery encompassed within the 10-day period post-admission.  
57  
58  
59  
60

1  
2  
3 442 Moreover, neck of femur fractures are recognised as a pre-terminal illness and are known to  
4  
5 443 carry a high risk of mortality in the first month which is trebled in the first year after the  
6  
7 444 injury.<sup>30</sup>  
8  
9

10 445

#### 11 446 ***Strengths and weaknesses of the study and in relation to other studies***

12  
13  
14 447 This was the first representative observational multi-centre study of the UK looking into the  
15  
16 448 impact of COVID-19 pandemic on general trauma and orthopaedic surgical specialty. Studies  
17  
18 449 thus far have only shed light on local scales or cross-speciality.<sup>10-13,20</sup> Weaknesses included  
19  
20 450 loss of data points which have been accounted for in the tables (i.e. labelled as unknown).  
21  
22 451 However this did not affect the final analysis of data points. Operations conducted outside the  
23  
24 452 specific study periods will not account for all those operations required such as for NOFF. It  
25  
26 453 does not suggest that the number of NOFF not accounted for have been managed  
27  
28 454 conservatively (as discovered by Cherevu et al.<sup>31</sup>), since some NOFFs may breach time to  
29  
30 455 surgery due to medical reasons or being influenced by international guidelines.<sup>32</sup>  
31  
32  
33  
34

35 456

#### 36 457 ***Limitations and future research***

37  
38 458 It is vital to continue exploring the impact of the pandemic on a larger scale. Ideally, more  
39  
40 459 secondary care providers consisting of district general hospitals and major trauma centres  
41  
42 460 will submit data. The diagnosis of COVID was dependent on positive PCR swabs for this  
43  
44 461 study rather than non-specific changes seen on chest CT or plain radiographs. This does not  
45  
46 462 account for false negatives with clinical respiratory symptomatology or true positives in those  
47  
48 463 asymptomatic. Nevertheless, this issue with data has been speculated on in another national  
49  
50 464 study.<sup>23</sup> Data ought to be submitted during the peak of the pandemic as well as at various  
51  
52 465 time intervals as the lockdown measures ease resulting in more freedom of movement while  
53  
54 466 also accounting for the continued risk of subsequent waves and national lockdowns.<sup>33</sup> Further  
55  
56  
57  
58  
59  
60

1  
2  
3  
4  
5  
6  
7  
8  
9  
10  
11  
12  
13  
14  
15  
16  
17  
18  
19  
20  
21  
22  
23  
24  
25  
26  
27  
28  
29  
30  
31  
32  
33  
34  
35  
36  
37  
38  
39  
40  
41  
42  
43  
44  
45  
46  
47  
48  
49  
50  
51  
52  
53  
54  
55  
56  
57  
58  
59  
60

467 studies will also require to compare the impact of the pandemic on the speciality in the UK  
468 compared to other countries on other continents.

For peer review only

1  
2  
3 469 **Conclusion**  
4

5 470 This was the first, longest and largest British multi-centre representation of the impact of  
6  
7 471 COVID-19 pandemic on acute orthopaedic trauma referrals and mortality between mid-  
8  
9 472 March to end-April, representing the peak of the first wave during the lockdown. The  
10  
11 473 mortality rate for acute referrals, as well as those undergoing operative intervention, more  
12  
13 474 than doubled in odds when compared to the same time interval one year ago. The majority of  
14  
15 475 mortalities consisted of the elderly with neck of femur fractures and cardiovascular and/or  
16  
17 476 cerebrovascular diseases. This study will aid clinicians in counselling trauma patients of the  
18  
19 477 increased risk of mortality during the era of COVID-19 and also aid in both healthcare  
20  
21 478 infrastructure, resource allocation, decision-making and policymaking as we continue to  
22  
23 479 battle with the pandemic.  
24  
25  
26  
27  
28  
29  
30  
31  
32  
33  
34  
35  
36  
37  
38  
39  
40  
41  
42  
43  
44  
45  
46  
47  
48  
49  
50  
51  
52  
53  
54  
55  
56  
57  
58  
59  
60

1  
2  
3 480 **Research Ethics Approval - Human Participants:** This study involves human participants  
4  
5 481 but an Ethics Committee(s) or Institutional Board(s) exempted this study. All data points  
6  
7 482 were utilised for routine auditing purposes to reflect departmental activity and service  
8  
9 483 provision without altering clinical care pathways. Each centre contributing data to this study  
10  
11 484 registered their interests with local authority and the auditing or clinical governance  
12  
13 485 departments. No informed consent was required as there was no identifiable data. All data  
14  
15 486 were anonymised at the time of collection and submission. Each patient was assigned a  
16  
17 487 unique identification number which was cross-referenced with the patients' individual  
18  
19 488 hospital identification or medical record numbers. This cross-referenced list remained  
20  
21 489 internally within the hospital trust computer server handled by the contributing team from  
22  
23 490 each trust. The data was transferred and stored using the NHS.net email server which has  
24  
25 491 been approved for transfer of patient data. Data protection compliance was abided by at all  
26  
27 492 times. The lead centre was Imperial College Healthcare NHS Trust where this study was first  
28  
29 493 approved as a clinical audit prior to expanding onto a national scale. All centres gave  
30  
31 494 permission for the use of their data. This study was assessed using the UKRI/MRC/NHS  
32  
33 495 Health Research Authority Ethics Decision Tool and was considered an 'audit/not research';  
34  
35 496 and therefore it was not subject to further ethical review by the NHS Research Ethics  
36  
37 497 Committee (NHS REC).  
38  
39  
40  
41  
42  
43  
44  
45  
46

47 499 **Competing Interests:** None declared

48  
49 500 **Funding:** Nil

50  
51  
52 501  
53  
54 502 **Data sharing statement:** Underlying data, code and supporting documentation may be made  
55  
56 503 available as a redacted version to interested parties, subject to the completion of a protocol  
57  
58 504 and signing of a Data Transfer Agreement.  
59  
60



1  
2  
3  
4  
5  
6  
7  
8  
9  
10  
11  
12  
13  
14  
15  
16  
17  
18  
19  
20  
21  
22  
23  
24  
25  
26  
27  
28  
29  
30  
31  
32  
33  
34  
35  
36  
37  
38  
39  
40  
41  
42  
43  
44  
45  
46  
47  
48  
49  
50  
51  
52  
53  
54  
55  
56  
57  
58  
59  
60

505

506 **Acknowledgements:** none

For peer review only

1  
2  
3 **507 References**  
4  
5

- 6 508 1. World Health Organization (a). WHO Coronavirus Disease (COVID-19) Dashboard.  
7  
8  
9 509 Available online at <https://covid19.who.int>. Cited 2021 Sep 12.  
10  
11  
12 510 2. Wu F, Zhao S, Yu B, Chen YM, Wang W, Song ZG, et al. A new coronavirus associated  
13  
14 511 with human respiratory disease in China. *Nature*. 2020;579:265-9.  
15  
16 512 3. World Health Organization. Coronavirus disease 2019 (COVID-19): situation report, 66.  
17  
18 513 26 March 2020. [https://www.who.int/docs/default-source/coronaviruse/situation-](https://www.who.int/docs/default-source/coronaviruse/situation-reports/20200326-sitrep-66-covid-19.pdf?sfvrsn=9e5b8b48_2)  
19  
20 514 [reports/20200326-sitrep-66-covid-19.pdf?sfvrsn=9e5b8b48\\_2](https://www.who.int/docs/default-source/coronaviruse/situation-reports/20200326-sitrep-66-covid-19.pdf?sfvrsn=9e5b8b48_2). Cited 2021 Aug 30.  
21  
22  
23 515 4. Spiteri G, Fielding J, Diercke M, Campese C, Enouf V, Gaymard A, et al. First cases of  
24  
25 516 coronavirus disease 2019 (COVID-19) in the WHO European Region, 24 January to 21  
26  
27 517 February 2020. *Eurosurveillance* 2020 (25): 2000178.  
28  
29  
30 518 5. UK Government (a) (2020) Oral statement to Parliament, Controlling the spread of  
31  
32 519 COVID-19: Health Secretary's statement to Parliament. 16 Mar 2020.  
33  
34 520 [www.gov.uk/government/speeches/controlling-the-spread-of-covid-19-health-secretarys-](http://www.gov.uk/government/speeches/controlling-the-spread-of-covid-19-health-secretarys-statement-to-parliament)  
35  
36 521 [statement-to-parliament](http://www.gov.uk/government/speeches/controlling-the-spread-of-covid-19-health-secretarys-statement-to-parliament). Cited 2021 Aug 25.  
37  
38  
39 522 6. UK Government (b) (2020) Guidance: Oral statement to and away from others (social  
40  
41 523 distancing). 23 Mar 2020. [https://www.gov.uk/government/publications/full-guidance-on-](https://www.gov.uk/government/publications/full-guidance-on-staying-at-home-and-away-from-others)  
42  
43 524 [staying-at-home-and-away-from-others](https://www.gov.uk/government/publications/full-guidance-on-staying-at-home-and-away-from-others). Cited 2021 Sept 5.  
44  
45  
46 525 7. NHS England (2020a) Next steps on NHS response to COVID-19: Letter from Sir Simon  
47  
48 526 Stevens and Amanda Pritchard. 17 Mar 2020.  
49  
50 527 [www.england.nhs.uk/coronavirus/publication/next-steps-on-nhs-response-to-covid-19-](http://www.england.nhs.uk/coronavirus/publication/next-steps-on-nhs-response-to-covid-19-letter-from-simon-stevens-and-amanda-pritchard)  
51  
52 528 [letter-from-simon-stevens-and-amanda-pritchard](http://www.england.nhs.uk/coronavirus/publication/next-steps-on-nhs-response-to-covid-19-letter-from-simon-stevens-and-amanda-pritchard). Cited 2021 Aug 27.  
53  
54  
55 529 8. Royal College of Surgeons. Guidance for surgeons working during the COVID-19  
56  
57 530 pandemic from the Surgical Royal Colleges of the United Kingdom and Ireland. March  
58  
59  
60

- 1  
2  
3 531 20, 2020. [www.rcseng.ac.uk/coronavirus/joint-guidance-for-surgeons-v1](http://www.rcseng.ac.uk/coronavirus/joint-guidance-for-surgeons-v1). Cited 2021 Aug  
4  
5 532 28.  
6  
7  
8 533 9. British Orthopaedic Association. British Orthopaedic Association for Standards of  
9  
10 534 Trauma (BOAST). Management of patients with urgent orthopaedic conditions and  
11  
12 535 trauma during the coronavirus pandemic. March 24, 2020.  
13  
14 536 [www.boa.ac.uk/resources/statement-for-bo-a-members-on-trauma-and-orthopaedic-care-](http://www.boa.ac.uk/resources/statement-for-bo-a-members-on-trauma-and-orthopaedic-care-in-the-uk-during-coronavirus-pandemic.html)  
15  
16 [in-the-uk-during-coronavirus-pandemic.html](http://www.boa.ac.uk/resources/statement-for-bo-a-members-on-trauma-and-orthopaedic-care-in-the-uk-during-coronavirus-pandemic.html). Cited 2021 Aug 28.  
17  
18  
19 538 10. Park C, Sugand K, Nathwani D, Bhattacharya R, Sarraf KM. Impact of the COVID-19  
20  
21 539 pandemic on orthopaedic trauma workload in a London level 1 trauma centre: the "golden  
22  
23 540 month". Acta Orthop. 2020 Jun 23;1-6.  
24  
25  
26 541 11. Murphy T, Akehurst H, Mutimer J. Impact of the 2020 COVID-19 pandemic on the  
27  
28 542 workload of the orthopaedic service in a busy UK district general hospital. Injury  
29  
30 543 2020;S0020-1383(20)30560-X.  
31  
32  
33 544 12. Elhalawany A, Beastall J, Cousins G. The impact of the COVID-19 lockdown on  
34  
35  
36 545 orthopaedic emergency presentations in a remote and rural population, Bone Joint Open.  
37  
38 546 2020;1(10): 621-627.  
39  
40  
41  
42  
43 547 13. Karia M, Gupta V, Zahra W, et al. The effect of COVID-19 on the trauma burden, theatre  
44  
45  
46 548 efficiency and training opportunities in a district general hospital: planning for a future  
47  
48  
49 549 outbreak, Bone Joint Open. 2020;1-8:494–499.  
50  
51  
52  
53 550 14. Office of National Statistics. Deaths registered weekly in England and Wales,  
54  
55 551 provisional: 27 Aug, 2021. Released 7 Sept, 2021.  
56  
57 552 [www.ons.gov.uk/peoplepopulationandcommunity/birthsdeathsandmarriages/deaths/bullet](http://www.ons.gov.uk/peoplepopulationandcommunity/birthsdeathsandmarriages/deaths/bullet)  
58  
59  
60

- 1  
2  
3  
4 553 <https://www.gov.uk/government/statistics/deaths-registered-weekly-in-england-and-wales-provisional-27-august-2021>. Cited 2021 Sep  
5  
6  
7 554 12.  
8  
9  
10 555 15. Atia F, Pocnetz S, Selby A, et al. The effect of the COVID-19 lockdown on hand trauma  
11  
12  
13 556 surgery utilization. *Bone Jt Open*. 2020;1(10):639-643.  
14  
15  
16 557 16. Esteban PL, Querolt Coll J, Xicola Martínez M, et al. Has COVID-19 affected the  
17  
18  
19 558 number and severity of visits to a traumatology emergency department? *Bone Jt Open*.  
20  
21  
22 559 2020;1(10):617-620.  
23  
24  
25 560 17. MacDonald DRW, Neilly DW, Davies PSE, et al; SCORE authors. Effects of the  
26  
27  
28 561 COVID-19 lockdown on orthopaedic trauma: a multicentre study across Scotland. *Bone*  
29  
30  
31 562 *Jt Open*. 2020;1(9):541-548.  
32  
33  
34 563 18. Dayananda KSS, Mercer ST, Agarwal R, et al. A comparative review of 1,004  
35  
36  
37 564 orthopaedic trauma patients before and during the COVID-19 pandemic. *Bone Jt Open*.  
38  
39  
40 565 2020;1(8):568-575.  
41  
42  
43 566 19. Arafa M, Nesar S, Abu-Jabeh H, et al. COVID-19 pandemic and hip fractures: impact  
44  
45  
46 567 and lessons learned, *Bone Joint Open*. 2020;1-9:530–540.  
47  
48  
49 568 20. COVIDSurg Collaborative. Mortality and pulmonary complications in patients  
50  
51  
52 569 undergoing surgery with perioperative SARS-CoV-2 infection: an international cohort  
53  
54  
55 570 study. *Lancet*. 2020 May 29.  
56  
57  
58 571 21. Kader N, Clement ND, Patel VR, Caplan N, Banaszkiwicz P, Kader D. The theoretical  
59  
60 572 mortality risk of an asymptomatic patient with a negative SARS-CoV-2 test developing  
573 COVID-19 following elective orthopaedic surgery. *Bone Joint J*. 2020;1-5.

- 1  
2  
3  
4 574 22. Service BC, Collins AP, Crespo A, Couto P, Gupta S, Avilucea F, et al. Medically  
5  
6  
7 575 necessary orthopaedic surgery during the COVID-19 pandemic: safe surgical practices  
8  
9  
10 576 and a classification to guide treatment. *JBJS*. 2020;102(14):e76.  
11  
12  
13 577 23. Dean BJF; Corona Hands Collaborative. Mortality and pulmonary complications in  
14  
15  
16  
17 578 patients undergoing upper extremity surgery at the peak of the SARS-CoV-2 pandemic in  
18  
19  
20 579 the UK: a national cohort study. *BMJ Qual Saf*. 2020:bmjqs-2020-012156.  
21  
22  
23 580 24. Salottolo K, Caiafa R, Mueller J, et al. Multicenter study of US trauma centres examining  
24  
25  
26  
27 581 the effect of the COVID-19 pandemic on injury causes, diagnoses and procedures.  
28  
29  
30 582 *Trauma Surgery & Acute Care Open*. 2021;6:e000655.  
31  
32  
33 583 25. Kayani B, Onochie E, Patil V, Begum F, Cuthbert R, Ferguson D, et al. The effects of  
34  
35  
36 584 COVID-19 on perioperative morbidity and mortality in patients with hip fractures. *Bone*  
37  
38 585 *Joint J*. 2020;1-10.  
39  
40 586 26. Hall AJ, Clement ND, Farrow L, IMPACT-Scot Study Group, MacLulich AMJ, Dall  
41  
42 587 GF, et al. IMPACT-Scot report on COVID-19 and hip fractures. *Bone Joint J*. 2020;1-10.  
43  
44  
45 588 27. Clement ND, Hall AJ, Makaram NS, et al. IMPACT-Restart: the influence of COVID-19  
46  
47  
48 589 on postoperative mortality and risk factors associated with SARS-CoV-2 infection after  
49  
50  
51  
52 590 orthopaedic and trauma surgery. *Bone Joint J*. 2020;102-B(12):1774-1781.  
53  
54  
55  
56  
57  
58  
59  
60

- 1  
2  
3  
4 591 28. Mackay N, Wilding C, Langley C, et al. The impact of COVID-19 on trauma and  
5  
6  
7 592 orthopaedic patients requiring surgery during the peak of the pandemic. *Bone Jt Open*.  
8  
9  
10 593 2020;1-9:520–529.  
11  
12  
13 594 29. Narang A, Chan G, Aframian A, et al. Thirty-day mortality following surgical  
14  
15  
16 595 management of hip fractures during the COVID-19 pandemic: findings from a  
17  
18  
19 596 prospective multi-centre UK study. *Int Orthop*. 2021;45(1):23-31.  
20  
21  
22  
23 597 30. British Orthopaedic Association. British Orthopaedic Association Standards for Trauma.  
24  
25  
26 598 January 2012. BOAST 1 Version 2 - Patients sustaining a Fragility Hip Fracture.  
27  
28  
29 599 [www.boa.ac.uk/uploads/assets/6750e0bf-4aa3-4680-](http://www.boa.ac.uk/uploads/assets/6750e0bf-4aa3-4680-b1612265704512db/patients%20sustaining%20a%20fragility%20hip%20fracture.pdf)  
30  
31  
32 600 [b1612265704512db/patients%20sustaining%20a%20fragility%20hip%20fracture.pdf](http://www.boa.ac.uk/uploads/assets/6750e0bf-4aa3-4680-b1612265704512db/patients%20sustaining%20a%20fragility%20hip%20fracture.pdf).  
33  
34 601 Cited 2021 Aug 25.  
35  
36  
37 602 31. Cheruvu MS, Bhachu DS, Mulrain J, et al. Effect of COVID-19 on a rural orthopaedic  
38  
39  
40 603 hip fracture service. *Bone Jt Open*. 2020;1(8):500-507.  
41  
42  
43  
44 604 32. Lewis PM, Waddell JP. When is the ideal time to operate on a patient with a fracture of  
45  
46  
47 605 the hip? : a review of the available literature. *Bone Joint J*. 2016;98-B(12):1573-1581.  
48  
49  
50  
51 606 33. Adebowale V, Alderson D, Burn W, Dickson J, Godlee F, Goddard A, et al. Covid-19:  
52  
53  
54 607 Call for a rapid forward looking review of the UK's preparedness for a second wave-an  
55  
56  
57 608 open letter to the leaders of all UK political parties [published correction appears in *BMJ*.  
58  
59  
60

1  
2  
3  
4 609 2020 Jul 16;370:m2866. Dixon, Jeanette [corrected to Dickson, Jeanette]]. *BMJ*.

5  
6  
7 610 2020;369:m2514. Published 2020 Jun 23.

8  
9  
10 611

11  
12  
13  
14  
15  
16  
17  
18  
19  
20  
21  
22  
23  
24  
25  
26  
27  
28  
29  
30  
31  
32  
33  
34  
35  
36  
37  
38  
39  
40  
41  
42  
43  
44  
45  
46  
47  
48  
49  
50  
51  
52  
53  
54  
55  
56  
57  
58  
59  
60

For peer review only

1  
2  
3  
4 612 **Contributorship statement according to the ICMJE guidelines**

5  
6  
7 613 We have read the ICJME guidelines attentively and have outlined the collaborative  
8  
9  
10 614 contributors below who have all satisfied the criteria to be recognised as a collaborative co-  
11  
12  
13 615 author if this study is published. The core committee of the collaborative consists of KS, AA,  
14  
15  
16 616 CP and KMS who all conceptualised the study, led the  
17  
18  
19 617 planning/investigation/methodology/design, supervised the collaborative contributors' roles,  
20  
21  
22 618 as well as the initial and final version of the manuscript. Additionally, KS (primary author)  
23  
24  
25 619 was also leading data curation, project administration and resource allocation with KMS. KS  
26  
27  
28 620 was also leading on validation. KS, CP and AA led the data analysis and the reporting of the  
29  
30  
31 621 results. All other collaborative members, from the seven centres and outside the core  
32  
33  
34 622 committee, were involved in data curation, formal analysis and in resource allocation  
35  
36  
37 623 internally under consultant supervision (i.e. those with FRCS). Individual contributions from  
38  
39  
40 624 the core committee and every collaborative member has been outlined below:  
41  
42  
43  
44  
45  
46  
47  
48  
49

50 626 **COVERT Collaborative members, their affiliations and extent of contribution**

51  
52  
53 627 **Core Committee**

54 628

| Name | Qualifi-<br>cation | Contribution | E-mail |
|------|--------------------|--------------|--------|
|------|--------------------|--------------|--------|

55  
56  
57  
58  
59  
60



- 1  
2  
3  
4  
5  
6  
7  
8  
9  
10  
11  
12  
13  
14  
15  
16  
17  
18  
19  
20  
21  
22  
23  
24  
25  
26  
27  
28  
29  
30  
31  
32  
33  
34  
35  
36  
37  
38  
39  
40  
41  
42  
43  
44  
45  
46  
47  
48  
49  
50  
51  
52  
53  
54  
55  
56  
57  
58  
59  
60
- |   |                                                                                                                                                                                                                                                                          |      |                                                                                                                                                                                                                                                                                                                                                                                                                                       |                                                                                      |
|---|--------------------------------------------------------------------------------------------------------------------------------------------------------------------------------------------------------------------------------------------------------------------------|------|---------------------------------------------------------------------------------------------------------------------------------------------------------------------------------------------------------------------------------------------------------------------------------------------------------------------------------------------------------------------------------------------------------------------------------------|--------------------------------------------------------------------------------------|
| 1 | <b>Kapil Sugand</b>                                                                                                                                                                                                                                                      | MRCS | <ul style="list-style-type: none"> <li>• Conceptualisation</li> <li>• Data curation</li> <li>• Formal analysis</li> <li>• Investigation</li> <li>• Methodology/Design</li> <li>• Planning</li> <li>• Project administration</li> <li>• Resources</li> <li>• Supervise</li> <li>• Validation</li> <li>• Data analysis</li> <li>• Visualisation</li> <li>• Writing original draft</li> <li>• Writing – reviewing and editing</li> </ul> | <a href="mailto:Ks704@ic.ac.uk">Ks704@ic.ac.uk</a><br><br>ORCID: 0000-0003-3185-954X |
|   | Primary &<br>corresponding<br>author<br><br><i>58 Thames<br/>           Avenue,<br/>           Greenford,<br/>           Middlesex, UB6<br/>           8JN</i><br><br><i>E:</i><br><a href="mailto:ks704@ic.ac.uk">ks704@ic.ac.uk</a><br><br><i>T:</i><br>00447773642813 |      |                                                                                                                                                                                                                                                                                                                                                                                                                                       |                                                                                      |
| 2 | <b>Arash Aframian</b>                                                                                                                                                                                                                                                    | MRCS | <ul style="list-style-type: none"> <li>• Conceptualisation</li> <li>• Formal analysis</li> <li>• Investigation</li> <li>• Methodology/Design</li> <li>• Planning</li> <li>• Supervise</li> <li>• Data analysis</li> <li>• Writing – reviewing and editing</li> </ul>                                                                                                                                                                  | <a href="mailto:arash.aframian@gmail.com">arash.aframian@gmail.com</a>               |
|   |                                                                                                                                                                                                                                                                          |      |                                                                                                                                                                                                                                                                                                                                                                                                                                       | <a href="http://www.ail.com">ail.com</a>                                             |
| 3 | <b>Chang Park</b>                                                                                                                                                                                                                                                        | MRCS | <ul style="list-style-type: none"> <li>• Conceptualisation</li> <li>• Methodology/Design</li> <li>• Planning</li> <li>• Supervise</li> <li>• Data analysis</li> <li>• Writing – reviewing and editing</li> </ul>                                                                                                                                                                                                                      | <a href="mailto:changpark3@gmail.com">changpark3@gmail.com</a>                       |
|   |                                                                                                                                                                                                                                                                          |      |                                                                                                                                                                                                                                                                                                                                                                                                                                       | <a href="http://www.com">com</a>                                                     |
| 4 | <b>Khaled M Sarraf</b><br>(senior author)                                                                                                                                                                                                                                | FRCS | <ul style="list-style-type: none"> <li>• Conceptualisation</li> <li>• Investigation</li> <li>• Methodology/Design</li> <li>• Planning</li> <li>• Project administration</li> <li>• Resources</li> </ul>                                                                                                                                                                                                                               | <a href="mailto:khaled.sarraf@nhs.uk">khaled.sarraf@nhs.uk</a>                       |
|   |                                                                                                                                                                                                                                                                          |      |                                                                                                                                                                                                                                                                                                                                                                                                                                       | <a href="http://www.et">et</a>                                                       |

- Supervise
- Writing – reviewing and editing

629

630

631

632

633

634

### COVERT Collaborators

**Affiliation: Department of Trauma and Orthopaedics, Imperial College Healthcare  
NHS Trust, London, W2 1NY, England**

|    | <b>Name</b>        | <b>Qualifi-<br/>cation</b> | <b>Contribution</b>                                                                                                  | <b>E-mail</b>                                                        |
|----|--------------------|----------------------------|----------------------------------------------------------------------------------------------------------------------|----------------------------------------------------------------------|
| 5  | Thomas<br>Ashdown  | MRCS                       | <ul style="list-style-type: none"> <li>• Data curation</li> <li>• Formal analysis</li> <li>• Resources</li> </ul>    | <a href="mailto:thomas.ashdown@nhs.net">thomas.ashdown@nhs.net</a>   |
| 6  | Ramla Ali          | MBBS                       | <ul style="list-style-type: none"> <li>• Data curation</li> <li>• Formal analysis</li> <li>• Resources</li> </ul>    | <a href="mailto:ramla.ali@nhs.net">ramla.ali@nhs.net</a>             |
| 7  | William<br>Harland | MBBS                       | <ul style="list-style-type: none"> <li>• Data curation</li> <li>• Formal analysis</li> <li>• Resources</li> </ul>    | <a href="mailto:william.harland@nhs.net">william.harland@nhs.net</a> |
| 8  | Charles<br>Hallett | MBBS                       | <ul style="list-style-type: none"> <li>• Data curation</li> <li>• Formal analysis</li> <li>• Resources</li> </ul>    | <a href="mailto:Ortho@pansurg.org">Ortho@pansurg.org</a>             |
| 9  | Chinmay<br>Gupte   | FRCS                       | <ul style="list-style-type: none"> <li>• Project administration</li> <li>• Resources</li> <li>• Supervise</li> </ul> | <a href="mailto:c.gupte00@ic.ac.uk">c.gupte00@ic.ac.uk</a>           |
| 10 | Dominic<br>Spicer  | FRCS                       | <ul style="list-style-type: none"> <li>• Project administration</li> <li>• Resources</li> <li>• Supervise</li> </ul> | <a href="mailto:dominic.spicer@nhs.net">dominic.spicer@nhs.net</a>   |
| 11 | Robin<br>Strachan  | FRCS                       | <ul style="list-style-type: none"> <li>• Project administration</li> <li>• Resources</li> <li>• Supervise</li> </ul> | <a href="mailto:robin.strachan@nhs.net">robin.strachan@nhs.net</a>   |

|    |                       |      |                                                                                                                      |                                                                                  |
|----|-----------------------|------|----------------------------------------------------------------------------------------------------------------------|----------------------------------------------------------------------------------|
| 12 | Dinesh Nathwani       | FRCS | <ul style="list-style-type: none"> <li>• Project administration</li> <li>• Resources</li> <li>• Supervise</li> </ul> | <a href="mailto:d.nathwani@imperial.ac.uk">d.nathwani@imperial.ac.uk</a>         |
| 13 | Rajarshi Bhattacharya | FRCS | <ul style="list-style-type: none"> <li>• Project administration</li> <li>• Resources</li> <li>• Supervise</li> </ul> | <a href="mailto:rajarshi.bhattacharya@nhs.net">rajarshi.bhattacharya@nhs.net</a> |

635

636 **Affiliation: Department of Trauma and Orthopaedics, Chelsea and Westminster Hospital**637 **NHS Foundation Trust, London, SW10 9NH, England**

|    | Name                    | Qualification | Contribution                                                                                                                                        | E-mail                                                                     |
|----|-------------------------|---------------|-----------------------------------------------------------------------------------------------------------------------------------------------------|----------------------------------------------------------------------------|
| 14 | Catrin Morgan           | MRCS          | <ul style="list-style-type: none"> <li>• Data curation</li> <li>• Formal analysis</li> <li>• Project administration</li> <li>• Supervise</li> </ul> | <a href="mailto:catrin.morgan@nhs.net">catrin.morgan@nhs.net</a>           |
| 15 | Katharine Bennett-Brown | MRCS          | <ul style="list-style-type: none"> <li>• Data curation</li> <li>• Formal analysis</li> <li>• Resources</li> </ul>                                   | <a href="mailto:katebennettbrown@gmail.com">katebennettbrown@gmail.com</a> |
| 16 | Henry Simon             | MRCS          | <ul style="list-style-type: none"> <li>• Data curation</li> <li>• Formal analysis</li> <li>• Resources</li> </ul>                                   | <a href="mailto:henrysimon@hotmail.co.uk">henrysimon@hotmail.co.uk</a>     |
| 17 | Rupen Dattani           | FRCS          | <ul style="list-style-type: none"> <li>• Project administration</li> <li>• Resources</li> <li>• Supervise</li> </ul>                                | <a href="mailto:rupen.dattani@nhs.net">rupen.dattani@nhs.net</a>           |

638

639 **Affiliation: Department of Trauma and Orthopaedics, Queen Elizabeth Hospital,**640 **Gateshead Health NHS Foundation Trust, Gateshead, NE9 6SX, England**

|    | Name        | Qualification | Contribution                                                                                                                   | E-mail                                                       |
|----|-------------|---------------|--------------------------------------------------------------------------------------------------------------------------------|--------------------------------------------------------------|
| 18 | Adham Mousa | MRCS          | <ul style="list-style-type: none"> <li>• Data curation</li> <li>• Formal analysis</li> <li>• Project administration</li> </ul> | <a href="mailto:adham.mousa@nhs.net">adham.mousa@nhs.net</a> |

|    |    |           |             |                                                                        |
|----|----|-----------|-------------|------------------------------------------------------------------------|
| 1  |    |           |             |                                                                        |
| 2  |    |           |             |                                                                        |
| 3  |    |           |             |                                                                        |
| 4  |    |           | • Supervise |                                                                        |
| 5  | 19 | Karen     | MRCS        | • Data curation                                                        |
| 6  |    |           |             | <a href="mailto:karen.vejsbjerg1@nhs.net">karen.vejsbjerg1@nhs.net</a> |
| 7  |    | Vejsbjerg |             | • Formal analysis                                                      |
| 8  |    |           |             | • Resources                                                            |
| 9  |    |           |             |                                                                        |
| 10 | 20 | Michael   | MBBS        | • Data curation                                                        |
| 11 |    |           |             | <a href="mailto:michael.zhang1@nhs.net">michael.zhang1@nhs.net</a>     |
| 12 |    | Zhang     |             | • Formal analysis                                                      |
| 13 |    |           |             | • Resources                                                            |
| 14 |    |           |             |                                                                        |
| 15 | 21 | Vikas     | MBBS        | • Data curation                                                        |
| 16 |    |           |             | <a href="mailto:vikas.kumar7@nhs.net">vikas.kumar7@nhs.net</a>         |
| 17 |    | Kumar     |             | • Formal analysis                                                      |
| 18 |    |           |             | • Resources                                                            |
| 19 |    |           |             |                                                                        |
| 20 | 22 | Hannah    | MBBS        | • Data curation                                                        |
| 21 |    |           |             | <a href="mailto:hannah.emerson2@nhs.net">hannah.emerson2@nhs.net</a>   |
| 22 |    | Emerson   |             | • Formal analysis                                                      |
| 23 |    |           |             | • Resources                                                            |
| 24 |    |           |             |                                                                        |
| 25 | 23 | Andrew    | MBBS        | • Data curation                                                        |
| 26 |    |           |             | <a href="mailto:andrew.oliver2@nhs.net">andrew.oliver2@nhs.net</a>     |
| 27 |    | Oliver    |             | • Formal analysis                                                      |
| 28 |    |           |             | • Resources                                                            |
| 29 |    |           |             |                                                                        |
| 30 | 24 | Callum    | MBBS        | • Data curation                                                        |
| 31 |    |           |             | <a href="mailto:callum.smith8@nhs.net">callum.smith8@nhs.net</a>       |
| 32 |    | Smith     |             | • Formal analysis                                                      |
| 33 |    |           |             | • Resources                                                            |
| 34 |    |           |             |                                                                        |
| 35 | 25 | Andreas   | FRCS        | • Project administration                                               |
| 36 |    |           |             | <a href="mailto:a.hinsche@nhs.net">a.hinsche@nhs.net</a>               |
| 37 |    | Hinsche   |             | • Resources                                                            |
| 38 |    |           |             | • Supervise                                                            |
| 39 |    |           |             |                                                                        |

641

642 **Affiliation: Department of Trauma and Orthopaedics, Darent Valley Hospital,**643 **Dartford and Gravesham NHS Trust, Dartford, DA2 8DA, England**

|    | <b>Name</b> | <b>Qualifi-<br/>cation</b> | <b>Contribution</b> | <b>E-mail</b>                                                            |
|----|-------------|----------------------------|---------------------|--------------------------------------------------------------------------|
| 45 |             |                            |                     |                                                                          |
| 46 |             |                            |                     |                                                                          |
| 47 |             |                            |                     |                                                                          |
| 48 |             |                            |                     |                                                                          |
| 49 | 26          | Markus L                   | MRCS                | • Data curation                                                          |
| 50 |             |                            |                     | <a href="mailto:markus.sagmeister@nhs.net">markus.sagmeister@nhs.net</a> |
| 51 |             | Sagmeister                 |                     | • Formal analysis                                                        |
| 52 |             |                            |                     | • Project administration                                                 |
| 53 |             |                            |                     | • Supervise                                                              |
| 54 |             |                            |                     |                                                                          |
| 55 | 27          | Gihan                      | MRCS                | • Data curation                                                          |
| 56 |             |                            |                     | <a href="mailto:gihan.jayasinghe@nhs.net">gihan.jayasinghe@nhs.net</a>   |
| 57 |             | Jayasinghe                 |                     | • Formal analysis                                                        |
| 58 |             |                            |                     | • Resources                                                              |
| 59 |             |                            |                     |                                                                          |
| 60 |             |                            |                     |                                                                          |

- 1  
2  
3  
4 28 Marissa MBBS • Data curation [marissa.lewis2@nhs.net](mailto:marissa.lewis2@nhs.net)  
5 Lewis • Formal analysis  
6 • Resources  
7  
8 29 Michael MBBS • Data curation [michael.avery@nhs.net](mailto:michael.avery@nhs.net)  
9 Avery • Formal analysis  
10 • Resources  
11  
12

644

645

**Affiliation: Department of Trauma and Orthopaedics, Royal Berkshire NHS**

646

**Foundation Trust, Reading, RG1 5AN, England**

| Name               | Qualification | Contribution                                                                                                                                        | E-mail                                                                   |
|--------------------|---------------|-----------------------------------------------------------------------------------------------------------------------------------------------------|--------------------------------------------------------------------------|
| 30 Tariq Aboelmagd | MRCS          | <ul style="list-style-type: none"> <li>• Data curation</li> <li>• Formal analysis</li> <li>• Project administration</li> <li>• Supervise</li> </ul> | <a href="mailto:taboelmagd@doctors.org.uk">taboelmagd@doctors.org.uk</a> |
| 31 Shireen Ibish   | MRCS          | <ul style="list-style-type: none"> <li>• Data curation</li> <li>• Formal analysis</li> <li>• Resources</li> </ul>                                   | <a href="mailto:shireen.ibish@nhs.net">shireen.ibish@nhs.net</a>         |
| 32 Ruben Thumbadoo | MRCS          | <ul style="list-style-type: none"> <li>• Data curation</li> <li>• Formal analysis</li> <li>• Resources</li> </ul>                                   | <a href="mailto:ruben.thumbadoo@nhs.net">ruben.thumbadoo@nhs.net</a>     |
| 33 Asanka Wijendra | MRCS          | <ul style="list-style-type: none"> <li>• Data curation</li> <li>• Formal analysis</li> <li>• Resources</li> </ul>                                   | <a href="mailto:awijendra@gmail.com">awijendra@gmail.com</a>             |
| 34 Joseph Dixon    | MRCS          | <ul style="list-style-type: none"> <li>• Data curation</li> <li>• Formal analysis</li> <li>• Resources</li> </ul>                                   | <a href="mailto:joedixon@doctors.org.uk">joedixon@doctors.org.uk</a>     |
| 35 Vatsal Gupta    | MRCS          | <ul style="list-style-type: none"> <li>• Data curation</li> <li>• Formal analysis</li> <li>• Resources</li> </ul>                                   | <a href="mailto:vatsalg001@gmail.com">vatsalg001@gmail.com</a>           |

647

648

**Affiliation: Department of Trauma and Orthopaedics, James Cook University Hospital, South**

649

**Tees NHS Foundation Trust, Middlesbrough, TS4 3BW, England**

|    | Name                 | Qualification | Contribution                                                                                                                                        | E-mail                                                             |
|----|----------------------|---------------|-----------------------------------------------------------------------------------------------------------------------------------------------------|--------------------------------------------------------------------|
| 36 | Laura Clifton        | MRCS          | <ul style="list-style-type: none"> <li>• Data curation</li> <li>• Formal analysis</li> <li>• Project administration</li> <li>• Supervise</li> </ul> | <a href="mailto:laura.clifton8@nhs.net">laura.clifton8@nhs.net</a> |
| 37 | Suhib Taher          | MRCS          | <ul style="list-style-type: none"> <li>• Data curation</li> <li>• Formal analysis</li> <li>• Resources</li> </ul>                                   | <a href="mailto:Suhib.taher@nhs.net">Suhib.taher@nhs.net</a>       |
| 38 | Nicholas Jia Jie Wei | MRCS          | <ul style="list-style-type: none"> <li>• Data curation</li> <li>• Formal analysis</li> <li>• Resources</li> </ul>                                   | <a href="mailto:nicholas.wei1@nhs.net">nicholas.wei1@nhs.net</a>   |
| 39 | Emma Reay            | FRCS          | <ul style="list-style-type: none"> <li>• Formal analysis</li> <li>• Resources</li> <li>• Supervise</li> </ul>                                       | <a href="mailto:emma.reay1@nhs.net">emma.reay1@nhs.net</a>         |

650

651 **Affiliation: Department of Trauma and Orthopaedics, Aneurin Bevan University**  
 652 **Health Board, Royal Gwent Hospital, Newport, NP20 2UB, Wales**

|    | Name                  | Qualification | Contribution                                                                                                                                        | E-mail                                                                                     |
|----|-----------------------|---------------|-----------------------------------------------------------------------------------------------------------------------------------------------------|--------------------------------------------------------------------------------------------|
| 40 | Ashish Khurana        | FRCS          | <ul style="list-style-type: none"> <li>• Data curation</li> <li>• Formal analysis</li> <li>• Project administration</li> <li>• Supervise</li> </ul> | <a href="mailto:ashish.khurana@wales.nhs.uk">ashish.khurana@wales.nhs.uk</a>               |
| 41 | Kathryn Rooney        | MRCS          | <ul style="list-style-type: none"> <li>• Data curation</li> <li>• Formal analysis</li> <li>• Resources</li> </ul>                                   | <a href="mailto:Kathryn.Rooney@wales.nhs.uk">Kathryn.Rooney@wales.nhs.uk</a>               |
| 42 | Nakanda Kakaire       | MRCS          | <ul style="list-style-type: none"> <li>• Data curation</li> <li>• Formal analysis</li> <li>• Resources</li> </ul>                                   | <a href="mailto:nakandamiriam.kakaire@wales.nhs.uk">nakandamiriam.kakaire@wales.nhs.uk</a> |
| 43 | Oluwawye misi Adesina | MRCS          | <ul style="list-style-type: none"> <li>• Data curation</li> <li>• Formal analysis</li> <li>• Resources</li> </ul>                                   | <a href="mailto:quentinpz@yahoo.com">quentinpz@yahoo.com</a>                               |

653



Figure 2: Types and mechanisms of injuries for operative cases

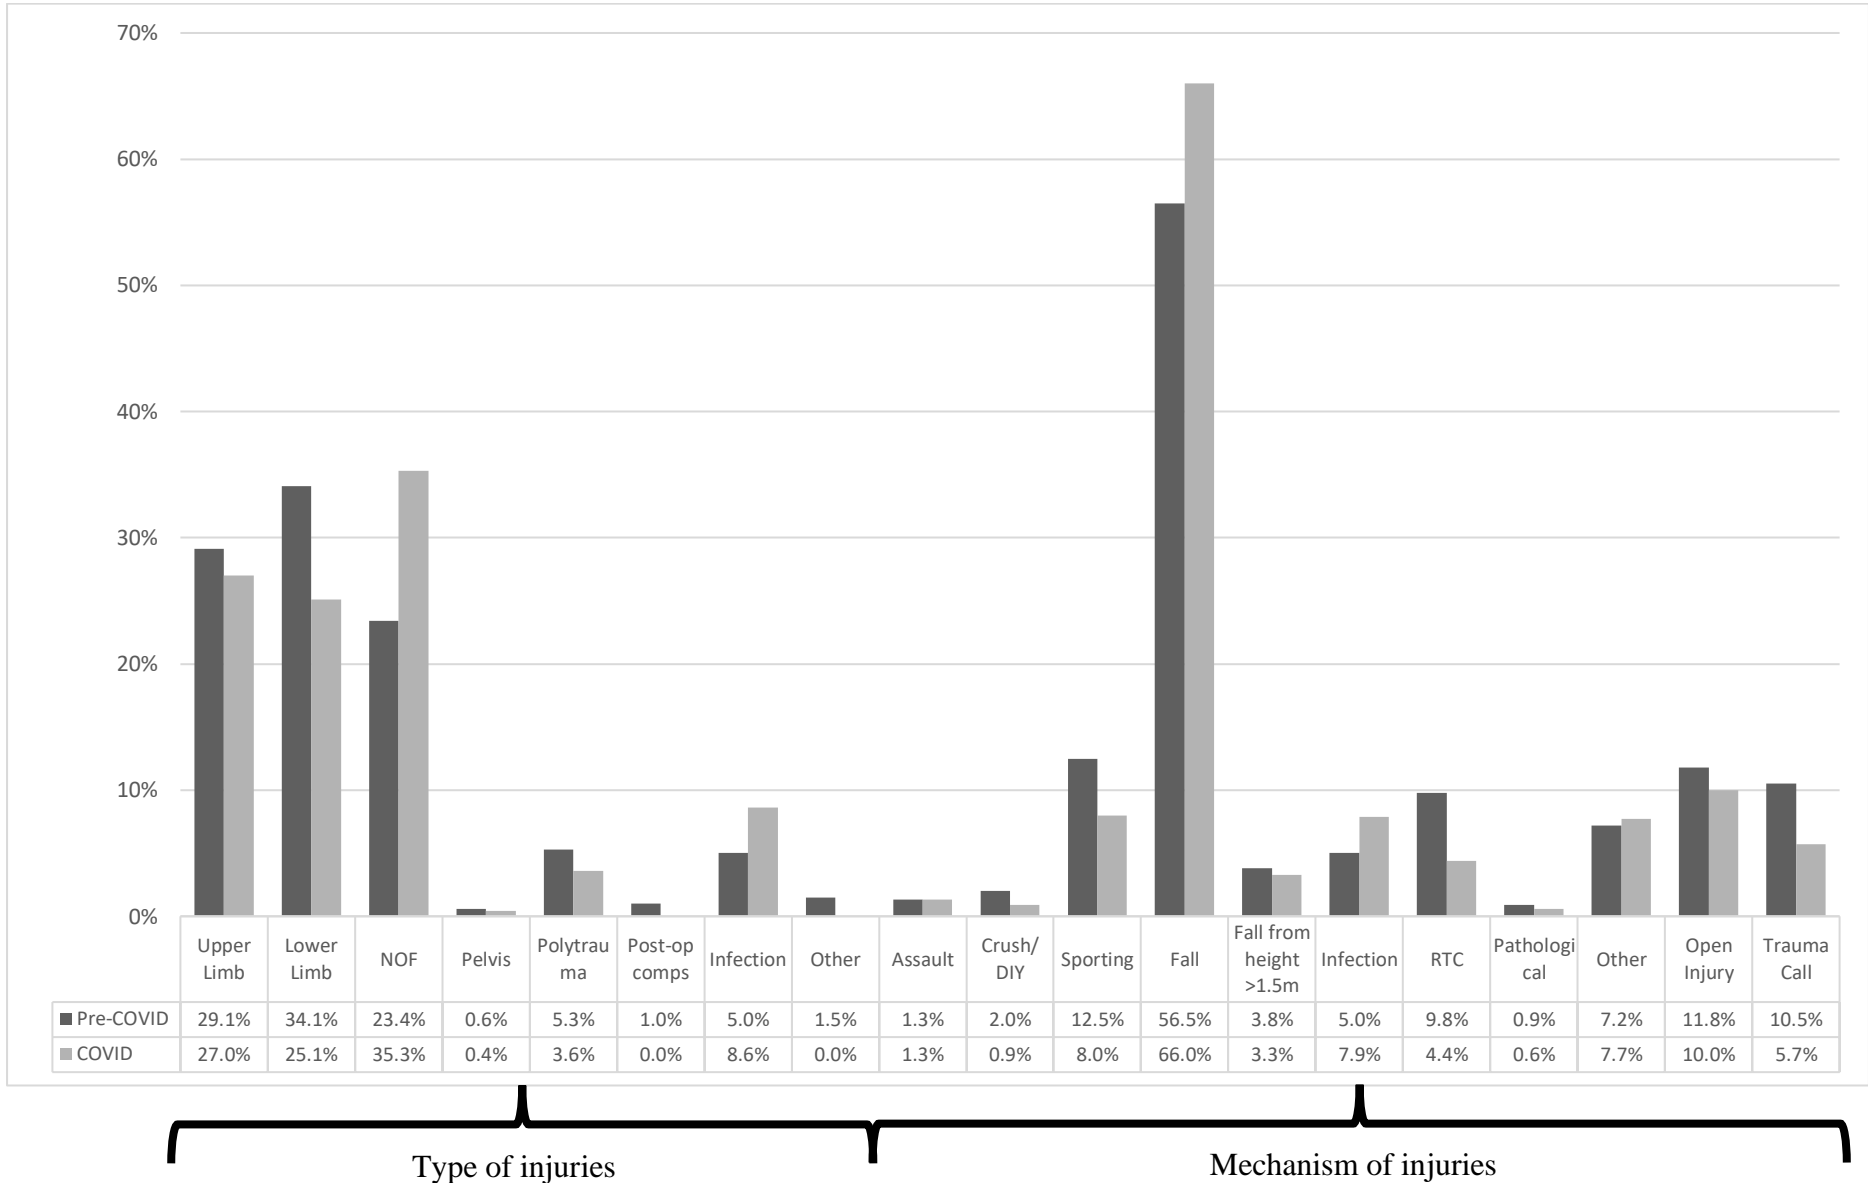



Figure 3: operative and anaesthetic techniques compared between pre- and post-COVID

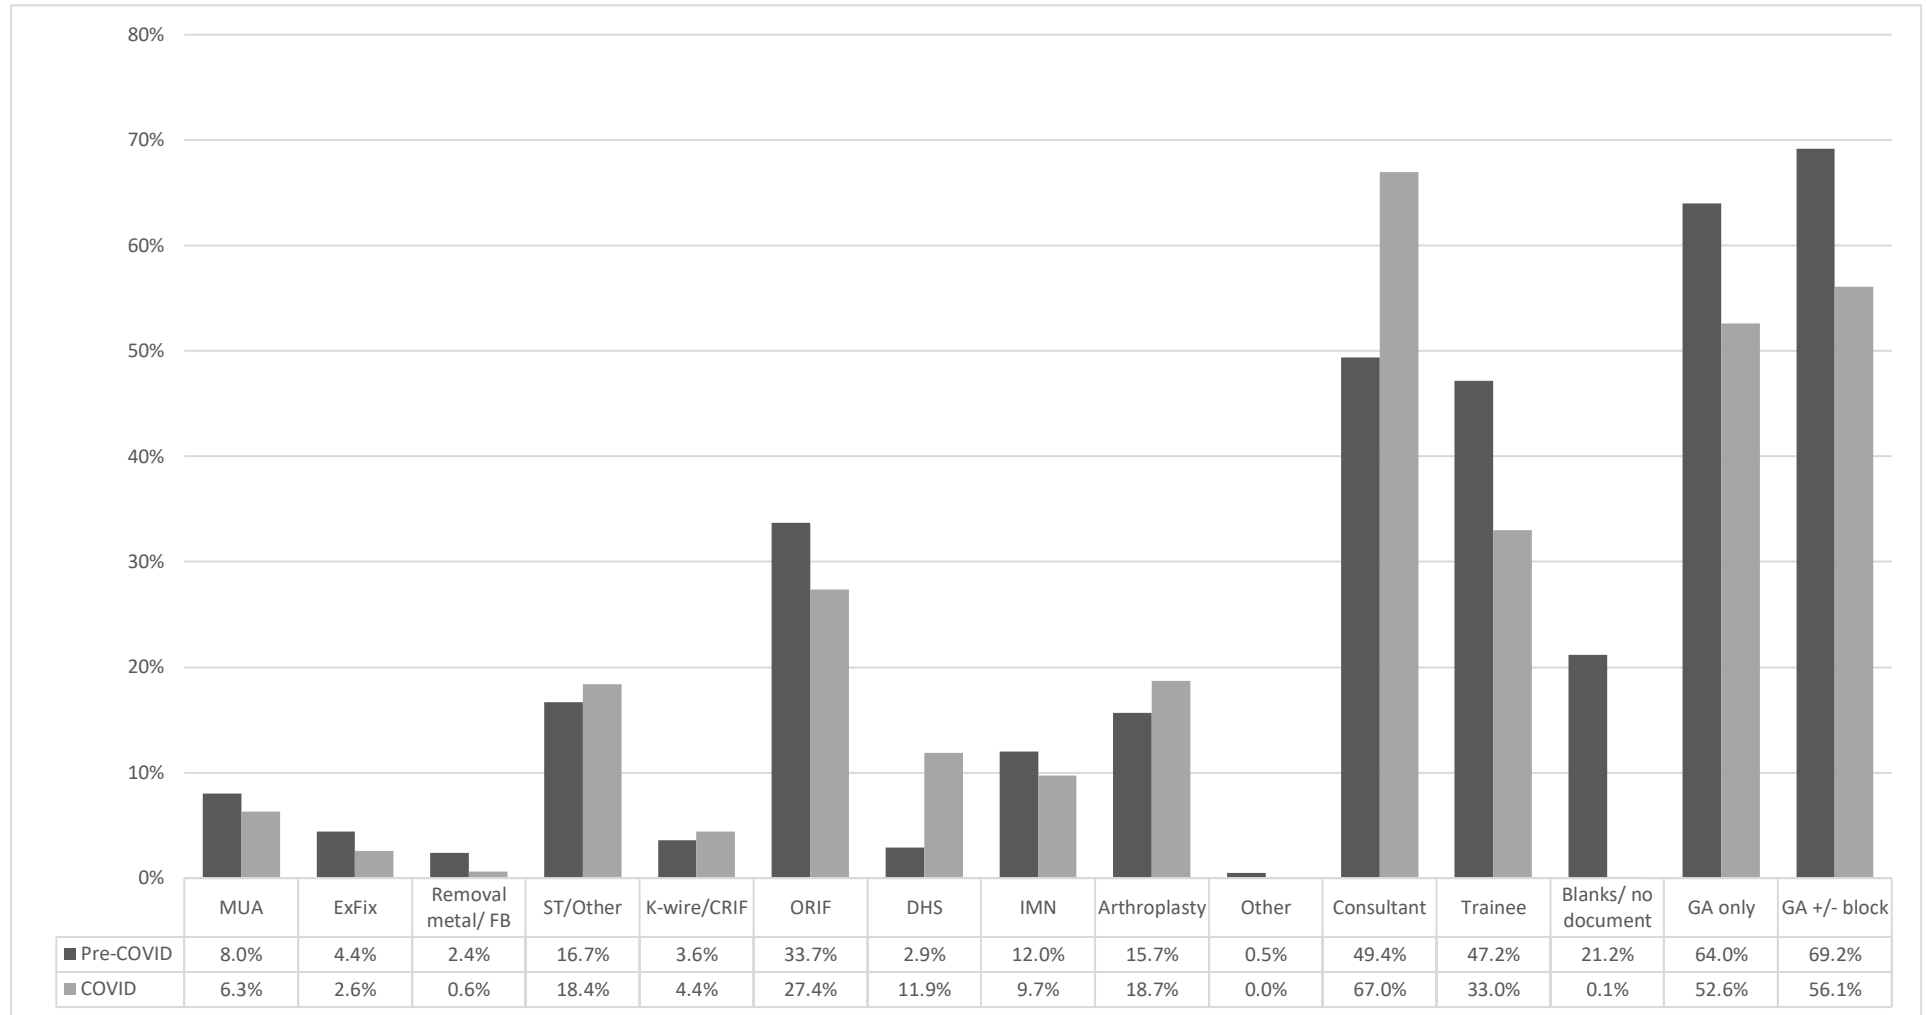

Type of injuries
Primary surgeon
Anaesthetic technique

1  
2  
3  
4  
5  
6  
7  
8  
9  
10  
11  
12  
13  
14  
15  
16  
17  
18  
19  
20  
21  
22  
23  
24  
25  
26  
27  
28  
29  
30  
31  
32  
33  
34  
35  
36  
37  
38  
39  
40  
41  
42  
43  
44  
45  
46

Figure 4: COVID status of both cohorts including positive results in all mortalities (with 5% error bars)

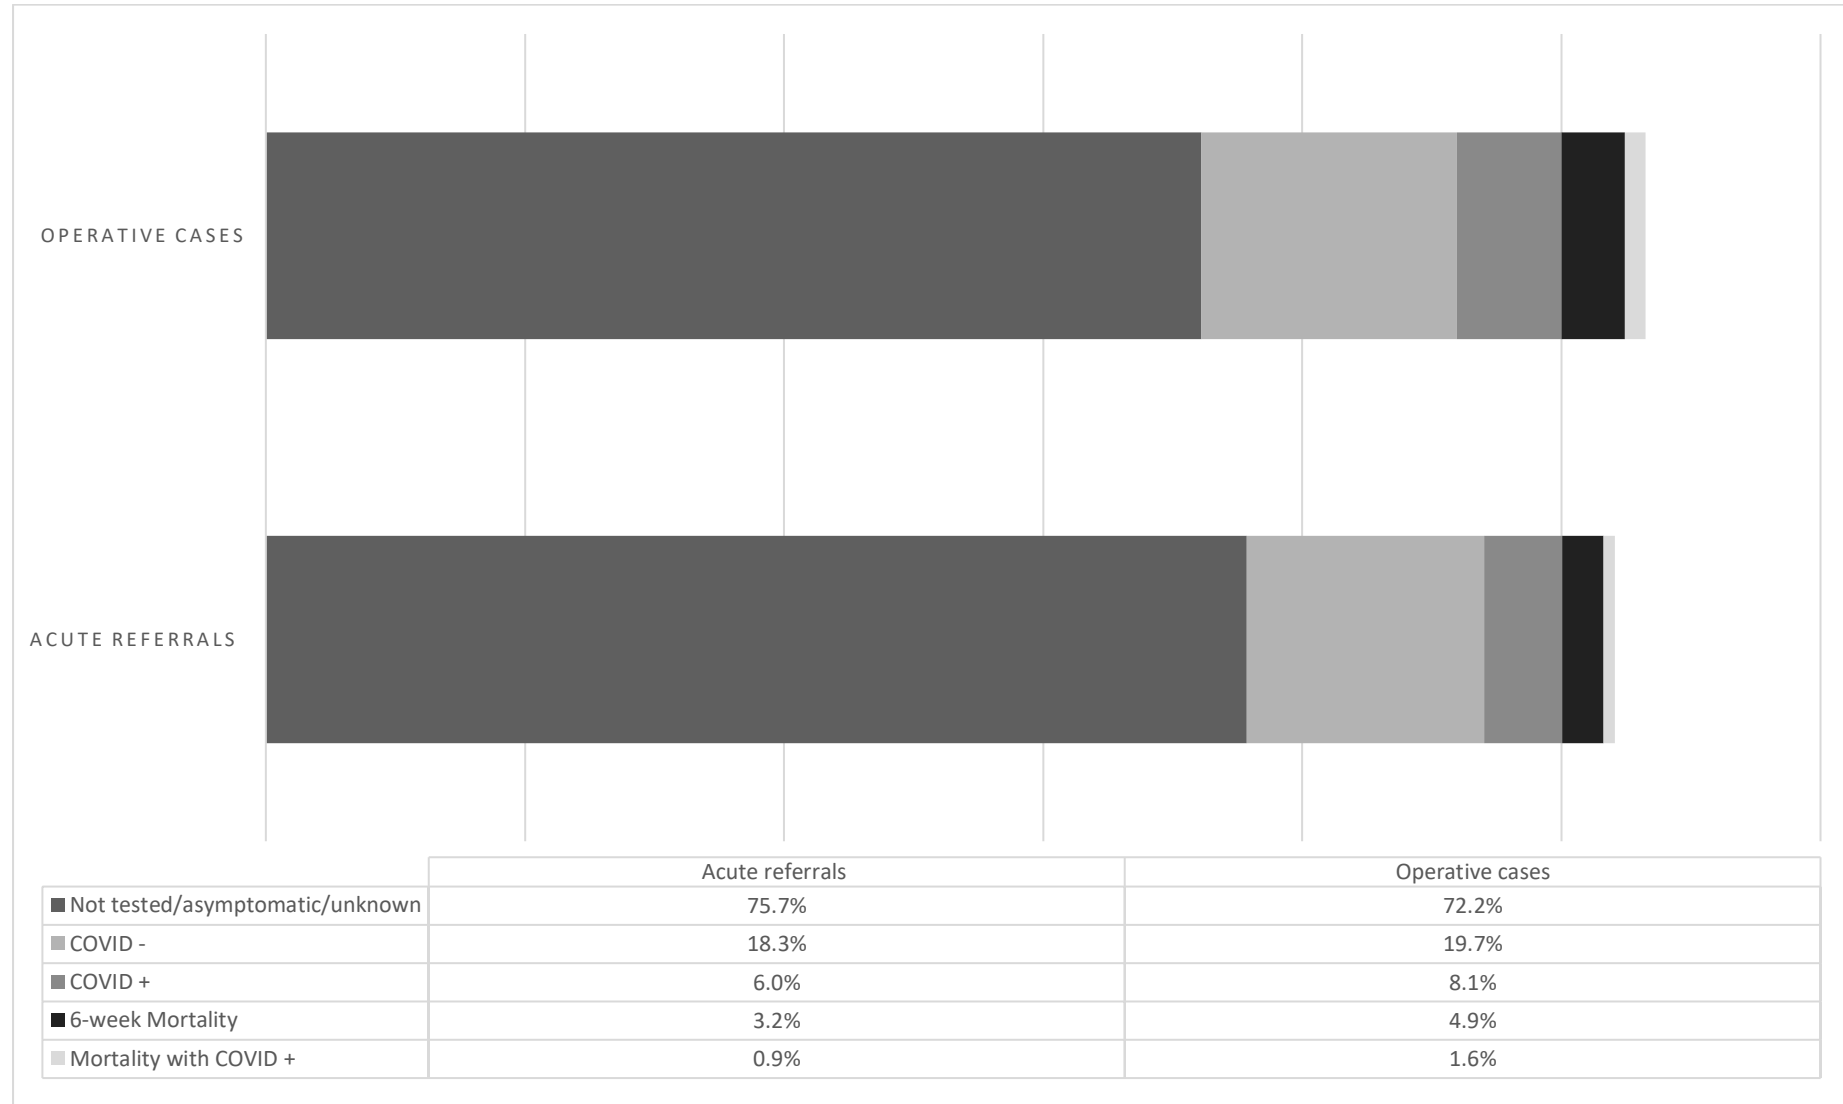

Figure 5: types and mechanism of injury for mortalities in acute referral cohorts

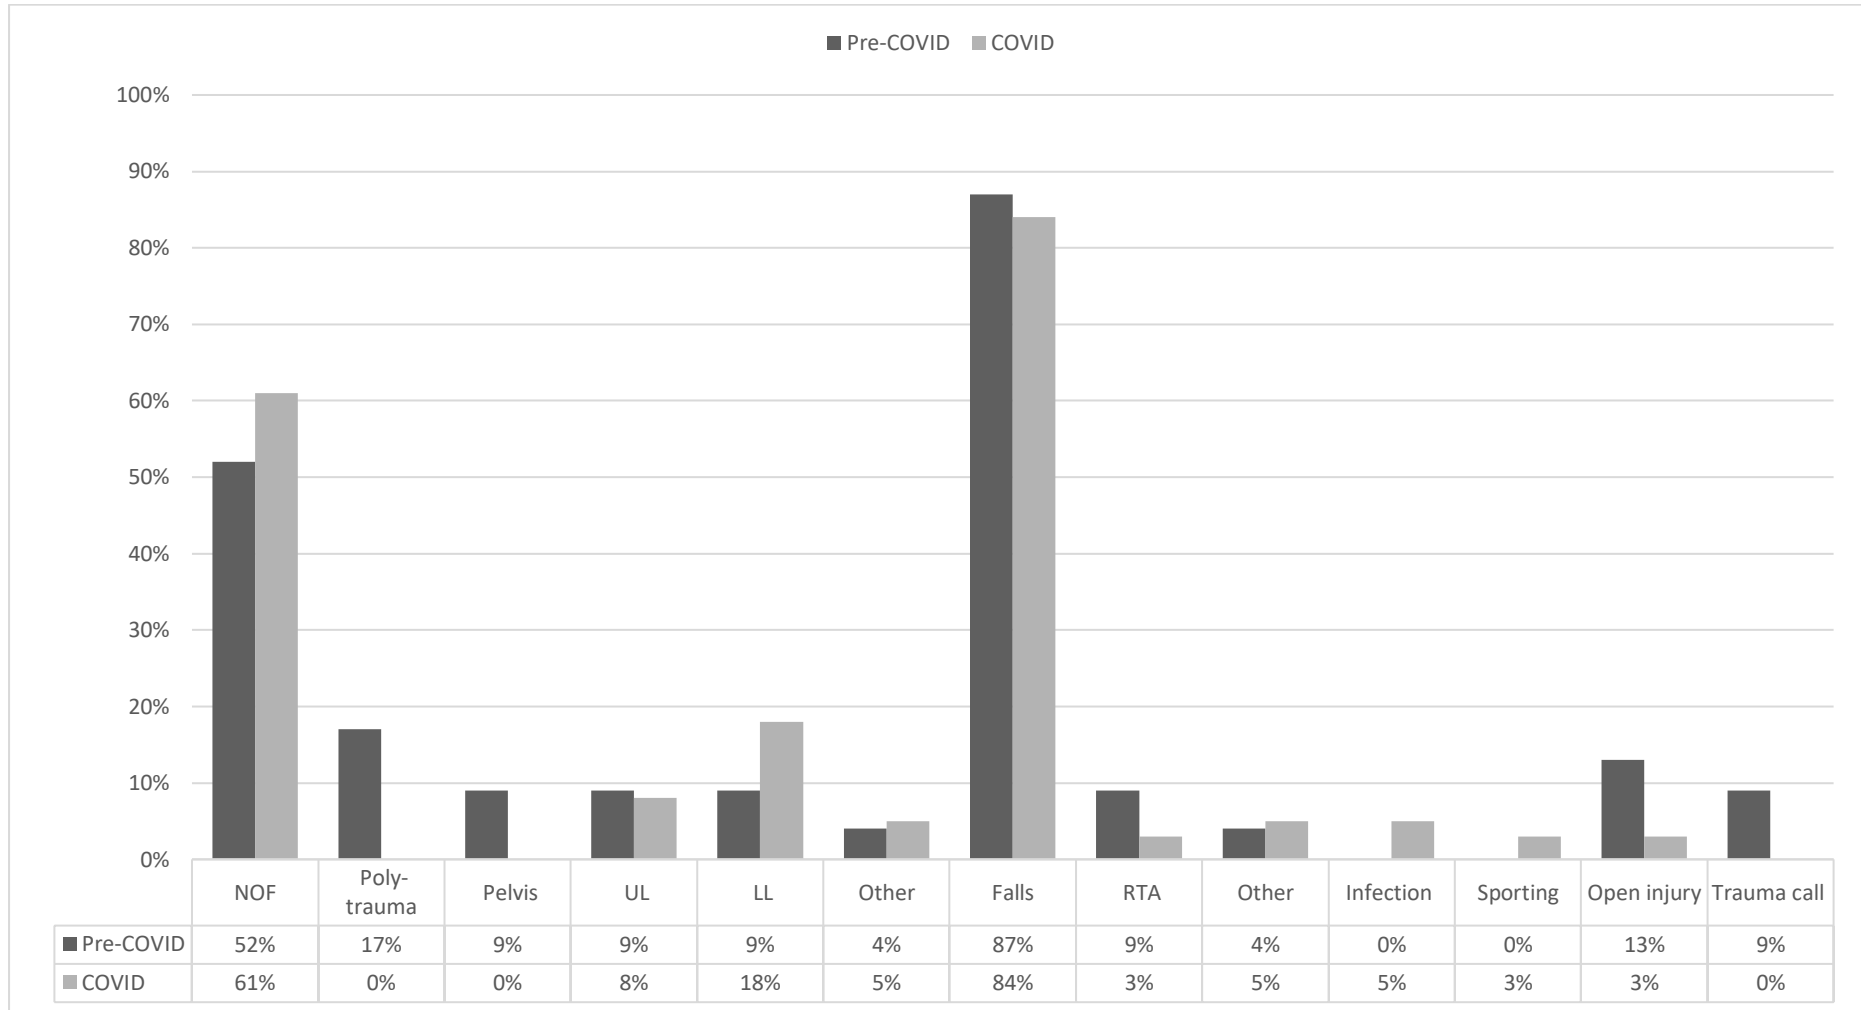

Key: UL: upper limb / LL: lower limb / RTA: road traffic accidents

Figure 6: types and mechanism of injury for mortalities in operative casemix cohorts

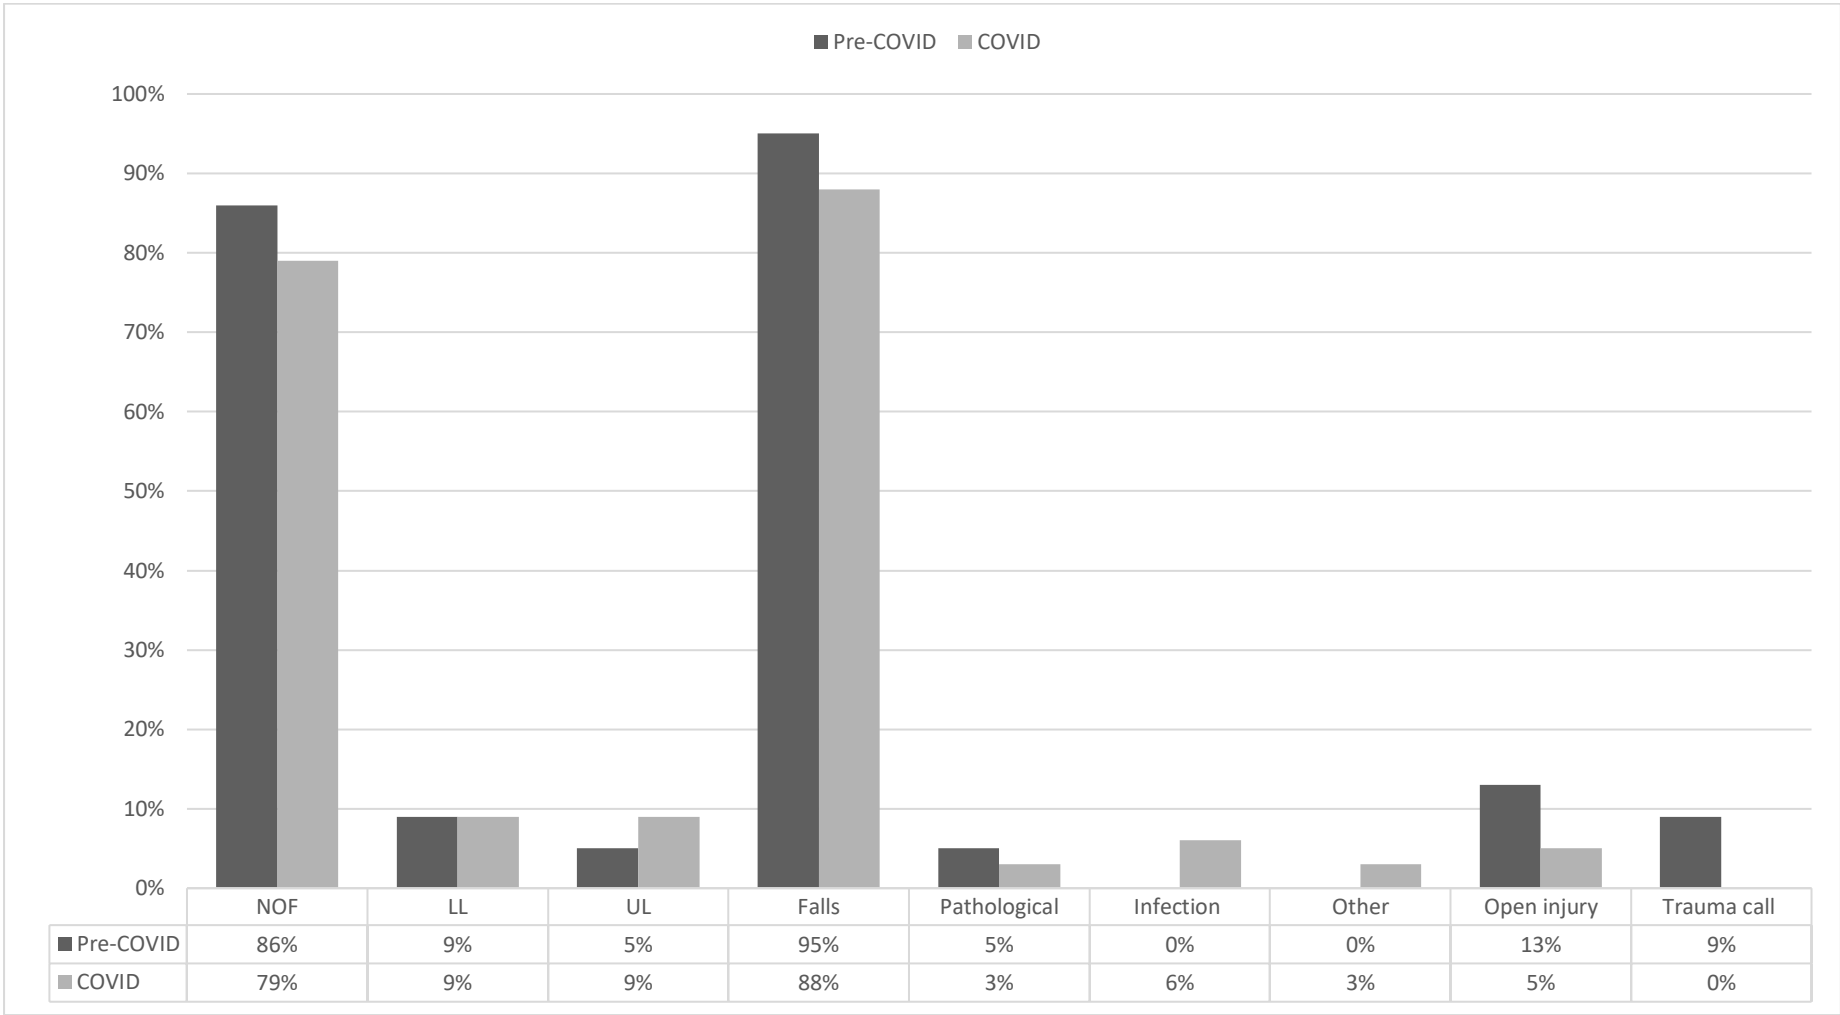

Key: NOF: neck of femur fracture / UL: upper limb / LL: lower limb

Figure 7: Surgical and anaesthetic techniques utilised in mortalities as a means of proportions

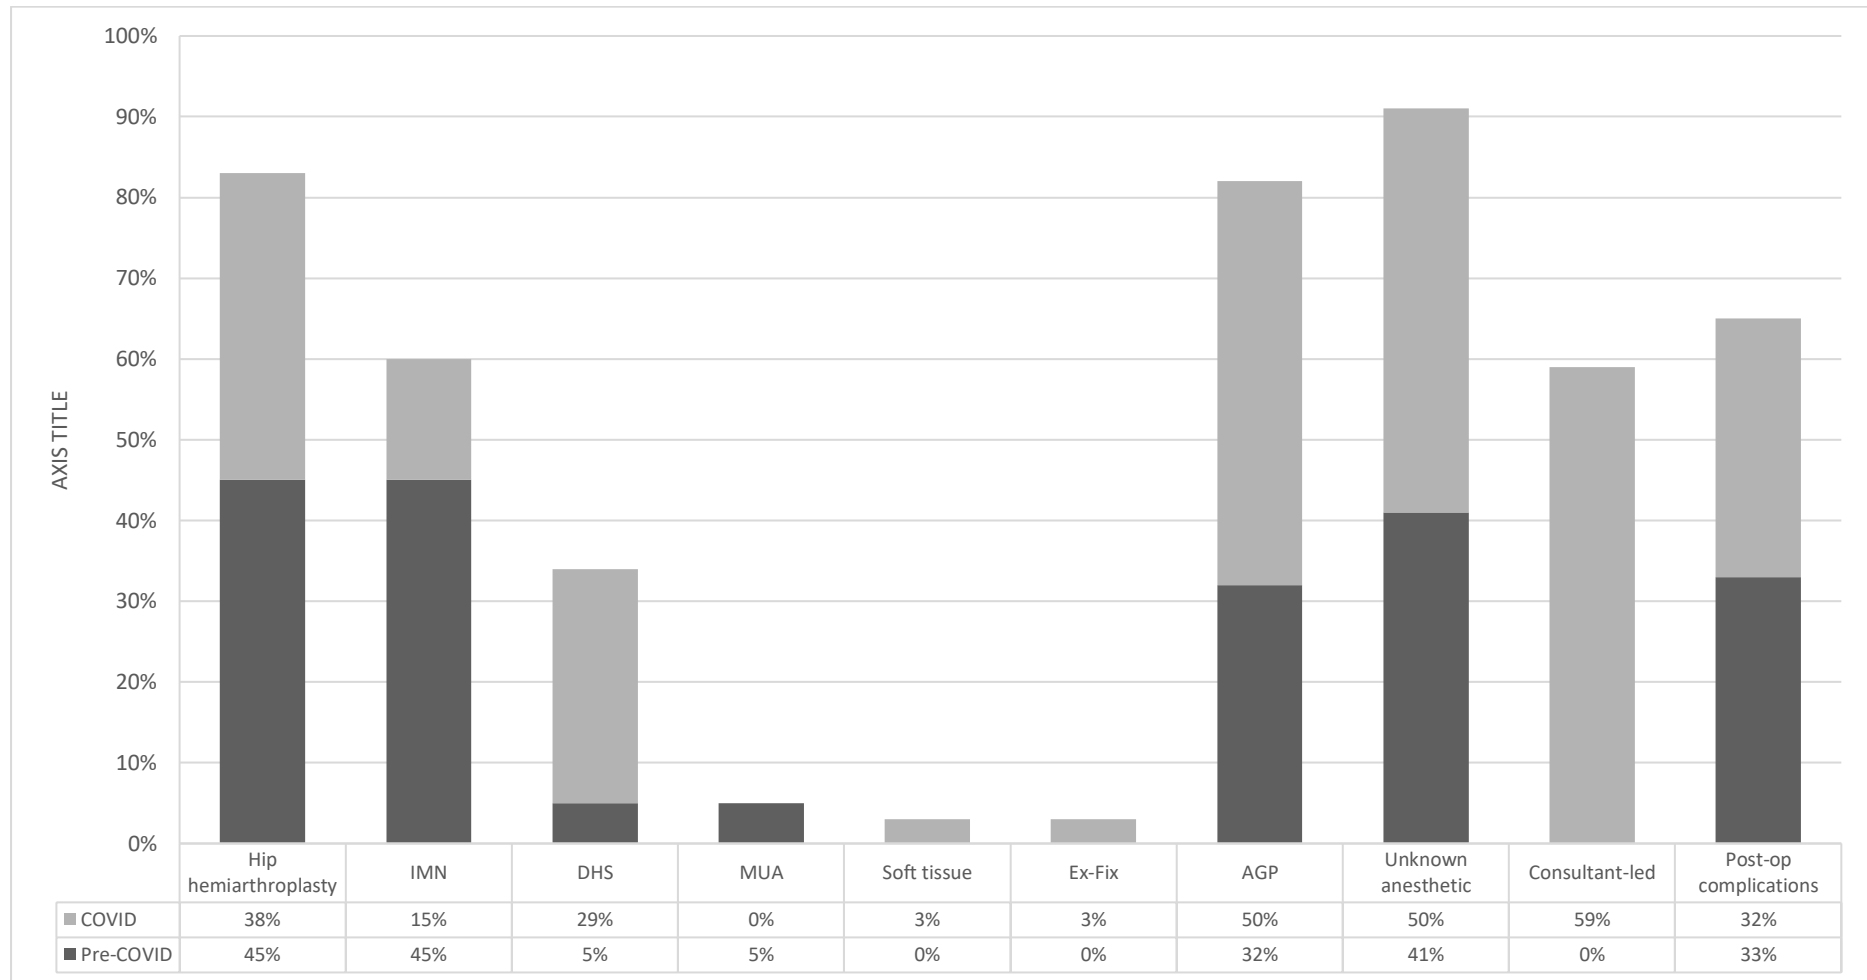

**Key:** IMN: intramedullary nailing / DHS: dynamic hip screw / MUA: manipulation under anaesthesia / Ex-Fix: external fixation / AGP: aerosolizing-generating procedures

Figure 8: Post-operative complications for both years

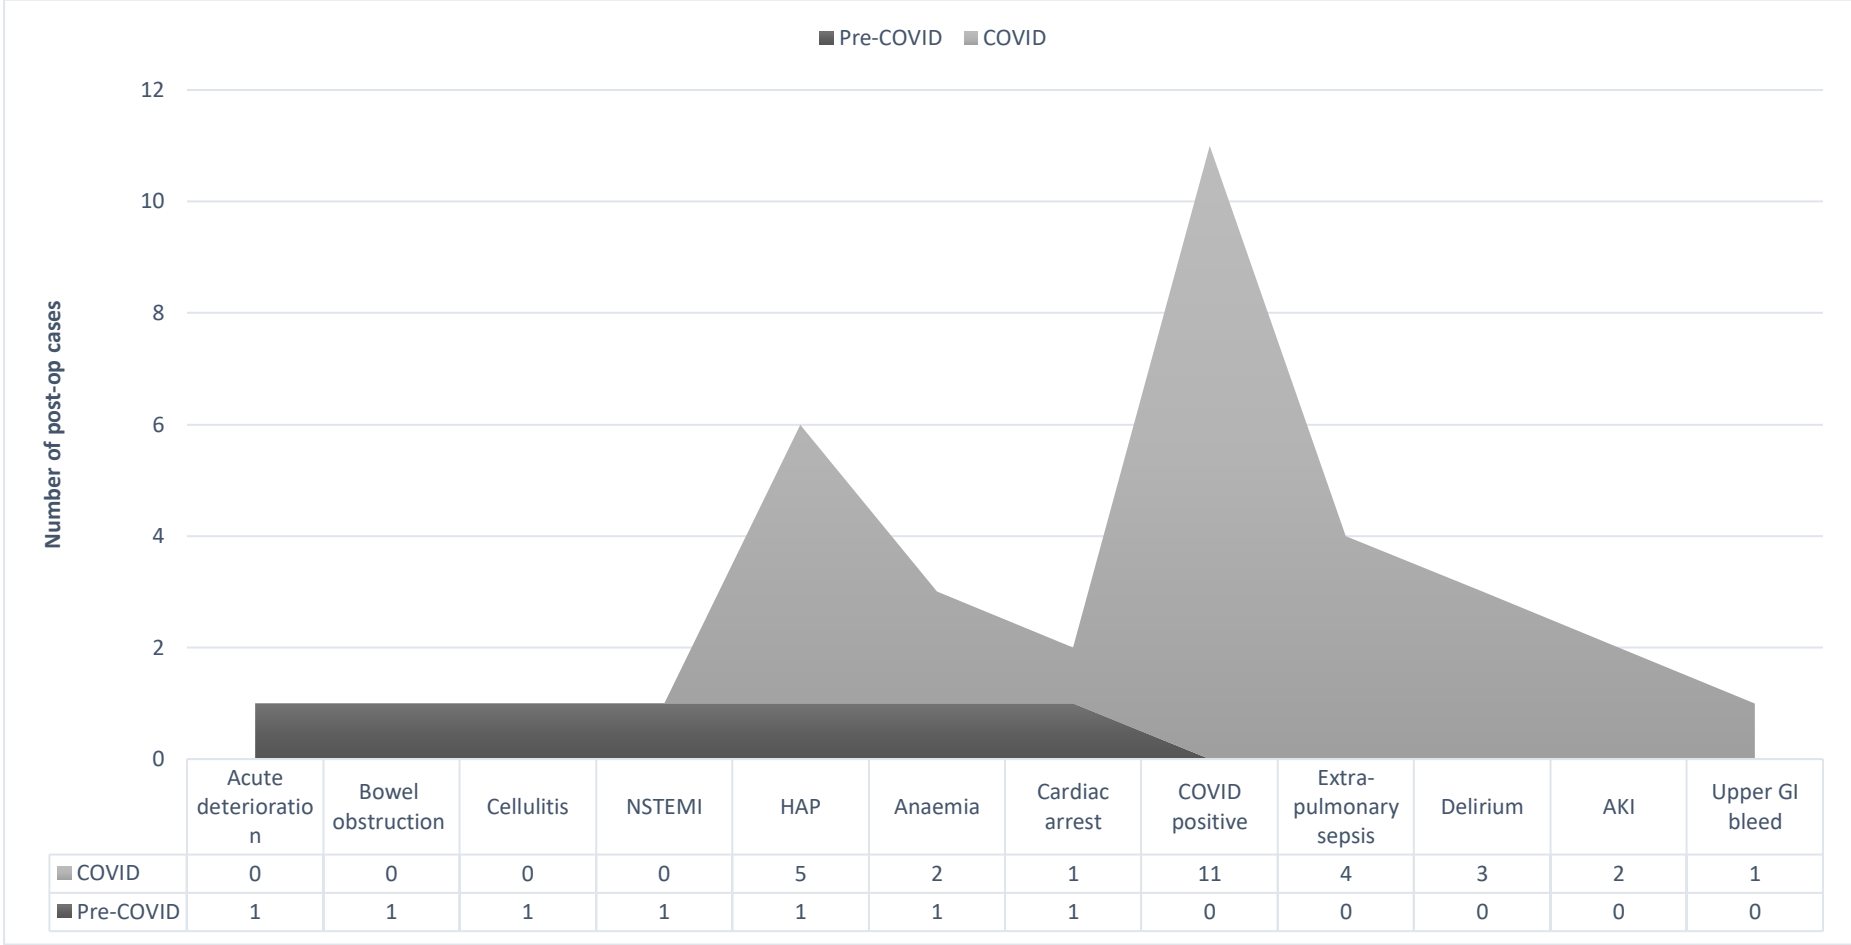

Key: NSTEMI: non-ST elevated myocardial infarction, HAP: hospital-acquired pneumonia, AKI: acute kidney injury, GI: gastrointestinal

Figure 9: Type of comorbidities for all mortalities in both years

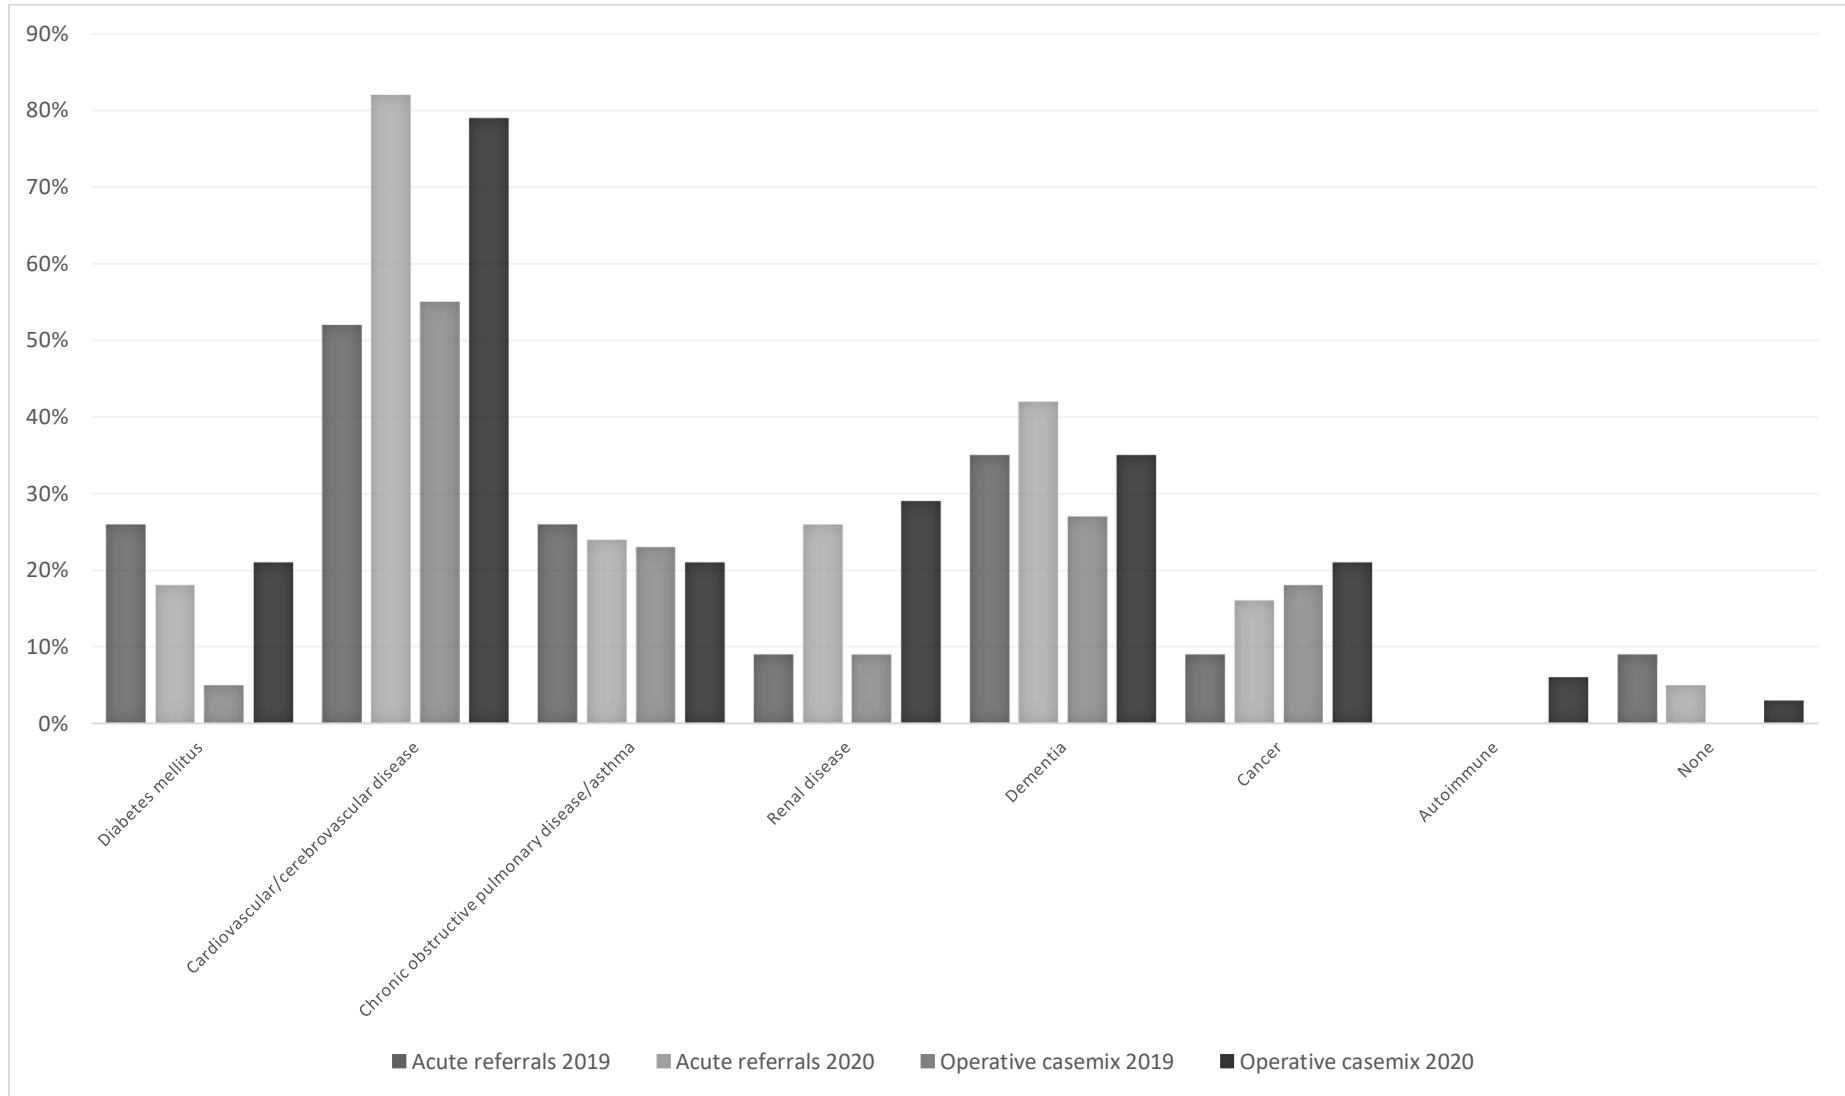

1  
2  
3  
4  
5  
6  
7  
8  
9  
10  
11  
12  
13  
14  
15  
16  
17  
18  
19  
20  
21  
22  
23  
24  
25  
26  
27  
28  
29  
30  
31  
32  
33  
34  
35  
36  
37  
38  
39  
40  
41  
42  
43  
44  
45  
46

Figure 10: number of comorbidities for all mortalities in both years

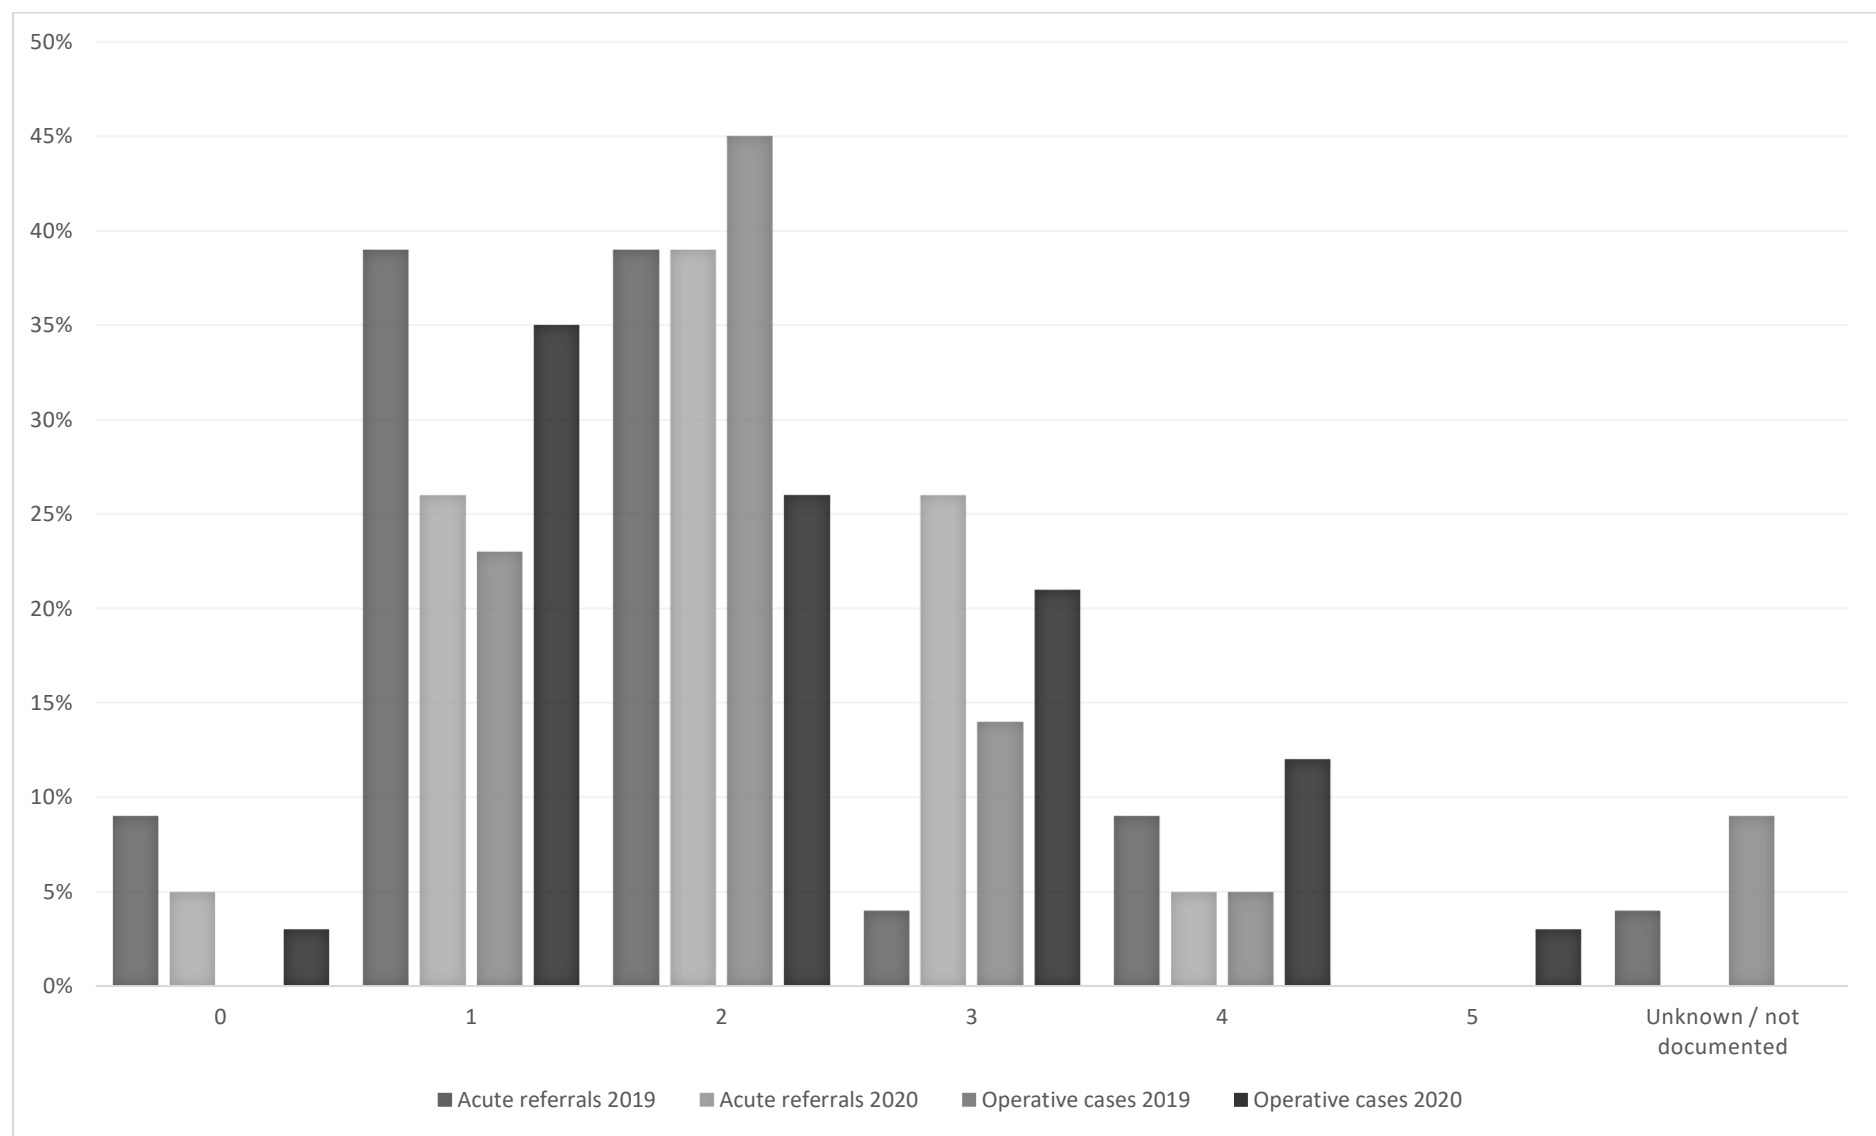



Figure 11: Six-week Kaplan-Meier survival probability analysis for mortalities between pre- and post-COVID for acutely referred from the Emergency Department

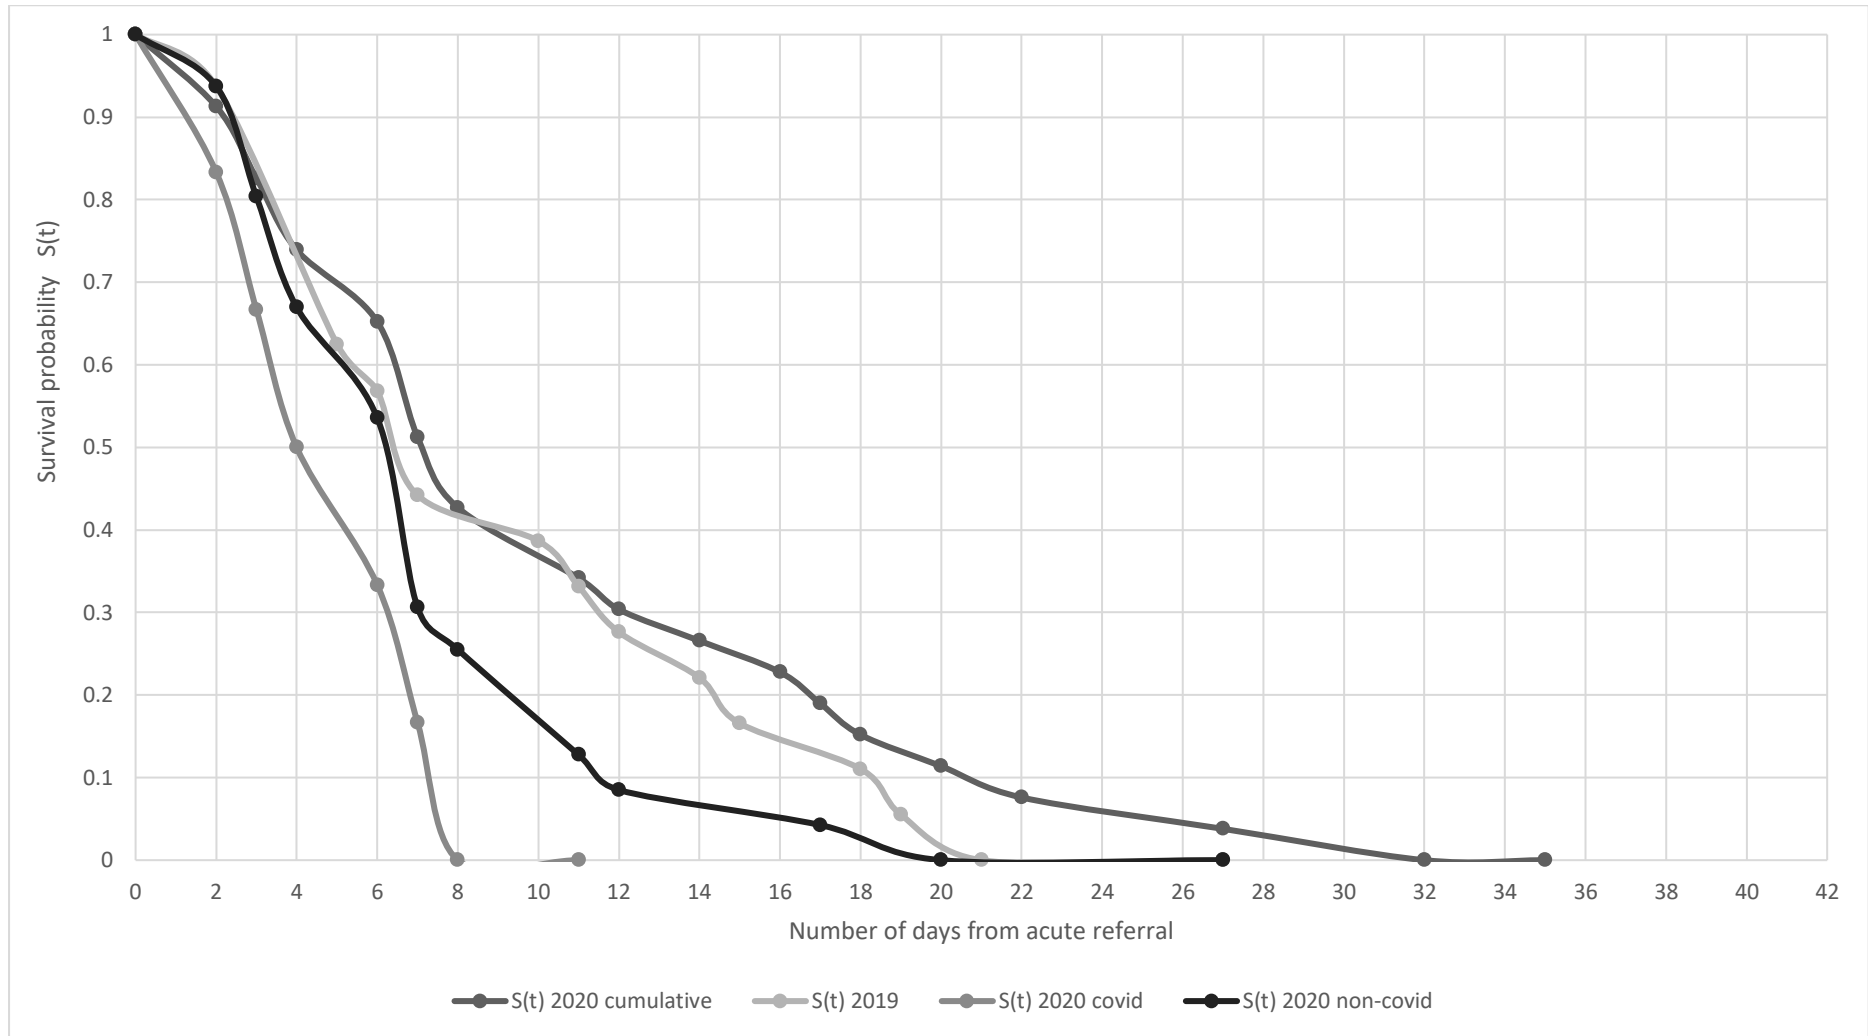

Figure 12: Six-week Kaplan-Meier survival probability analysis for mortalities between pre- and post-COVID for those undergoing surgery

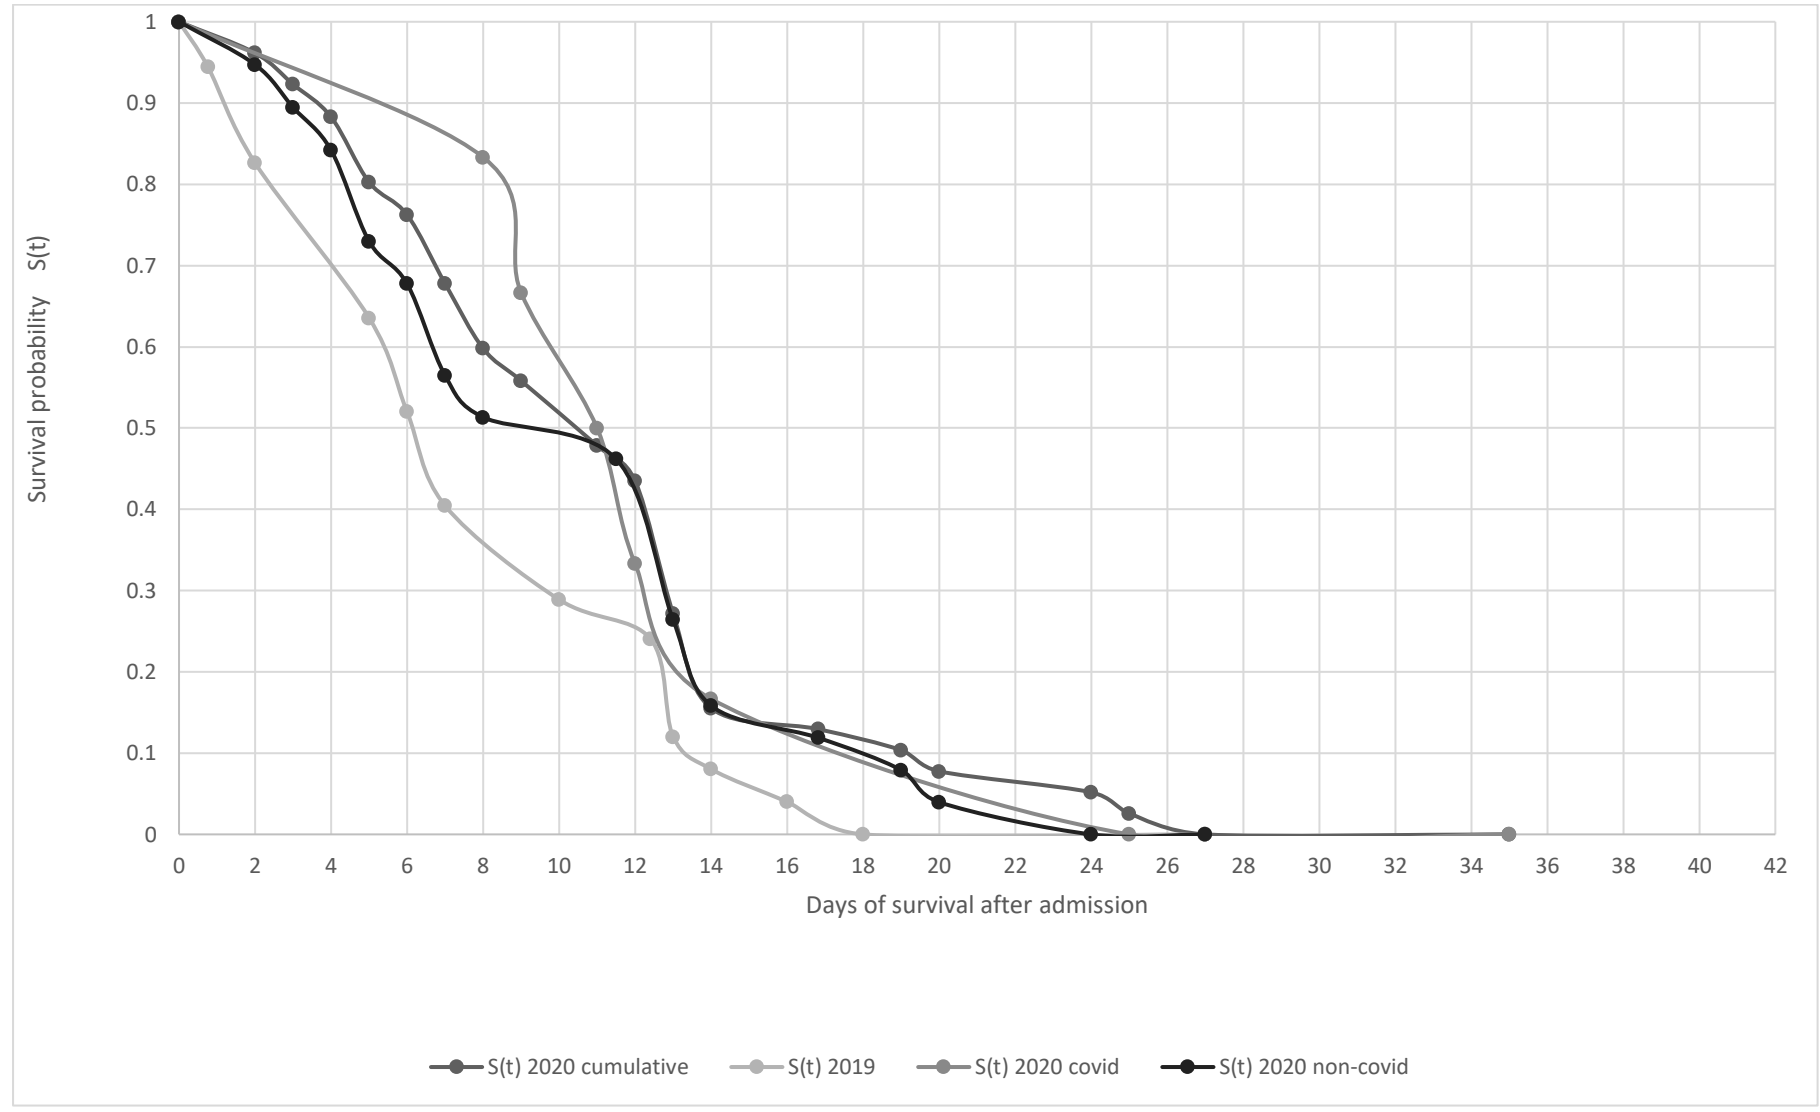

STROBE Statement—Checklist of items that should be included in reports of *cohort studies*

|                              | Item No | Recommendation                                                                                                                                                                                                                                                                                                         | Page No                                    |
|------------------------------|---------|------------------------------------------------------------------------------------------------------------------------------------------------------------------------------------------------------------------------------------------------------------------------------------------------------------------------|--------------------------------------------|
| <b>Title and abstract</b>    | 1       | (a) Indicate the study's design with a commonly used term in the title or the abstract<br>(b) Provide in the abstract an informative and balanced summary of what was done and what was found                                                                                                                          | 1, 7-8<br>8                                |
| <b>Introduction</b>          |         |                                                                                                                                                                                                                                                                                                                        |                                            |
| Background/rationale         | 2       | Explain the scientific background and rationale for the investigation being reported                                                                                                                                                                                                                                   | 9-10                                       |
| Objectives                   | 3       | State specific objectives, including any prespecified hypotheses                                                                                                                                                                                                                                                       | 10                                         |
| <b>Methods</b>               |         |                                                                                                                                                                                                                                                                                                                        |                                            |
| Study design                 | 4       | Present key elements of study design early in the paper                                                                                                                                                                                                                                                                | 11                                         |
| Setting                      | 5       | Describe the setting, locations, and relevant dates, including periods of recruitment, exposure, follow-up, and data collection                                                                                                                                                                                        | 11-12                                      |
| Participants                 | 6       | (a) Give the eligibility criteria, and the sources and methods of selection of participants. Describe methods of follow-up<br>(b) For matched studies, give matching criteria and number of exposed and unexposed                                                                                                      | 12<br>12                                   |
| Variables                    | 7       | Clearly define all outcomes, exposures, predictors, potential confounders, and effect modifiers. Give diagnostic criteria, if applicable                                                                                                                                                                               | 11-13<br>Table 1                           |
| Data sources/<br>measurement | 8*      | For each variable of interest, give sources of data and details of methods of assessment (measurement). Describe comparability of assessment methods if there is more than one group                                                                                                                                   | 11,14                                      |
| Bias                         | 9       | Describe any efforts to address potential sources of bias                                                                                                                                                                                                                                                              | 11-12                                      |
| Study size                   | 10      | Explain how the study size was arrived at                                                                                                                                                                                                                                                                              | 11-12                                      |
| Quantitative variables       | 11      | Explain how quantitative variables were handled in the analyses. If applicable, describe which groupings were chosen and why                                                                                                                                                                                           | 11-12,<br>14                               |
| Statistical methods          | 12      | (a) Describe all statistical methods, including those used to control for confounding<br>(b) Describe any methods used to examine subgroups and interactions<br>(c) Explain how missing data were addressed<br>(d) If applicable, explain how loss to follow-up was addressed<br>(e) Describe any sensitivity analyses | 14<br>14<br>29<br>n/a<br>n/a               |
| <b>Results</b>               |         |                                                                                                                                                                                                                                                                                                                        |                                            |
| Participants                 | 13*     | (a) Report numbers of individuals at each stage of study—eg numbers potentially eligible, examined for eligibility, confirmed eligible, included in the study, completing follow-up, and analysed<br>(b) Give reasons for non-participation at each stage<br>(c) Consider use of a flow diagram                        | 16<br>Table 2, Figs 1-3<br>16<br>n/a       |
| Descriptive data             | 14*     | (a) Give characteristics of study participants (eg demographic, clinical, social) and information on exposures and potential confounders<br>(b) Indicate number of participants with missing data for each variable of interest<br>(c) Summarise follow-up time (eg, average and total amount)                         | 16<br>Table 2, Figs 1-3<br>Figs 1-4<br>n/a |

|    |                          |     |                                                                                                                                                                                                              |                             |
|----|--------------------------|-----|--------------------------------------------------------------------------------------------------------------------------------------------------------------------------------------------------------------|-----------------------------|
| 1  | Outcome data             | 15* | Report numbers of outcome events or summary measures over time                                                                                                                                               | Tables 2-4, Figures 1-12    |
| 2  |                          |     |                                                                                                                                                                                                              |                             |
| 3  |                          |     |                                                                                                                                                                                                              |                             |
| 4  |                          |     |                                                                                                                                                                                                              |                             |
| 5  |                          |     |                                                                                                                                                                                                              |                             |
| 6  | Main results             | 16  | (a) Give unadjusted estimates and, if applicable, confounder-adjusted estimates and their precision (eg, 95% confidence interval). Make clear which confounders were adjusted for and why they were included | 9-15, Tables 2-4, Figs 1-12 |
| 7  |                          |     | (b) Report category boundaries when continuous variables were categorized                                                                                                                                    | n/a                         |
| 8  |                          |     | (c) If relevant, consider translating estimates of relative risk into absolute risk for a meaningful time period                                                                                             | Table 3                     |
| 9  |                          |     |                                                                                                                                                                                                              |                             |
| 10 |                          |     |                                                                                                                                                                                                              |                             |
| 11 |                          |     |                                                                                                                                                                                                              |                             |
| 12 |                          |     |                                                                                                                                                                                                              |                             |
| 13 |                          |     |                                                                                                                                                                                                              |                             |
| 14 |                          |     |                                                                                                                                                                                                              |                             |
| 15 | Other analyses           | 17  | Report other analyses done—eg analyses of subgroups and interactions, and sensitivity analyses                                                                                                               | 20-21 Table 4 Figs 8-12     |
| 16 |                          |     |                                                                                                                                                                                                              |                             |
| 17 |                          |     |                                                                                                                                                                                                              |                             |
| 18 |                          |     |                                                                                                                                                                                                              |                             |
| 19 |                          |     |                                                                                                                                                                                                              |                             |
| 20 | <b>Discussion</b>        |     |                                                                                                                                                                                                              |                             |
| 21 | Key results              | 18  | Summarise key results with reference to study objectives                                                                                                                                                     | 22-29                       |
| 22 |                          |     |                                                                                                                                                                                                              |                             |
| 23 | Limitations              | 19  | Discuss limitations of the study, taking into account sources of potential bias or imprecision. Discuss both direction and magnitude of any potential bias                                                   | 29-30                       |
| 24 |                          |     |                                                                                                                                                                                                              |                             |
| 25 | Interpretation           | 20  | Give a cautious overall interpretation of results considering objectives, limitations, multiplicity of analyses, results from similar studies, and other relevant evidence                                   | 22-29                       |
| 26 |                          |     |                                                                                                                                                                                                              |                             |
| 27 |                          |     |                                                                                                                                                                                                              |                             |
| 28 | Generalisability         | 21  | Discuss the generalisability (external validity) of the study results                                                                                                                                        | 22-29                       |
| 29 |                          |     |                                                                                                                                                                                                              |                             |
| 30 | <b>Other information</b> |     |                                                                                                                                                                                                              |                             |
| 31 | Funding                  | 22  | Give the source of funding and the role of the funders for the present study and, if applicable, for the original study on which the present article is based                                                | 15                          |
| 32 |                          |     |                                                                                                                                                                                                              |                             |

33  
34 \*Give information separately for exposed and unexposed groups.

35  
36  
37 **Note:** An Explanation and Elaboration article discusses each checklist item and gives methodological background and published examples of transparent reporting. Information on the STROBE Initiative is available at <http://www.strobe-statement.org>.

38  
39  
40  
41  
42  
43  
44  
45  
46  
47  
48  
49  
50  
51  
52  
53  
54  
55  
56  
57  
58  
59  
60

# BMJ Open

**The impact of COVID-19 on acute trauma and orthopaedic referrals and surgery in the UK during the first wave of the pandemic: a multicentre observational study from the COVID-Emergency Related Trauma and orthopaedics (COVERT) Collaborative**

|                                 |                                                                                                                                                                                                                                                                                              |
|---------------------------------|----------------------------------------------------------------------------------------------------------------------------------------------------------------------------------------------------------------------------------------------------------------------------------------------|
| Journal:                        | <i>BMJ Open</i>                                                                                                                                                                                                                                                                              |
| Manuscript ID                   | bmjopen-2021-054919.R2                                                                                                                                                                                                                                                                       |
| Article Type:                   | Original research                                                                                                                                                                                                                                                                            |
| Date Submitted by the Author:   | 13-Dec-2021                                                                                                                                                                                                                                                                                  |
| Complete List of Authors:       | Sugand, Kapil; Imperial College London, MSk Lab<br>Aframian, Arash; Imperial College London, MSk Lab<br>Park, Chang; Imperial College London, Trauma and orthopaedics<br>Sarraf , Khaled; Imperial College London, Trauma and Orthopaedics<br>Collaborative, COVERT; Imperial College London |
| <b>Primary Subject Heading</b>: | Surgery                                                                                                                                                                                                                                                                                      |
| Secondary Subject Heading:      | Emergency medicine, Epidemiology, Surgery, Medical management, Health services research                                                                                                                                                                                                      |
| Keywords:                       | COVID-19, TRAUMA MANAGEMENT, ORTHOPAEDIC & TRAUMA SURGERY, EPIDEMIOLOGY                                                                                                                                                                                                                      |
|                                 |                                                                                                                                                                                                                                                                                              |

SCHOLARONE™  
Manuscripts



I, the Submitting Author has the right to grant and does grant on behalf of all authors of the Work (as defined in the below author licence), an exclusive licence and/or a non-exclusive licence for contributions from authors who are: i) UK Crown employees; ii) where BMJ has agreed a CC-BY licence shall apply, and/or iii) in accordance with the terms applicable for US Federal Government officers or employees acting as part of their official duties; on a worldwide, perpetual, irrevocable, royalty-free basis to BMJ Publishing Group Ltd ("BMJ") its licensees and where the relevant Journal is co-owned by BMJ to the co-owners of the Journal, to publish the Work in this journal and any other BMJ products and to exploit all rights, as set out in our [licence](#).

The Submitting Author accepts and understands that any supply made under these terms is made by BMJ to the Submitting Author unless you are acting as an employee on behalf of your employer or a postgraduate student of an affiliated institution which is paying any applicable article publishing charge ("APC") for Open Access articles. Where the Submitting Author wishes to make the Work available on an Open Access basis (and intends to pay the relevant APC), the terms of reuse of such Open Access shall be governed by a Creative Commons licence – details of these licences and which [Creative Commons](#) licence will apply to this Work are set out in our licence referred to above.

Other than as permitted in any relevant BMJ Author's Self Archiving Policies, I confirm this Work has not been accepted for publication elsewhere, is not being considered for publication elsewhere and does not duplicate material already published. I confirm all authors consent to publication of this Work and authorise the granting of this licence.

1  
2  
3  
4 1 **The impact of COVID-19 on acute trauma and orthopaedic referrals and surgery in the UK**  
5  
6  
7 2 **during the first wave of the pandemic: a multicentre observational study from the COVid-**  
8  
9  
10 3 **Emergency Related Trauma and orthopaedics (COVERT) Collaborative**

11  
12  
13  
14 4  
15  
16  
17 5 Kapil Sugand, Arash Aframian, Chang Park, Khaled M Sarraf, COVERT Collaborative

18  
19  
20 6  
21  
22  
23  
24 7 Department of Trauma and Orthopaedics, Imperial College Healthcare NHS Trust, London,  
25  
26  
27 8 UK

28  
29  
30 9  
31  
32  
33  
34 10 *Corresponding author:*

35  
36  
37 11 Kapil Sugand

38  
39  
40 12 Dept T&O, St Mary's Hospital, Praed St, London, W2 1NY

41  
42  
43  
44 13 E: [ks704@ic.ac.uk](mailto:ks704@ic.ac.uk)

45  
46  
47 14 T: 07773642813

48  
49  
50 15

51  
52  
53 16 **Keywords:** COVID-19; orthopaedic trauma; UK multi-centre; pandemic wave; mortality

54  
55  
56 17

57  
58  
59 18 **Word count: 4000 words**

1  
2  
3 19 **Abstract**  
4 20

6 21 **Objective:** This is the first British multi-centre study observing the impact of the COVID-19  
7  
8  
9 22 pandemic on orthopaedic trauma with respect to referrals, operative caseload and mortality  
10  
11 23 during its peak.

13 24 **Design:** A longitudinal, multi-centre, retrospective, observational, cohort study was  
14  
15  
16 25 conducted during the peak 6 weeks of the first wave from March 17, 2020 compared to the  
17  
18 26 same period in 2019.

20 27 **Setting:** Hospitals from six major urban cities were recruited around the UK, including  
21  
22  
23 28 London.

25 29 **Participants:** A total of 4840 clinical encounters were initially recorded. 4668 clinical  
26  
27 30 encounters were analysed post-exclusion.

29 31 **Primary and secondary outcome measures:** Primary outcomes included the number of  
30  
31 32 acute trauma referrals and those undergoing operative intervention, mortality rates, and the  
32  
33 33 proportion of patients contracting COVID-19. Secondary outcomes consisted of the  
34  
35 34 mechanism of injury, type of operative intervention and proportion of aerosolising-generating  
36  
37 35 anaesthesia utilised.

40 36 **Results:** During the COVID-19 period there was a 34% reduction in acute orthopaedic  
41  
42 37 trauma referrals compared to 2019 (1792 down to 1183 referrals), and a 29.5% reduction in  
43  
44 38 surgical interventions (993 down to 700 operations). The mortality rate was more than  
45  
46 39 doubled for both risk and odds ratios during the COVID period for all referrals (1.3% vs  
47  
48 40 3.8%,  $p=0.0005$ ) and for those undergoing operative intervention (2.2% vs 4.9%,  $p=0.004$ ).  
49  
50 41 Moreover, mortality due to COVID-related complications (versus non-COVID causes) had  
51  
52 42 greater odds by a factor of at least 20 times. For the operative cohort during COVID, there  
53  
54 43 was an increase in odds of aerosolising-generating anaesthesia (including those with  
55  
56  
57  
58  
59  
60



1  
2  
3 44 superimposed regional blocks) by three-quarters, as well as doubled odds of a consultant  
4  
5 45 acting as the primary surgeon.  
6  
7  
8 46

9  
10 47 **Conclusion:** Although there was a reduction of acute trauma referrals and those undergoing  
11  
12 48 operative intervention, the mortality rate still more than doubled in odds during the peak of  
13  
14 49 the pandemic compared to the same time interval one year previous.  
15  
16

17 50  
18  
19 51 **Keywords:** COVID-19; orthopaedic trauma; UK multi-centre; pandemic wave; mortality  
20  
21 52

22  
23  
24 53 **Strengths and limitations of this study**  
25

- 26  
27 54
- 28 • This was the first representative observational study of the UK looking into the  
29  
30  
31 55 impact of COVID-19 pandemic on general trauma and orthopaedic surgical specialty.  
32  
33  
34 56
  - 35 • There is a valid comparison between two timeframes, exactly one year apart to  
36  
37  
38 57 represent pre-COVID and during COVID.  
39  
40  
41 58
  - 42 • Other studies thus far have only shed light on local scales or cross-speciality within a  
43  
44 59 shorter timeframe than this study and not necessarily commenting on mortality rates  
45  
46  
47  
48 60 like this study.  
49  
50  
51 61
  - 52 • Weaknesses included loss of data points which have been accounted for in the tables  
53  
54 62 (i.e. labelled as unknown) which did not affect the final analysis of data points.  
55  
56  
57  
58  
59  
60

1  
2  
3  
4  
5  
6  
7  
8  
9  
10  
11  
12  
13  
14  
15  
16  
17  
18  
19  
20  
21  
22  
23  
24  
25  
26  
27  
28  
29  
30  
31  
32  
33  
34  
35  
36  
37  
38  
39  
40  
41  
42  
43  
44  
45  
46  
47  
48  
49  
50  
51  
52  
53  
54  
55  
56  
57  
58  
59  
60

- 63 • Operations conducted outside the specific study periods will not account for all those  
64 operations required such as for hip fractures.

For peer review only

## 65 **Introduction**

### 67 *The Global Impact of COVID-19*

68 The COVID-19 pandemic will be remembered as one of the most unprecedented global  
69 health crises in modern history. With over 5 million deaths and over 263 million recorded  
70 cases globally, the pandemic has had a permanent impact on healthcare at the time of article  
71 submission.<sup>1</sup> The viral outbreak was first reported in December 2019 with the first patient  
72 hospitalised in the city of Wuhan, China.<sup>2</sup> By mid-March the outbreak affected over 190  
73 countries with over 450,000 cases and over 20,000 deaths, thus being declared a pandemic  
74 and a global public health emergency by the World Health Organization.<sup>3</sup> On January 24<sup>th</sup>  
75 2020 Europe reported its first case followed by a case in the United Kingdom (UK) 5 days  
76 later.<sup>4</sup>

### 78 *The British Response to the pandemic*

79 The English government responded by implementing social distancing measures on the 17<sup>th</sup>  
80 March 2020 in an attempt to reduce the rate of transmission and therefore the demands on the  
81 National Health Service (NHS).<sup>5</sup> This was followed a week later by more stringent measures,  
82 commonly referred to as a societal 'lockdown'.<sup>6</sup> As of the 23<sup>rd</sup> March 2020, all members of  
83 the public were required to stay at home. The NHS has also been deeply affected by the strain  
84 imposed by the virus as the healthcare infrastructure has had to evolve to cope with the  
85 overwhelming and unexpected pressures on staff, resources and finances. There has been a  
86 complete renovation of emergency medicine and orthopaedic services to manage  
87 musculoskeletal disease and trauma. In response to the NHS emergency declaration,<sup>7</sup> the  
88 Royal Colleges of Surgeons<sup>8</sup> and the British Orthopaedic Association<sup>9</sup> both issued statements  
89 and guidelines for delivering emergency trauma and orthopaedic care during the COVID-19  
90 outbreak. The lockdown to limit the spread of the virus has had an unforeseen effect in

1  
2  
3 91 significantly reducing the acute trauma workload described in several single centre studies.<sup>10-</sup>  
4

5 92 <sup>13</sup> There has however not been a British multi-centre reflection of the impact of the COVID-  
6

7  
8 93 19 pandemic on the orthopaedic workload and its potential impact on the mortality.  
9

10 94  
11

12  
13 95 **Aim**  
14

15 96 To observe the impact of COVID-19 on trauma and orthopaedic acute referrals, operative  
16

17 97 casemix and mortality rates during the peak 6 weeks of the first wave of the pandemic  
18

19 98 compared to the same time interval in 2019.  
20  
21  
22

23 99  
24

25  
26 100 **Alternative hypothesis**  
27

28 101 When comparing both years, there would be a difference in the prevalence of acute  
29

30 102 orthopaedic referrals, orthopaedic trauma casemix and aerosol-generating anaesthetic  
31

32 103 procedures due to social distancing/lockdown. Mortality rates and survival probabilities were  
33

34 104 also hypothesised to differ due to the first COVID-19 outbreak.  
35  
36  
37

38 105  
39  
40  
41  
42  
43  
44  
45  
46  
47  
48  
49  
50  
51  
52  
53  
54  
55  
56  
57  
58  
59  
60

1  
2  
3 **106 Methods**  
4  
5

6 *107 Study design:* This is the first multi-centre longitudinal observational study observing patients  
7  
8 *108* who were acutely referred to the trauma and orthopaedic departments as well as those  
9  
10 *109* operated on within the same 6-week interval comparing 2019 to 2020.  
11  
12

13 *110*  
14  
15  
16 *111 Setting:* Seven principal hospitals contributed data from 6 major urban cities including  
17  
18 *112* London, Gateshead, Middlesbrough, Dartford, Newport, and Reading.  
19  
20

21 *113*  
22  
23  
24 *114 Patient sampling:* All acute referrals, operative notes, inpatient medical records and discharge  
25  
26 *115* summaries were accessed using electronic medical system at each contributing hospital trust.  
27  
28

29 *116*  
30  
31  
32 *117 Study period:* The 6-week study period was from the start of social distancing on Tuesday  
33  
34 *118* 17<sup>th</sup> March 2020 to Tuesday 28<sup>th</sup> April 2020 which encompassed the national lockdown  
35  
36 *119* measures instigated on the 23<sup>rd</sup> March 2020. This period was considered the peak 6 weeks of  
37  
38 *120* the epidemic in the UK as outlined by the recorded mortality rates and R-values published by  
39  
40 *121* the Office of National Statistics.<sup>14</sup> This time period was compared to the same 6-week  
41  
42 *122* interval from Tuesday 19<sup>th</sup> March to Tuesday 30<sup>th</sup> April 2019 (i.e. prior to any COVID-19  
43  
44 *123* related measures) to compare the impact of the pandemic one year apart.  
45  
46  
47

48 *124*  
49  
50  
51 *125 Outcomes/objectives:* Primary outcomes included the number of acute trauma referrals and  
52  
53 *126* those undergoing operative intervention, post-operative complications, mortality rates, and  
54  
55 *127* the proportion of patients contracting COVID-19. Secondary outcomes consisted of the  
56  
57  
58  
59  
60

1  
2  
3 128 mechanism of injury, type of operative intervention and proportion of aerosolising-generating  
4  
5 129 anaesthesia utilised.

6  
7  
8 130

9  
10  
11 131 *Inclusion criteria:* All acute orthopaedic trauma referrals presenting to the Emergency  
12  
13 132 Department during the intervals one year apart were included. All orthopaedic trauma cases  
14  
15 133 that required an operation, including those from acute orthopaedic trauma referrals, within  
16  
17 134 the intervals one year apart. Those patients listed for an operation due to orthopaedic trauma  
18  
19 135 prior to time period of data collection were included in the final analysis. We adhered to  
20  
21 136 STROBE guidelines for observational studies.

22  
23  
24  
25 137

26  
27  
28 138 *Exclusion criteria:* Any cases being referred internally from other specialties for trauma and  
29  
30 139 orthopaedic advice and input, as well as referrals from any external centre asking for tertiary  
31  
32 140 advice were excluded from further analysis. Any patients with post-operative complications  
33  
34 141 arising from the period prior to the data collection were excluded. For operative trauma cases,  
35  
36 142 those undergoing spinal procedures were excluded as these are jointly treated by  
37  
38 143 Neurosurgery in most hospitals. All non-urgent semi-elective procedures were excluded from  
39  
40 144 analysis as well, as they would inaccurately assess the impact of any social distancing  
41  
42 145 measures on the trauma workload. Routine elective orthopaedic cases were excluded.

43  
44  
45  
46  
47 146

48  
49  
50 147 *Data points:* Demographics including age, sex and ASA grades were recorded for all  
51  
52 148 patients. Injury characteristics were recorded, including the anatomical location and if the  
53  
54 149 injury was open or closed. The mechanism of injury was categorised and whether the patient  
55  
56 150 was referred as a trauma call. The nature of the operative procedures and the anaesthetic  
57  
58 151 techniques were recorded. Patients undergoing multiple procedures were recorded for every  
59  
60

152 episode where they were taken to theatre. 6-week mortality rate was recorded as well as the  
 153 COVID-19 status of any symptomatic patients or suspected cases. Data points were divided  
 154 into acute referrals and operative casemix as seen in table 1.

155

156 *Table 1: data points for acute referrals and operative casemix*

|                     |                                        |                                                |                               |
|---------------------|----------------------------------------|------------------------------------------------|-------------------------------|
| Age (years)         | Gender (Male / female by birth)        | ASA (1-5)                                      | Date of injury / presentation |
| Injury              | Mechanism of injury                    | Open Vs Closed fracture                        | Trauma Call (Yes / No)        |
| Operative procedure | Anaesthetic Technique (AGP vs non-AGP) | Seniority of Surgeon (Consultants vs trainees) | Comorbidities                 |
| 6-week mortality    | Post-op complications                  | Surgery time since admission (hours)           | COVID status (from PCR swabs) |

157

- 158 • *Anaesthetic techniques:* This was divided into anaesthetic aerosolising-generating  
 159 procedures (AGP) which consisted of any intubation (including laryngeal mask  
 160 airway and endotracheal intubation) for a general anaesthetic. All other anaesthetic  
 161 techniques including regional and local anaesthetics were deemed as non-AGPs.
- 162 • *COVID status:* At the time, COVID was being diagnosed with polymerase chain  
 163 reaction (PCR) from nasal and oropharyngeal swabs with a duration of 1 to 4 days  
 164 where the sample was tested both locally in the hospital lab as well as corroborated  
 165 with national lab testing to reduce risk of unequivocacy. Groups of patients were  
 166 divided into either not swabbed (due to being asymptomatic) or swabbed due to  
 167 presence of documented symptoms which yielded either negative or positive results.

168

169 *Statistical analysis:* All the data were recorded, anonymised and verified by four members of  
170 the study group for their accuracy. The data were processed using Microsoft Excel  
171 (Microsoft, Washington, USA). Shapiro-Wilk test indicated a normal distribution for age and  
172 days to discharge from hospital; hence, the mean ( $\pm$  standard deviation; 95% CI) were  
173 calculated for both. ASA did not follow normality and was analysed using median ( $\pm$ median  
174 absolute deviation [MAD]) and interquartile range (IQR). Both prevalence or risk and odds  
175 ratios were calculated as well as a Fisher's exact test for statistical significance for  
176 categorical data, defined as  $p \leq 0.05$ . Percentages and confidence intervals were rounded off  
177 to one decimal place.

178

179 *The collaborative:* The COVID Emergency Related Trauma and orthopaedics (COVERT)  
180 Collaborative was founded at Imperial College Healthcare NHS Trust. It is currently a  
181 member of the COVID Research Group and it has been endorsed by the Royal College of  
182 Surgeons of England and Imperial College Healthcare NHS Trust.

183

184 *Patient and Public Involvement:* Patients and the public were not involved in the study  
185 design, recruitment or conduct.



## 186 Results

187 A total of 4840 clinical encounters took place between the study periods. A total of 172  
 188 spinal operations and presentations were excluded from the final analysis. Table 2 outlined  
 189 demographic data. During the COVID-19 period there was a 34% reduction in acute  
 190 orthopaedic trauma referrals compared to 2019 (1792 down to 1183 referrals), and 29.5% less  
 191 surgical interventions (993 down to 700 operations). Figures 1-3 have categorised these  
 192 clinical encounters into types and mechanisms of injury for both acute referrals and operative  
 193 cases between both years respectively.

194

195 *Table 2: Demographic data of pre- and post-COVID*

|                        |                         | Pre-COVID (2019) |       | COVID (2020)  |       |
|------------------------|-------------------------|------------------|-------|---------------|-------|
|                        | <b>Total</b>            | <b>1792</b>      |       | <b>1183</b>   |       |
| <b>Acute referrals</b> | <i>Male</i>             | 935              | 52.2% | 560           | 47.3% |
|                        | <i>Female</i>           | 857              | 47.8% | 623           | 52.7% |
|                        | <i>Mean Age ± SD</i>    | 52.2 ± 27.9      |       | 55.8 ± 27.9   |       |
|                        | <i>(95% CI)</i>         | (50.9 - 53.5)    |       | (54.3 - 57.4) |       |
| <b>Operative cases</b> | <b>Total</b>            | <b>993</b>       |       | <b>700</b>    |       |
|                        | <i>Male</i>             | 499              | 50.3% | 320           | 45.7% |
|                        | <i>Female</i>           | 494              | 49.7% | 380           | 54.3% |
|                        | <i>Mean Age ± SD</i>    | 51.7 ± 28.1      |       | 57.7 ± 26.7   |       |
|                        | <i>(95% CI)</i>         | (50 - 53.5)      |       | (55.7 - 59.6) |       |
|                        | <i>Median ASA ± MAD</i> | 2 ± 1            |       | 2 ± 1         |       |
|                        | <i>(IQR)</i>            | (2)              |       | (2)           |       |

196

197 *Figure 1: Types and mechanisms of injuries for acute referrals*

198 *Figure 2: Types and mechanisms of injuries for operative cases*

199 *Figure 3: operative and anaesthetic techniques compared between pre- and post-COVID*

200

201 **COVID status**

202 COVID status for both acute referrals and operative casemix including results in all  
 203 mortalities were demonstrated in figure 4. Mortalities with positive swab results were  
 204 confirmed prior to the event of death within 6-weeks post-presentation. Approximately three-  
 205 quarters were not tested and a fifth had negative results. 0.9% of the acute referrals resulted  
 206 in deaths and 28.9% of those mortalities tested positive for COVID. Furthermore, post-  
 207 operative mortalities represented 1.6% of the entire operative casemix, and 32.4% of those  
 208 mortalities had a confirmed positive COVID-19 diagnosis prior to their death.

209

210 *Figure 4: COVID status for acute referrals and operative cases as a measure of proportions*

211

212 **Risk (or prevalence) and odds ratios**

213 *Table 3: Risk (or prevalence) and odds ratios for acute referrals and operative caseloads.*

214 *Comparisons are made between COVID period against the pre-COVID period. Value >1*

215 *indicated greater odds or risk during the COVID period.*

|                                                                  | Acute referrals |      |         | Operative caseload |      |         |
|------------------------------------------------------------------|-----------------|------|---------|--------------------|------|---------|
|                                                                  | RR              | OR   | p-value | RR                 | OR   | p-value |
| Mortality                                                        | 2.50            | 2.55 | 0.0005  | 2.19               | 2.25 | 0.004   |
| Mortality due to COVID-related complications vs non-COVID causes | 14.2            | 19.7 | 0.004   | 15.1               | 22.0 | 0.004   |

|                                  |                                                    |      |      |         |      |      |         |
|----------------------------------|----------------------------------------------------|------|------|---------|------|------|---------|
| <b>Morbidity &amp; Mortality</b> | Peri-/post-operative complications including COVID |      |      |         | 5.88 | 6.09 | 0.00001 |
|                                  | Peri-/post-operative complications excluding COVID |      |      |         | 3.65 | 3.72 | 0.003   |
|                                  | Peri-/post-operative COVID positive testing        |      |      |         | 32.6 | 23.4 | 0.0009  |
| <b>Anaesthetic technique</b>     | General anaesthetic only                           |      |      |         | 1.22 | 1.61 | 0.00001 |
|                                  | General anaesthetic ± block                        |      |      |         | 1.23 | 1.75 | 0.00001 |
| <b>Consultant involvement</b>    | Consultant-led operation                           |      |      |         | 1.36 | 2.08 | 0.00001 |
| <b>Operation technique</b>       | Open reduction + internal fixation                 |      |      |         | 0.81 | 0.74 | 0.007   |
|                                  | Dynamic hip screw                                  |      |      |         | 2.02 | 2.11 | 0.00001 |
|                                  | Removal of metal/foreign body                      |      |      |         | 0.24 | 0.23 | 0.003   |
| <b>Mechanism of injury</b>       | Road traffic accident                              | 0.58 | 0.56 | 0.001   | 0.45 | 0.43 | 0.00001 |
|                                  | Fall (<1.5m)                                       | 1.19 | 1.54 | 0.00001 | 1.17 | 1.49 | 0.0001  |
|                                  | Sporting injury                                    | 0.63 | 0.60 | 0.0005  | 0.64 | 0.61 | 0.003   |
|                                  | Infection                                          | 0.69 | 0.66 | 0.001   | 1.70 | 1.77 | 0.005   |
|                                  | Trauma call                                        |      |      |         | 0.55 | 0.52 | 0.0005  |
| <b>Type of injury</b>            | Neck of femur (NOF) fracture                       | 1.44 | 1.57 | 0.00001 | 1.51 | 1.79 | 0.00001 |
|                                  | Lower limb (excl. NOF)                             | 0.89 | 0.84 | 0.04    | 0.74 | 0.65 | 0.0001  |
| <b>Gender</b>                    | Male                                               | 0.91 | 0.82 | 0.01    |      |      |         |

1  
2  
3 217 Table 3 outlined the risk [RR] (or prevalence [PR]) and odds ratios [OR] alongside their 95%  
4  
5 218 confidence intervals and statistical significance. The risk ratio is synonymous with the  
6  
7 219 prevalence ratio. Only those factors that were statistically significant within the acute  
8  
9 220 referrals and operative caseloads were included. There were trends demonstrating increase in  
10  
11 221 mortality rates, use of anaesthetic AGPs, Consultant-led operations, hip fracture surgery and  
12  
13 222 falls; but a decrease in other lower limb operations, open reduction and internal fixation,  
14  
15 223 removal of metalwork and foreign bodies, road traffic accidents, sporting injuries and  
16  
17 224 infection.  
18  
19  
20  
21  
22  
23  
24

## 25 226 **Mortality**

26  
27 227 Table 3 indicated that the 6-week mortality rate more than doubled significantly for both risk  
28  
29 228 (RR=2.19-2.50) and odds (OR=2.25-2.55) ratios during the COVID period. COVID-related  
30  
31 229 complications were still responsible for increasing the odds of mortality by 20 to 22 times  
32  
33 230 within all mortalities from both acute referrals and operative cases (as compared to non-  
34  
35 231 COVID causes for all mortality in the year 2019). Table 4 confirmed that the mean age of  
36  
37 232 mortalities across the board were in the elderly patient population with a high median ASA  
38  
39 233 grade. Males were consistently in the minority, while neck of femur fracture was the modal  
40  
41 234 diagnosis due to falls and persistently in the majority, followed by lower limb injuries  
42  
43 235 (figures 5-6). At least 82% of operations were related to neck of femur fractures in which half  
44  
45 236 of all operations during the COVID period involved anaesthetic AGPs. Whereas the  
46  
47 237 mortalities from pre-COVID operations did not have Consultant-led (as primary surgeon)  
48  
49 238 surgery, that increased to three-fifths of all operations conducted during the COVID period  
50  
51 239 (figure 7).  
52  
53  
54  
55  
56  
57

58 240

59 241 *Table 4: Patient demographics, date of injuries, and time to mortality*

60

|                                                        | <i>Acute referrals</i>       |     |                                          |     | <i>Operative casemix</i>    |     |                                          |     |
|--------------------------------------------------------|------------------------------|-----|------------------------------------------|-----|-----------------------------|-----|------------------------------------------|-----|
|                                                        | 2019                         |     | 2020                                     |     | 2019                        |     | 2020                                     |     |
|                                                        | (n=23)                       |     | (n=38)                                   |     | (n=22)                      |     | (n=34)                                   |     |
| Mortality                                              | 1.3%                         |     | 3.2%                                     |     | 2.2%                        |     | 4.9%                                     |     |
| Mortality with COVID positive PCR result               |                              |     | 0.9% (total)<br>28.0% (mortality cohort) |     |                             |     | 1.6% (total)<br>32.9% (mortality cohort) |     |
| Post-op morbidity                                      |                              |     |                                          |     | 0.7%                        |     | 4.1%                                     |     |
| Age (years; mean±SD; 95% CI)                           | 80.2 ± 16.4<br>(73.2 - 87.2) |     | 77 ± 23<br>(67 - 88)                     |     | 83.9±12.2<br>(78.7 - 89.1)  |     | 84.0±13.5<br>(79.4 - 88.5)               |     |
| Male                                                   | 9                            | 39% | 16                                       | 42% | 8                           | 36% | 15                                       | 44% |
| ASA (median±MAD; IQR)                                  |                              |     |                                          |     | 3 ± 0<br>(1)                |     | 3 ± 0<br>(0)                             |     |
| Date of injury (mean days±SD; 95%CI)                   | 6/4 ± 11<br>(1/4 - 10/4)     |     | 31/3 ± 12<br>(26/3 - 5/4)                |     | 6/4 ± 12<br>(1/4 - 11/4)    |     | 30/3 ± 14<br>(25/3 - 4/4)                |     |
| Time from admission to mortality (mean days±SD; 95%CI) | 10.3 ± 7.5<br>(7.1 - 13.5)   |     | 11 ± 10<br>(7 - 15)                      |     | 14.3 ± 10.4<br>(9.8 - 18.7) |     | 13.8 ± 10.4<br>(10.2 - 17.3)             |     |

Figure 5: types and mechanism of injury for mortalities in acute referral cohorts

Figure 6: types and mechanism of injury for mortalities in operative casemix cohorts

Figure 7: Surgical and anaesthetic techniques utilised in mortalities as a means of proportions

### Sub-group analysis for neck of femur fracture

A subgroup analysis of hip fractures was conducted due to its recognised risk of mortality within orthopaedic trauma. Those who were operated on in 2020, 20.2% tested positive for COVID, 47.3% tested negative and the remaining 32.4% were not tested due to being asymptomatic. Furthermore, 82.3% of all mortalities in 2020 sustained a neck of femur

1  
2  
3 252 fracture in which only 35.7% of this cohort had a positive swab result, 21.4% with negative  
4  
5 253 swab results and the remaining 42.9% were not swabbed due to being asymptomatic. There  
6  
7  
8 254 was no statistical difference in the odds and risk ratios between both years for mortality rate  
9  
10 255 in NOFF (table 3). The absolute numbers did not change much, but because of a drop in other  
11  
12 256 presentations, the relative percentage of NOFF markedly rose. Hence, the mortality expressed  
13  
14  
15 257 as a percentage of cases is notably higher for all operations, and not necessarily if stripped  
16  
17 258 down to hip fractures alone.  
18  
19 259

### 20 21 260 **Pre- and post-operative morbidity**

22  
23  
24 261 Taking into account that COVID was a peri-operative complication since patients may have  
25  
26 262 been symptomatic with COVID manifestations pre-operatively but only had the swab results  
27  
28  
29 263 return with a positive finding either pre- or post-operatively; the commonest post-operative  
30  
31 264 complication in the COVID period was a hospital-acquired pneumonia but with negative  
32  
33 265 COVID swab results or the decision not to test at all. The second most common post-  
34  
35  
36 266 operative complication in the year 2020 was extra-pulmonary sepsis (Appendix 1). The  
37  
38 267 proportion of post-operative complications had significantly increased when including or  
39  
40 268 excluding COVID as a peri- or post-operative complication in 2020 (0.70% vs. 2.57-4.14%;  
41  
42 269  $p=0.003$ ) with varying odds (3.72-23.4) and risk (3.65-32.6) ratios (table 3). Appendices 2-3  
43  
44  
45 270 focused on the total number and nature of comorbidities within the mortality groups. Multiple  
46  
47 271 contingency chi-square test was insignificant for both number of comorbidities and individual  
48  
49 272 comorbidities between both years, except for cardiovascular and cerebrovascular disease in  
50  
51  
52 273 acute referrals.  
53  
54 274

55  
56 275 *Appendix 1: Post-operative complications for both years*

57  
58  
59 276 *Appendix 2: Type of comorbidities for all mortalities in both years*  
60

277 *Appendix 3: number of comorbidities for all mortalities in both years*

278

279 **Survival probability**

280 6-week Kaplan-Meier survival probability analysis for mortalities between both years were  
281 plotted in figures 8-9. There were similar patterns of survival probability between both  
282 cohorts (i.e. 2019 vs 2020 cumulative). However, the lowest survival probability and the  
283 shortest timeframe were observed in the confirmed COVID positive cohorts (figure 8). 8  
284 (72.7%) patients had femoral trauma, most being neck of femur fractures, distal femur  
285 fracture and a dislocated hip hemiarthroplasty post-fracture. Unexpectedly, there was a  
286 reversal of trends observed for the 6-week Kaplan-Meier survival analysis once admitted and  
287 operated on in figure 9. Mortalities within the pre-COVID period had the lowest survival  
288 probability compared to the post-COVID cohort. The COVID positive mortalities were  
289 observed to have the highest survival probability 11 days prior to converging with those  
290 mortalities without COVID symptoms.

291

292 *Figure 8: Six-week Kaplan-Meier survival probability analysis for mortalities between pre-*  
293 *and post-COVID for acutely referred from the Emergency Department*

294 *Figure 9: Six-week Kaplan-Meier survival probability analysis for mortalities between pre-*  
295 *and post-COVID for those undergoing surgery*

296

## 297 **Discussion**

### 298 *Comment on alternative hypothesis*

299 There was a significant difference between pre- and post-COVID periods at its peak. The  
300 alternative hypothesis was not rejected with respect to prevalence of (i) acute orthopaedic  
301 trauma referrals (reduced by 34%), (ii) surgical interventions (reduced by 29.5%), (iii)  
302 anaesthetic aerosolising-generating procedures, (iv) 6-week mortality rates (more than  
303 doubled in the COVID period), and (v) survival probability between pre- and post-COVID  
304 eras.

305

### 306 *Corroboration of our results with current literature*

307 The 34% reduction in acute trauma referrals is in keeping with previous single centre studies  
308 performed in the UK with results ranging between 26-59%.<sup>10-13,15,16</sup> As described in these  
309 previous studies we would attribute the overall reduction of trauma workload to be due to  
310 reduction in travel and outdoor activities during the national lockdown. MacDonald *et al.*<sup>17</sup>  
311 described a similar effect in their multi-centre study with a reduction of operative workload  
312 by 26.5% compared to 29.5% in our study. Sites recruited for this study confirmed that they  
313 continued to operate at their own facilities during the data collection period whereas some  
314 later used alternative and external facilities including private hospitals through NHS England  
315 pathways (as mentioned by Dayananda *et al.*<sup>18</sup>), which may have impacted nosocomial rates  
316 of COVID, morbidity and mortality. However, this would be difficult to assess since it would  
317 also depend on the diversions of the ambulance services to 'clean' versus 'contaminated'  
318 hospital sites.

319

### 320 *Changes in trends during the peak of COVID*



1  
2  
3 321 With respect to the operative caseload (table 3), patients had half (OR=0.52, p<0.001) the  
4  
5 322 odds of presenting as a trauma call. This was due to the odds ratios of road traffic accidents,  
6  
7 323 sporting injuries, infection, and lower limb injuries were significantly less (by 34-44%;  
8  
9 324 OR=0.56-0.66, p<0.01) during the COVID period. Conversely, there was a significant rise in  
10  
11 325 the odds of neck of femur fractures, falls, the use of anaesthetic AGP and Consultant-led  
12  
13 326 operations; a finding also reflected by Arafa *et al.*<sup>19</sup>  
14  
15  
16  
17 327 Although the expectation was to minimise the use of aerosolising-generating anaesthetic  
18  
19 328 procedures, there was in fact an increased prevalence of using general anaesthesia ± block up  
20  
21 329 to an odds of 75%, in order to create a ‘closed circuit’ for the airways. As the anaesthetic  
22  
23 330 methods was not well documented in the pre-COVID era in a fifth (21.3%) of cases, this  
24  
25 331 skewed the data as it may have been difficult to extract that data from 2019. The odds of a  
26  
27 332 Consultant-led operation doubled (OR=2.08) during the COVID period as a consequence of  
28  
29 333 all elective operations being suspended, hence more Consultants were relocated to trauma  
30  
31 334 theatre and increased pressure within the theatre environments led to Consultant-delivered,  
32  
33 335 rather than Consultant-led care. With respect to surgical procedures, there was a significant  
34  
35 336 reduction in prevalence ratio of open reduction and internal fixation by a fifth (PR=0.81) and  
36  
37 337 removal of metalwork and foreign bodies by three-quarters (PR=0.24), while there was a  
38  
39 338 doubling (PR=2.02) in dynamic hip screw fixation in the COVID era.  
40  
41  
42  
43  
44  
45  
46  
47  
48  
49  
50  
51  
52  
53  
54  
55  
56  
57  
58  
59  
60

### 340 ***Mortality and Morbidity***

341

#### 342 *Mortality during COVID-19 timeframe*

343 Comparatively, the COVIDSurg Collaborative observed a mortality rate of 28.8% (p<0.0001)  
344 of orthopaedic patients who underwent surgery (both elective and trauma) within the first  
345 quarter of the year.<sup>20</sup> The increased mortality during the pandemic is partly due to selection

1  
2  
3 346 of cases that required surgical intervention. The decrease in acute referrals and operations  
4  
5 347 indicated a higher threshold for treatment (due to a redistribution of hospital resources during  
6  
7 348 the pandemic). However, no such case was denied surgery but in the worst-case scenario  
8  
9 349 patients were offered postponed treatment which is acceptable practice (i.e. within 2 weeks).  
10  
11

12 350

### 14 351 *Role of morbidity in mortality during COVID-19*

16 352 Results from figures 5-7 and appendices 1-3 were corroborated with the COVIDSurg  
17  
18 353 publication<sup>20</sup> which confirmed a significant association of mortality with myocardial  
19  
20 354 infarction and congestive heart failure. However, hypertension and stroke/transient ischemic  
21  
22 355 attacks were not significantly associated. In our study, all cardiovascular diseases (including  
23  
24 356 peripheral vascular, arrhythmias, hypertension, heart failure, myocardial infarction and acute  
25  
26 357 coronary syndromes) were combined with cerebrovascular diseases (consisting of strokes and  
27  
28 358 transient ischemic attacks). Unlike their study, our study did not find a significant association  
29  
30 359 with chronic kidney disease, chronic obstructive disease (which included asthma) and  
31  
32 360 dementia in all mortalities during the 2020 timeframe regardless of the COVID status. The  
33  
34 361 differences may stem from that their study looked at the comparison of mortality rates within  
35  
36 362 the same cohort during the COVID era, whereas this study is sub-analysing the entire  
37  
38 363 mortality cohort on its own to observe for specific associations and risks.  
39  
40  
41  
42  
43  
44  
45  
46

47 364

### 48 365 *Survival probability between both years*

49 366 As expected, reduced survival probability reflected the most vulnerable patient profiles,  
50  
51 367 usually with multiple pre- and post-operative comorbidities (appendix 1-3). A reason for a  
52  
53 368 transient increase, and unexpected reversal, in 6-week survival probability in the operative  
54  
55 369 COVID cohort (figures 8-9) may be explained by dedicated wards being ring-fenced to host  
56  
57 370 confirmed COVID positive patients with a heightened care of nursing, medical cover and  
58  
59  
60

1  
2  
3 371 personal protective equipment. Prior to the onset of a possible vaccination, symptomatic  
4  
5 372 management and shielding were the mainstay treatments for COVID positive patients. None  
6  
7  
8 373 of these patients were stepped up to the Intensive Treatment Unit due to being categorised as  
9  
10 374 high-risk stratification for mortality based on age and extent of comorbidities.

11  
12 375

13  
14 376 *Justification of conducting this study*

15  
16  
17 377 As lockdown measures in the UK and globally eases and the incidence of trauma returns to  
18  
19 378 pre-lockdown trends, it is imperative that we understand the true increased risk of mortality  
20  
21 379 in acute trauma during the COVID-19 era. A recent publication by Kader et al.<sup>21</sup> has  
22  
23 380 suggested that the rate of mortality from COVID-19 for elective orthopaedic patients is low;  
24  
25 381 yet this is the first British multi-centre study to quantify mortality risk for trauma patients.  
26  
27 382 Trauma procedures due to the nature of the injuries are necessary and time-critical, and  
28  
29 383 nobody can afford to postpone trauma care even during a global pandemic.<sup>22</sup>

30  
31 384

32  
33  
34  
35 385 Furthermore, the Corona Hands Collaborative<sup>23</sup> published that upper limb trauma patients  
36  
37 386 had SARS-CoV-2 complication rate of 0.18% (n=2) with 0.09% (n=1) overall mortality at  
38  
39 387 the peak of the first wave in April 2020. However, their collaborative looked into a shorter  
40  
41 388 post-operative period (30 vs 42 days) but they agreed that patients who had been hospitalised  
42  
43 389 for a prolonged period before their surgery were at increased risk of both COVID-related and  
44  
45 390 post-operative complications. Most of their patient cohort, who were both younger and fitter  
46  
47 391 than our cohorts, would be classified as the 'walking wounded' and could usually be  
48  
49 392 managed as day-case procedures.

50  
51 393

52  
53  
54  
55 394 Although the trends in mechanisms of injury in our study were reflective of those within a  
56  
57 395 US multi-centre study, there was an opposing trend in the number medical/surgical  
58  
59  
60

1  
2  
3 396 procedures.<sup>24</sup> That could be due to their study encompassing level 1 trauma centres with a  
4  
5 397 mean younger patient population. However, we do agree that with time and from experiential  
6  
7 398 learning, hospitals improved their coping strategies with the pandemic and enhanced patient  
8  
9 399 safety by enforcing personal protection equipment, hosting dedicated theatres for COVID-  
10  
11 400 positive patients, separating sites as clean and contaminated, ringfencing COVID-positive  
12  
13 401 patients to dedicated wards, and promoting routine COVID PCR swabs for all admissions  
14  
15 402 and pre-operative checklists.  
16  
17  
18  
19  
20

21 404 With an overall mortality risk in 2020 doubled that of 2019, clinicians need to counsel  
22  
23 405 patients presenting with acute orthopaedic trauma of the increased risk in the COVID-19 era,  
24  
25 406 especially for those identified as increased risk stratification with multiple underlying  
26  
27 407 comorbidities, elderly and frailty. With the ongoing risk of a subsequent wave and resurgence  
28  
29 408 of COVID-19 cases on top of the inevitable winter pressures, this data is of critical  
30  
31 409 importance in the risk management, decision-making and policymaking of trauma patients  
32  
33 410 both in the UK and across the globe.  
34  
35  
36  
37  
38  
39

#### 40 412 *Neck of femur fractures*

41  
42 413 Since the aetiology of neck of femur fracture is often low energy falls in the home  
43  
44 414 environment, it is not unexpected to observe a consistency of neck of femur fractures in the  
45  
46 415 elderly and the vulnerable during lockdown as seen in figures 1-2. Those with neck of femur  
47  
48 416 fractures remain at greatest risk of mortality and there have been further studies evaluating  
49  
50 417 the risk of COVID-19 on this inherently high-risk cohort.<sup>25-28</sup> COVID-19 itself has been  
51  
52 418 identified as an independent risk factor in increasing mortality in neck of femur fractures.<sup>29,30</sup>  
53  
54  
55  
56  
57  
58  
59  
60

1  
2  
3 420 The increased mortality reflect the increased proportion of NOFF patients that have a higher  
4  
5 421 baseline mortality which has been echoed by the Scottish IMPACT-Restart study.<sup>28</sup> There are  
6  
7 422 several justifications such as reduced help, lack of assistance and staff shortages due to the  
8  
9 423 effect of the national lockdown which required elderly patients to be more independent,  
10  
11 424 unsupervised and at higher risk of falling. Nevertheless, it should be considered that odds of  
12  
13 425 falls may have increased due to prodromal symptoms and clinical manifestations of COVID.  
14  
15  
16

17 426

18  
19 427 If these 'at risk' patients were symptomatic with the virus, then aggressive pre-operative  
20  
21 428 optimisation would occur. Since 91% (n=10) of COVID positive patients had sustained a  
22  
23 429 neck of femur fracture, the National Hip Fracture Database best practice tariff of operating  
24  
25 430 within an ideal 36-hour window set by the Royal College of Physicians was suspended until  
26  
27 431 the patient was stabilised. All hip fracture patients in this cohort were operated on and had  
28  
29 432 dedicated orthogeriatric input commencing from hospital admission. Hence the early peri-  
30  
31 433 operative period and surgery encompassed within the 10-day period post-admission.  
32  
33

34  
35 434 Moreover, neck of femur fractures are recognised as a pre-terminal illness and are known to  
36  
37 435 carry a high risk of mortality in the first month which is trebled in the first year after the  
38  
39 436 injury.<sup>31</sup>  
40  
41

42 437

#### 43 438 ***Strengths and weaknesses of the study and in relation to other studies***

44  
45  
46 439 This was the first representative observational multi-centre study of the UK looking into the  
47  
48 440 impact of COVID-19 pandemic on general trauma and orthopaedic surgical specialty. Studies  
49  
50 441 thus far have only shed light on local scales, cross-speciality, reflecting a fraction of our  
51  
52 442 study population or contain 30-day mortality at most.<sup>10-13,20,30,32,33</sup> Weaknesses included loss  
53  
54 443 of data points which have been accounted for in the tables (i.e. labelled as unknown).  
55  
56

57  
58 444 However this did not affect the final analysis of data points (table 1). Operations conducted  
59  
60

1  
2  
3 445 outside the specific study periods will not account for all those operations required such as  
4  
5 446 for NOFF. It does not suggest that the number of NOFF not accounted for have been  
6  
7 447 managed conservatively (as discovered by Cherevu et al.<sup>34</sup>), since some NOFFs may have  
8  
9 448 breached time to surgery due to medical reasons or being influenced by international  
10  
11 449 guidelines.<sup>35</sup>  
12  
13  
14

15 450

16 451 ***Limitations and future research***

17  
18 452 It is vital to continue exploring the impact of the pandemic on a larger scale. Ideally, more  
19  
20 453 secondary care providers consisting of district general hospitals and major trauma centres  
21  
22 454 will submit data. The diagnosis of COVID was dependent on positive PCR swabs for this  
23  
24 455 study rather than non-specific changes seen on chest CT or plain radiographs. This does not  
25  
26 456 account for false negatives with clinical respiratory symptomatology or true positives in those  
27  
28 457 asymptomatic. Nevertheless, this issue with data has been speculated on in another national  
29  
30 458 study.<sup>23</sup> Data ought to be submitted during the peak of the pandemic as well as at various  
31  
32 459 time intervals as the lockdown measures ease resulting in more freedom of movement while  
33  
34 460 also accounting for the continued risk of subsequent waves and national lockdowns.<sup>36</sup> Further  
35  
36 461 studies will also require to compare the impact of the pandemic on the speciality in the UK  
37  
38 462 compared to other countries on other continents.  
39  
40  
41  
42  
43  
44  
45  
46  
47  
48  
49  
50  
51  
52  
53  
54  
55  
56  
57  
58  
59  
60

1  
2  
3 463 **Conclusion**  
4

5 464 This was the first, longest and largest British multi-centre representation of the impact of  
6  
7 465 COVID-19 pandemic on acute orthopaedic trauma referrals and mortality between mid-  
8  
9 466 March to end-April, representing the peak of the first wave during the lockdown. The  
10  
11 467 mortality rate for acute referrals, as well as those undergoing operative intervention, more  
12  
13 468 than doubled in odds when compared to the same time interval one year ago. The majority of  
14  
15 469 mortalities consisted of the elderly with neck of femur fractures and cardiovascular and/or  
16  
17 470 cerebrovascular diseases. This study will aid clinicians in counselling trauma patients of the  
18  
19 471 increased risk of mortality during the era of COVID-19 and also aid in both healthcare  
20  
21 472 infrastructure, resource allocation, decision-making and policymaking as we continue to  
22  
23 473 battle with the pandemic.  
24  
25  
26  
27  
28  
29  
30  
31  
32  
33  
34  
35  
36  
37  
38  
39  
40  
41  
42  
43  
44  
45  
46  
47  
48  
49  
50  
51  
52  
53  
54  
55  
56  
57  
58  
59  
60

1  
2  
3 474 **Research Ethics Approval - Human Participants:** This study involves human participants  
4  
5 475 but an Ethics Committee(s) or Institutional Board(s) exempted this study. All data points  
6  
7 476 were utilised for routine auditing purposes to reflect departmental activity and service  
8  
9 477 provision without altering clinical care pathways. Each centre contributing data to this study  
10  
11 478 registered their interests with local authority and the auditing or clinical governance  
12  
13 479 departments. No informed consent was required as there was no identifiable data. All data  
14  
15 480 were anonymised at the time of collection and submission. Each patient was assigned a  
16  
17 481 unique identification number which was cross-referenced with the patients' individual  
18  
19 482 hospital identification or medical record numbers. This cross-referenced list remained  
20  
21 483 internally within the hospital trust computer server handled by the contributing team from  
22  
23 484 each trust. The data was transferred and stored using the NHS.net email server which has  
24  
25 485 been approved for transfer of patient data. Data protection compliance was abided by at all  
26  
27 486 times. The lead centre was Imperial College Healthcare NHS Trust where this study was first  
28  
29 487 approved as a clinical audit prior to expanding onto a national scale. All centres gave  
30  
31 488 permission for the use of their data. This study was assessed using the UKRI/MRC/NHS  
32  
33 489 Health Research Authority Ethics Decision Tool and was considered an 'audit/not research';  
34  
35 490 and therefore it was not subject to further ethical review by the NHS Research Ethics  
36  
37 491 Committee (NHS REC).  
38  
39  
40  
41  
42  
43  
44  
45  
46

47 493 **Competing Interests:** None declared

48 494 **Funding:** Nil

49  
50  
51  
52 495  
53  
54 496 **Data availability statement:** Underlying data, code and supporting documentation may be  
55  
56 497 made available as a redacted version to interested parties, subject to the completion of a  
57  
58 498 protocol and signing of a Data Transfer Agreement.  
59  
60



1  
2  
3  
4  
5  
6  
7  
8  
9  
10  
11  
12  
13  
14  
15  
16  
17  
18  
19  
20  
21  
22  
23  
24  
25  
26  
27  
28  
29  
30  
31  
32  
33  
34  
35  
36  
37  
38  
39  
40  
41  
42  
43  
44  
45  
46  
47  
48  
49  
50  
51  
52  
53  
54  
55  
56  
57  
58  
59  
60

499

500 **Acknowledgements:** none

For peer review only

501 **References**

- 502 1. World Health Organization (a). WHO Coronavirus Disease (COVID-19) Dashboard.  
503 Available online at <https://covid19.who.int>. Cited 2021 Sep 12.
- 504 2. Wu F, Zhao S, Yu B, Chen YM, Wang W, Song ZG, et al. A new coronavirus associated  
505 with human respiratory disease in China. *Nature*. 2020;579:265-9.
- 506 3. World Health Organization. Coronavirus disease 2019 (COVID-19): situation report, 66.  
507 26 March 2020. [https://www.who.int/docs/default-source/coronaviruse/situation-](https://www.who.int/docs/default-source/coronaviruse/situation-reports/20200326-sitrep-66-covid-19.pdf?sfvrsn=9e5b8b48_2)  
508 [reports/20200326-sitrep-66-covid-19.pdf?sfvrsn=9e5b8b48\\_2](https://www.who.int/docs/default-source/coronaviruse/situation-reports/20200326-sitrep-66-covid-19.pdf?sfvrsn=9e5b8b48_2). Cited 2021 Aug 30.
- 509 4. Spiteri G, Fielding J, Diercke M, Campese C, Enouf V, Gaymard A, et al. First cases of  
510 coronavirus disease 2019 (COVID-19) in the WHO European Region, 24 January to 21  
511 February 2020. *Eurosurveillance* 2020 (25): 2000178.
- 512 5. UK Government (a) (2020) Oral statement to Parliament, Controlling the spread of  
513 COVID-19: Health Secretary's statement to Parliament. 16 Mar 2020.  
514 [www.gov.uk/government/speeches/controlling-the-spread-of-covid-19-health-secretarys-](http://www.gov.uk/government/speeches/controlling-the-spread-of-covid-19-health-secretarys-statement-to-parliament)  
515 [statement-to-parliament](http://www.gov.uk/government/speeches/controlling-the-spread-of-covid-19-health-secretarys-statement-to-parliament). Cited 2021 Aug 25.
- 516 6. UK Government (b) (2020) Guidance: Oral statement to and away from others (social  
517 distancing). 23 Mar 2020. [https://www.gov.uk/government/publications/full-guidance-on-](https://www.gov.uk/government/publications/full-guidance-on-staying-at-home-and-away-from-others)  
518 [staying-at-home-and-away-from-others](https://www.gov.uk/government/publications/full-guidance-on-staying-at-home-and-away-from-others). Cited 2021 Sept 5.
- 519 7. NHS England (2020a) Next steps on NHS response to COVID-19: Letter from Sir Simon  
520 Stevens and Amanda Pritchard. 17 Mar 2020.  
521 [www.england.nhs.uk/coronavirus/publication/next-steps-on-nhs-response-to-covid-19-](http://www.england.nhs.uk/coronavirus/publication/next-steps-on-nhs-response-to-covid-19-letter-from-simon-stevens-and-amanda-pritchard)  
522 [letter-from-simon-stevens-and-amanda-pritchard](http://www.england.nhs.uk/coronavirus/publication/next-steps-on-nhs-response-to-covid-19-letter-from-simon-stevens-and-amanda-pritchard). Cited 2021 Aug 27.
- 523 8. Royal College of Surgeons. Guidance for surgeons working during the COVID-19  
524 pandemic from the Surgical Royal Colleges of the United Kingdom and Ireland. March

- 1  
2  
3 525 20, 2020. [www.rcseng.ac.uk/coronavirus/joint-guidance-for-surgeons-v1](http://www.rcseng.ac.uk/coronavirus/joint-guidance-for-surgeons-v1). Cited 2021 Aug  
4  
5 526 28.  
6  
7  
8 527 9. British Orthopaedic Association. British Orthopaedic Association for Standards of  
9  
10 528 Trauma (BOAST). Management of patients with urgent orthopaedic conditions and  
11  
12 529 trauma during the coronavirus pandemic. March 24, 2020.  
13  
14 530 [www.boa.ac.uk/resources/statement-for-boa-members-on-trauma-and-orthopaedic-care-](http://www.boa.ac.uk/resources/statement-for-boa-members-on-trauma-and-orthopaedic-care-in-the-uk-during-coronavirus-pandemic.html)  
15  
16 [in-the-uk-during-coronavirus-pandemic.html](http://www.boa.ac.uk/resources/statement-for-boa-members-on-trauma-and-orthopaedic-care-in-the-uk-during-coronavirus-pandemic.html). Cited 2021 Aug 28.  
17  
18  
19 532 10. Park C, Sugand K, Nathwani D, Bhattacharya R, Sarraf KM. Impact of the COVID-19  
20  
21 533 pandemic on orthopaedic trauma workload in a London level 1 trauma centre: the "golden  
22  
23 534 month". Acta Orthop. 2020 Jun 23;1-6.  
24  
25  
26 535 11. Murphy T, Akehurst H, Mutimer J. Impact of the 2020 COVID-19 pandemic on the  
27  
28 536 workload of the orthopaedic service in a busy UK district general hospital. Injury  
29  
30 537 2020;S0020-1383(20)30560-X.  
31  
32  
33 538 12. Elhalawany A, Beastall J, Cousins G. The impact of the COVID-19 lockdown on  
34  
35  
36 539 orthopaedic emergency presentations in a remote and rural population, Bone Joint Open.  
37  
38  
39 540 2020;1(10): 621-627.  
40  
41  
42  
43 541 13. Karia M, Gupta V, Zahra W, et al. The effect of COVID-19 on the trauma burden, theatre  
44  
45  
46 542 efficiency and training opportunities in a district general hospital: planning for a future  
47  
48  
49 543 outbreak, Bone Joint Open. 2020;1-8:494-499.  
50  
51  
52  
53 544 14. Office of National Statistics. Deaths registered weekly in England and Wales,  
54  
55 545 provisional: 27 Aug, 2021. Released 7 Sept, 2021.  
56  
57 546 [www.ons.gov.uk/peoplepopulationandcommunity/birthsdeathsandmarriages/deaths/bullet](http://www.ons.gov.uk/peoplepopulationandcommunity/birthsdeathsandmarriages/deaths/bullet)  
58  
59  
60

- 1  
2  
3  
4 547 <https://www.gov.uk/government/statistics/deaths-registered-weekly-in-england-and-wales-provisional-27-august-2021>. Cited 2021 Sep  
5  
6  
7 548 12.  
8  
9  
10 549 15. Atia F, Pocnetz S, Selby A, et al. The effect of the COVID-19 lockdown on hand trauma  
11  
12  
13 550 surgery utilization. *Bone Jt Open*. 2020;1(10):639-643.  
14  
15  
16 551 16. Esteban PL, Querolt Coll J, Xicola Martínez M, et al. Has COVID-19 affected the  
17  
18  
19 552 number and severity of visits to a traumatology emergency department? *Bone Jt Open*.  
20  
21  
22 553 2020;1(10):617-620.  
23  
24  
25 554 17. MacDonald DRW, Neilly DW, Davies PSE, et al; SCORE authors. Effects of the  
26  
27  
28 555 COVID-19 lockdown on orthopaedic trauma: a multicentre study across Scotland. *Bone*  
29  
30  
31 556 *Jt Open*. 2020;1(9):541-548.  
32  
33  
34 557 18. Dayananda KSS, Mercer ST, Agarwal R, et al. A comparative review of 1,004  
35  
36  
37 558 orthopaedic trauma patients before and during the COVID-19 pandemic. *Bone Jt Open*.  
38  
39  
40 559 2020;1(8):568-575.  
41  
42  
43 560 19. Arafa M, Nesar S, Abu-Jabeh H, et al. COVID-19 pandemic and hip fractures: impact  
44  
45  
46 561 and lessons learned, *Bone Joint Open*. 2020;1-9:530–540.  
47  
48  
49 562 20. COVIDSurg Collaborative. Mortality and pulmonary complications in patients  
50  
51  
52 563 undergoing surgery with perioperative SARS-CoV-2 infection: an international cohort  
53  
54  
55 564 study. *Lancet*. 2020 May 29.  
56  
57  
58 565 21. Kader N, Clement ND, Patel VR, Caplan N, Banaszkiwicz P, Kader D. The theoretical  
59  
60 566 mortality risk of an asymptomatic patient with a negative SARS-CoV-2 test developing  
61  
62  
63  
64  
65  
66  
67  
68  
69  
70 567 COVID-19 following elective orthopaedic surgery. *Bone Joint J*. 2020;1-5.

- 1  
2  
3  
4 568 22. Service BC, Collins AP, Crespo A, Couto P, Gupta S, Avilucea F, et al. Medically  
5  
6  
7 569 necessary orthopaedic surgery during the COVID-19 pandemic: safe surgical practices  
8  
9  
10 570 and a classification to guide treatment. *JBJS*. 2020;102(14):e76.  
11  
12  
13 571 23. Dean BJF; Corona Hands Collaborative. Mortality and pulmonary complications in  
14  
15  
16  
17 572 patients undergoing upper extremity surgery at the peak of the SARS-CoV-2 pandemic in  
18  
19  
20 573 the UK: a national cohort study. *BMJ Qual Saf*. 2020:bmjqs-2020-012156.  
21  
22  
23 574 24. Salottolo K, Caiafa R, Mueller J, et al. Multicenter study of US trauma centres examining  
24  
25  
26  
27 575 the effect of the COVID-19 pandemic on injury causes, diagnoses and procedures.  
28  
29  
30 576 *Trauma Surgery & Acute Care Open*. 2021;6:e000655.  
31  
32  
33 577 25. Kayani B, Onochie E, Patil V, Begum F, Cuthbert R, Ferguson D, et al. The effects of  
34  
35  
36 578 COVID-19 on perioperative morbidity and mortality in patients with hip fractures. *Bone*  
37  
38 579 *Joint J*. 2020;1-10.  
39  
40 580 26. Hall AJ, Clement ND, Farrow L, IMPACT-Scot Study Group, MacLulich AMJ, Dall  
41  
42 581 GF, et al. IMPACT-Scot report on COVID-19 and hip fractures. *Bone Joint J*. 2020;1-10.  
43  
44  
45 582 27. Clement ND, Hall AJ, Makaram NS, et al. IMPACT-Restart: the influence of COVID-19  
46  
47  
48 583 on postoperative mortality and risk factors associated with SARS-CoV-2 infection after  
49  
50  
51 584 orthopaedic and trauma surgery. *Bone Joint J*. 2020;102-B(12):1774-1781.  
52  
53  
54  
55  
56  
57  
58  
59  
60

- 1  
2  
3  
4 585 28. Mackay N, Wilding C, Langley C, et al. The impact of COVID-19 on trauma and  
5  
6  
7 586 orthopaedic patients requiring surgery during the peak of the pandemic. *Bone Jt Open*.  
8  
9  
10 587 2020;1-9:520–529.  
11  
12  
13 588 29. Narang A, Chan G, Aframian A, et al. Thirty-day mortality following surgical  
14  
15  
16  
17 589 management of hip fractures during the COVID-19 pandemic: findings from a  
18  
19  
20 590 prospective multi-centre UK study. *Int Orthop*. 2021;45(1):23-31.  
21  
22  
23  
24 591 30. Karayiannis PN, Roberts V, Cassidy R, Mayne AIW, McAuley D, Milligan DJ, Diamond  
25  
26  
27 592 O. 30-day mortality following trauma and orthopaedic surgery during the peak of the  
28  
29  
30 593 COVID-19 pandemic: a multicentre regional analysis of 484 patients. *Bone Jt Open*.  
31  
32  
33 594 2020;1(7):392-397.  
34  
35  
36  
37 595 31. British Orthopaedic Association. British Orthopaedic Association Standards for Trauma.  
38  
39  
40 596 January 2012. BOAST 1 Version 2 - Patients sustaining a Fragility Hip Fracture.  
41  
42  
43 597 [www.boa.ac.uk/uploads/assets/6750e0bf-4aa3-4680-](http://www.boa.ac.uk/uploads/assets/6750e0bf-4aa3-4680-b1612265704512db/patients%20sustaining%20a%20fragility%20hip%20fracture.pdf)  
44  
45 598 [b1612265704512db/patients%20sustaining%20a%20fragility%20hip%20fracture.pdf](http://www.boa.ac.uk/uploads/assets/6750e0bf-4aa3-4680-b1612265704512db/patients%20sustaining%20a%20fragility%20hip%20fracture.pdf).  
46  
47  
48 599 Cited 2021 Aug 25.  
49  
50  
51 600 32. Greenhalgh M, Dupley L, Unsworth R, Boden R. Where did all the trauma go? A rapid  
52  
53  
54 601 review of the demands on orthopaedic services at a UK Major Trauma Centre during the  
55  
56  
57 602 COVID-19 pandemic. *Int J Clin Pract*. 2021;75(3):e13690.  
58  
59  
60

- 1  
2  
3  
4 603 33. Balakumar B, Nandra RS, Woffenden H, Atkin B, Mahmood A, Cooper G, Cooper J,  
5  
6  
7 604 Hindle P. Mortality risk of surgically managing orthopaedic trauma during the COVID-  
8  
9  
10 605 19 pandemic. *Bone Jt Open*. 2021;2(5):330-336.  
11  
12  
13 606 34. Cheruvu MS, Bhachu DS, Mulrain J, et al. Effect of COVID-19 on a rural orthopaedic  
14  
15  
16  
17 607 hip fracture service. *Bone Jt Open*. 2020;1(8):500-507.  
18  
19  
20 608 35. Lewis PM, Waddell JP. When is the ideal time to operate on a patient with a fracture of  
21  
22  
23 609 the hip? : a review of the available literature. *Bone Joint J*. 2016;98-B(12):1573-1581.  
24  
25  
26  
27 610 36. Adebowale V, Alderson D, Burn W, Dickson J, Godlee F, Goddard A, et al. Covid-19:  
28  
29  
30 611 Call for a rapid forward looking review of the UK's preparedness for a second wave-an  
31  
32  
33 612 open letter to the leaders of all UK political parties [published correction appears in *BMJ*.  
34  
35  
36  
37 613 2020 Jul 16;370:m2866. Dixon, Jeanette [corrected to Dickson, Jeanette]]. *BMJ*.  
38  
39  
40 614 2020;369:m2514. Published 2020 Jun 23.  
41  
42  
43  
44  
45  
46  
47  
48  
49  
50  
51  
52  
53  
54  
55  
56  
57  
58  
59  
60

1  
2  
3  
4 615 **Contributorship statement according to the ICMJE guidelines**

5  
6  
7 616 We have read the ICJME guidelines attentively and have outlined the collaborative  
8  
9  
10 617 contributors below who have all satisfied the criteria to be recognised as a collaborative co-  
11  
12  
13 618 author if this study is published. The core committee of the collaborative consists of KS, AA,  
14  
15  
16 619 CP and KMS who all conceptualised the study, led the  
17  
18  
19 620 planning/investigation/methodology/design, supervised the collaborative contributors' roles,  
20  
21  
22 621 as well as the initial and final version of the manuscript. Additionally, KS (primary author)  
23  
24  
25 622 was also leading data curation, project administration and resource allocation with KMS. KS  
26  
27  
28 623 was also leading on validation. KS, CP and AA led the data analysis and the reporting of the  
29  
30  
31 624 results. All other collaborative members, from the seven centres and outside the core  
32  
33  
34 625 committee, were involved in data curation, formal analysis and in resource allocation  
35  
36  
37 626 internally under consultant supervision (i.e. those with FRCS). Individual contributions from  
38  
39  
40 627 the core committee and every collaborative member has been outlined below:  
41  
42  
43  
44  
45  
46  
47  
48  
49

50 629 **COVERT Collaborative members, their affiliations and extent of contribution**

51  
52  
53 630 **Core Committee**

54 631

| Name | Qualifi-<br>cation | Contribution | E-mail |
|------|--------------------|--------------|--------|
|------|--------------------|--------------|--------|

55  
56  
57  
58  
59  
60



- 1  
2  
3  
4  
5  
6  
7  
8  
9  
10  
11  
12  
13  
14  
15  
16  
17  
18  
19  
20  
21  
22  
23  
24  
25  
26  
27  
28  
29  
30  
31  
32  
33  
34  
35  
36  
37  
38  
39  
40  
41  
42  
43  
44  
45  
46  
47  
48  
49  
50  
51  
52  
53  
54  
55  
56  
57  
58  
59  
60
- |   |                                                                                                                                                                                                                                                                          |      |                                                                                                                                                                                                                                                                                                                                                                                                                                       |                                                                                      |
|---|--------------------------------------------------------------------------------------------------------------------------------------------------------------------------------------------------------------------------------------------------------------------------|------|---------------------------------------------------------------------------------------------------------------------------------------------------------------------------------------------------------------------------------------------------------------------------------------------------------------------------------------------------------------------------------------------------------------------------------------|--------------------------------------------------------------------------------------|
| 1 | <b>Kapil Sugand</b>                                                                                                                                                                                                                                                      | MRCS | <ul style="list-style-type: none"> <li>• Conceptualisation</li> <li>• Data curation</li> <li>• Formal analysis</li> <li>• Investigation</li> <li>• Methodology/Design</li> <li>• Planning</li> <li>• Project administration</li> <li>• Resources</li> <li>• Supervise</li> <li>• Validation</li> <li>• Data analysis</li> <li>• Visualisation</li> <li>• Writing original draft</li> <li>• Writing – reviewing and editing</li> </ul> | <a href="mailto:Ks704@ic.ac.uk">Ks704@ic.ac.uk</a><br><br>ORCID: 0000-0003-3185-954X |
|   | Primary &<br>corresponding<br>author<br><br><i>58 Thames<br/>           Avenue,<br/>           Greenford,<br/>           Middlesex, UB6<br/>           8JN</i><br><br><i>E:</i><br><a href="mailto:ks704@ic.ac.uk">ks704@ic.ac.uk</a><br><br><i>T:</i><br>00447773642813 |      |                                                                                                                                                                                                                                                                                                                                                                                                                                       |                                                                                      |
| 2 | <b>Arash Aframian</b>                                                                                                                                                                                                                                                    | MRCS | <ul style="list-style-type: none"> <li>• Conceptualisation</li> <li>• Formal analysis</li> <li>• Investigation</li> <li>• Methodology/Design</li> <li>• Planning</li> <li>• Supervise</li> <li>• Data analysis</li> <li>• Writing – reviewing and editing</li> </ul>                                                                                                                                                                  | <a href="mailto:arash.aframian@gmail.com">arash.aframian@gmail.com</a>               |
|   |                                                                                                                                                                                                                                                                          |      |                                                                                                                                                                                                                                                                                                                                                                                                                                       | <a href="http://www.ail.com">ail.com</a>                                             |
| 3 | <b>Chang Park</b>                                                                                                                                                                                                                                                        | MRCS | <ul style="list-style-type: none"> <li>• Conceptualisation</li> <li>• Methodology/Design</li> <li>• Planning</li> <li>• Supervise</li> <li>• Data analysis</li> <li>• Writing – reviewing and editing</li> </ul>                                                                                                                                                                                                                      | <a href="mailto:changpark3@gmail.com">changpark3@gmail.com</a>                       |
|   |                                                                                                                                                                                                                                                                          |      |                                                                                                                                                                                                                                                                                                                                                                                                                                       | <a href="http://www.com">com</a>                                                     |
| 4 | <b>Khaled M Sarraf</b><br>(senior author)                                                                                                                                                                                                                                | FRCS | <ul style="list-style-type: none"> <li>• Conceptualisation</li> <li>• Investigation</li> <li>• Methodology/Design</li> <li>• Planning</li> <li>• Project administration</li> <li>• Resources</li> </ul>                                                                                                                                                                                                                               | <a href="mailto:khaled.sarraf@nhs.uk">khaled.sarraf@nhs.uk</a>                       |
|   |                                                                                                                                                                                                                                                                          |      |                                                                                                                                                                                                                                                                                                                                                                                                                                       | <a href="http://www.et">et</a>                                                       |

- Supervise
- Writing – reviewing and editing

632

633

634

### COVERT Collaborators

635

**Affiliation: Department of Trauma and Orthopaedics, Imperial College Healthcare**

636

**NHS Trust, London, W2 1NY, England**

637

|    | <b>Name</b>     | <b>Qualification</b> | <b>Contribution</b>                                                                                                  | <b>E-mail</b>                                                        |
|----|-----------------|----------------------|----------------------------------------------------------------------------------------------------------------------|----------------------------------------------------------------------|
| 5  | Thomas Ashdown  | MRCS                 | <ul style="list-style-type: none"> <li>• Data curation</li> <li>• Formal analysis</li> <li>• Resources</li> </ul>    | <a href="mailto:thomas.ashdown@nhs.net">thomas.ashdown@nhs.net</a>   |
| 6  | Ramla Ali       | MBBS                 | <ul style="list-style-type: none"> <li>• Data curation</li> <li>• Formal analysis</li> <li>• Resources</li> </ul>    | <a href="mailto:ramla.ali@nhs.net">ramla.ali@nhs.net</a>             |
| 7  | William Harland | MBBS                 | <ul style="list-style-type: none"> <li>• Data curation</li> <li>• Formal analysis</li> <li>• Resources</li> </ul>    | <a href="mailto:william.harland@nhs.net">william.harland@nhs.net</a> |
| 8  | Charles Hallett | MBBS                 | <ul style="list-style-type: none"> <li>• Data curation</li> <li>• Formal analysis</li> <li>• Resources</li> </ul>    | <a href="mailto:Ortho@pansurg.org">Ortho@pansurg.org</a>             |
| 9  | Chinmay Gupte   | FRCS                 | <ul style="list-style-type: none"> <li>• Project administration</li> <li>• Resources</li> <li>• Supervise</li> </ul> | <a href="mailto:c.gupte00@ic.ac.uk">c.gupte00@ic.ac.uk</a>           |
| 10 | Dominic Spicer  | FRCS                 | <ul style="list-style-type: none"> <li>• Project administration</li> <li>• Resources</li> <li>• Supervise</li> </ul> | <a href="mailto:dominic.spicer@nhs.net">dominic.spicer@nhs.net</a>   |
| 11 | Robin Strachan  | FRCS                 | <ul style="list-style-type: none"> <li>• Project administration</li> <li>• Resources</li> <li>• Supervise</li> </ul> | <a href="mailto:robin.strachan@nhs.net">robin.strachan@nhs.net</a>   |

|    |                       |      |                                                                                                                      |                                                                                  |
|----|-----------------------|------|----------------------------------------------------------------------------------------------------------------------|----------------------------------------------------------------------------------|
| 12 | Dinesh Nathwani       | FRCS | <ul style="list-style-type: none"> <li>• Project administration</li> <li>• Resources</li> <li>• Supervise</li> </ul> | <a href="mailto:d.nathwani@imperial.ac.uk">d.nathwani@imperial.ac.uk</a>         |
| 13 | Rajarshi Bhattacharya | FRCS | <ul style="list-style-type: none"> <li>• Project administration</li> <li>• Resources</li> <li>• Supervise</li> </ul> | <a href="mailto:rajarshi.bhattacharya@nhs.net">rajarshi.bhattacharya@nhs.net</a> |

638

639 **Affiliation: Department of Trauma and Orthopaedics, Chelsea and Westminster Hospital**640 **NHS Foundation Trust, London, SW10 9NH, England**

|    | Name                    | Qualification | Contribution                                                                                                                                        | E-mail                                                                     |
|----|-------------------------|---------------|-----------------------------------------------------------------------------------------------------------------------------------------------------|----------------------------------------------------------------------------|
| 14 | Catrin Morgan           | MRCS          | <ul style="list-style-type: none"> <li>• Data curation</li> <li>• Formal analysis</li> <li>• Project administration</li> <li>• Supervise</li> </ul> | <a href="mailto:catrin.morgan@nhs.net">catrin.morgan@nhs.net</a>           |
| 15 | Katharine Bennett-Brown | MRCS          | <ul style="list-style-type: none"> <li>• Data curation</li> <li>• Formal analysis</li> <li>• Resources</li> </ul>                                   | <a href="mailto:katebennettbrown@gmail.com">katebennettbrown@gmail.com</a> |
| 16 | Henry Simon             | MRCS          | <ul style="list-style-type: none"> <li>• Data curation</li> <li>• Formal analysis</li> <li>• Resources</li> </ul>                                   | <a href="mailto:henrysimon@hotmail.co.uk">henrysimon@hotmail.co.uk</a>     |
| 17 | Rupen Dattani           | FRCS          | <ul style="list-style-type: none"> <li>• Project administration</li> <li>• Resources</li> <li>• Supervise</li> </ul>                                | <a href="mailto:rupen.dattani@nhs.net">rupen.dattani@nhs.net</a>           |

641

642 **Affiliation: Department of Trauma and Orthopaedics, Queen Elizabeth Hospital,**643 **Gateshead Health NHS Foundation Trust, Gateshead, NE9 6SX, England**

|    | Name        | Qualification | Contribution                                                                                                                   | E-mail                                                       |
|----|-------------|---------------|--------------------------------------------------------------------------------------------------------------------------------|--------------------------------------------------------------|
| 18 | Adham Mousa | MRCS          | <ul style="list-style-type: none"> <li>• Data curation</li> <li>• Formal analysis</li> <li>• Project administration</li> </ul> | <a href="mailto:adham.mousa@nhs.net">adham.mousa@nhs.net</a> |

|    |    |           |             |                                                                        |
|----|----|-----------|-------------|------------------------------------------------------------------------|
| 1  |    |           |             |                                                                        |
| 2  |    |           |             |                                                                        |
| 3  |    |           |             |                                                                        |
| 4  |    |           | • Supervise |                                                                        |
| 5  | 19 | Karen     | MRCS        | • Data curation                                                        |
| 6  |    |           |             | <a href="mailto:karen.vejsbjerg1@nhs.net">karen.vejsbjerg1@nhs.net</a> |
| 7  |    | Vejsbjerg |             | • Formal analysis                                                      |
| 8  |    |           |             | • Resources                                                            |
| 9  |    |           |             |                                                                        |
| 10 | 20 | Michael   | MBBS        | • Data curation                                                        |
| 11 |    |           |             | <a href="mailto:michael.zhang1@nhs.net">michael.zhang1@nhs.net</a>     |
| 12 |    | Zhang     |             | • Formal analysis                                                      |
| 13 |    |           |             | • Resources                                                            |
| 14 |    |           |             |                                                                        |
| 15 | 21 | Vikas     | MBBS        | • Data curation                                                        |
| 16 |    |           |             | <a href="mailto:vikas.kumar7@nhs.net">vikas.kumar7@nhs.net</a>         |
| 17 |    | Kumar     |             | • Formal analysis                                                      |
| 18 |    |           |             | • Resources                                                            |
| 19 |    |           |             |                                                                        |
| 20 | 22 | Hannah    | MBBS        | • Data curation                                                        |
| 21 |    |           |             | <a href="mailto:hannah.emerson2@nhs.net">hannah.emerson2@nhs.net</a>   |
| 22 |    | Emerson   |             | • Formal analysis                                                      |
| 23 |    |           |             | • Resources                                                            |
| 24 |    |           |             |                                                                        |
| 25 | 23 | Andrew    | MBBS        | • Data curation                                                        |
| 26 |    |           |             | <a href="mailto:andrew.oliver2@nhs.net">andrew.oliver2@nhs.net</a>     |
| 27 |    | Oliver    |             | • Formal analysis                                                      |
| 28 |    |           |             | • Resources                                                            |
| 29 |    |           |             |                                                                        |
| 30 | 24 | Callum    | MBBS        | • Data curation                                                        |
| 31 |    |           |             | <a href="mailto:callum.smith8@nhs.net">callum.smith8@nhs.net</a>       |
| 32 |    | Smith     |             | • Formal analysis                                                      |
| 33 |    |           |             | • Resources                                                            |
| 34 |    |           |             |                                                                        |
| 35 | 25 | Andreas   | FRCS        | • Project administration                                               |
| 36 |    |           |             | <a href="mailto:a.hinsche@nhs.net">a.hinsche@nhs.net</a>               |
| 37 |    | Hinsche   |             | • Resources                                                            |
| 38 |    |           |             | • Supervise                                                            |
| 39 |    |           |             |                                                                        |

644

645 **Affiliation: Department of Trauma and Orthopaedics, Darent Valley Hospital,**646 **Dartford and Gravesham NHS Trust, Dartford, DA2 8DA, England**

|    | <b>Name</b> | <b>Qualifi-<br/>cation</b> | <b>Contribution</b> | <b>E-mail</b>                                                            |
|----|-------------|----------------------------|---------------------|--------------------------------------------------------------------------|
| 45 |             |                            |                     |                                                                          |
| 46 |             |                            |                     |                                                                          |
| 47 |             |                            |                     |                                                                          |
| 48 |             |                            |                     |                                                                          |
| 49 | 26          | Markus L                   | MRCS                | • Data curation                                                          |
| 50 |             |                            |                     | <a href="mailto:markus.sagmeister@nhs.net">markus.sagmeister@nhs.net</a> |
| 51 |             | Sagmeister                 |                     | • Formal analysis                                                        |
| 52 |             |                            |                     | • Project administration                                                 |
| 53 |             |                            |                     | • Supervise                                                              |
| 54 |             |                            |                     |                                                                          |
| 55 | 27          | Gihan                      | MRCS                | • Data curation                                                          |
| 56 |             |                            |                     | <a href="mailto:gihan.jayasinghe@nhs.net">gihan.jayasinghe@nhs.net</a>   |
| 57 |             | Jayasinghe                 |                     | • Formal analysis                                                        |
| 58 |             |                            |                     | • Resources                                                              |
| 59 |             |                            |                     |                                                                          |
| 60 |             |                            |                     |                                                                          |

- 1  
2  
3  
4 28 Marissa MBBS • Data curation [marissa.lewis2@nhs.net](mailto:marissa.lewis2@nhs.net)  
5 Lewis • Formal analysis  
6 • Resources  
7  
8 29 Michael MBBS • Data curation [michael.avery@nhs.net](mailto:michael.avery@nhs.net)  
9 Avery • Formal analysis  
10 • Resources  
11  
12

647

648

**Affiliation: Department of Trauma and Orthopaedics, Royal Berkshire NHS**

649

**Foundation Trust, Reading, RG1 5AN, England**

| Name               | Qualification | Contribution                                                                                                                                        | E-mail                                                                   |
|--------------------|---------------|-----------------------------------------------------------------------------------------------------------------------------------------------------|--------------------------------------------------------------------------|
| 30 Tariq Aboelmagd | MRCS          | <ul style="list-style-type: none"> <li>• Data curation</li> <li>• Formal analysis</li> <li>• Project administration</li> <li>• Supervise</li> </ul> | <a href="mailto:taboelmagd@doctors.org.uk">taboelmagd@doctors.org.uk</a> |
| 31 Shireen Ibish   | MRCS          | <ul style="list-style-type: none"> <li>• Data curation</li> <li>• Formal analysis</li> <li>• Resources</li> </ul>                                   | <a href="mailto:shireen.ibish@nhs.net">shireen.ibish@nhs.net</a>         |
| 32 Ruben Thumbadoo | MRCS          | <ul style="list-style-type: none"> <li>• Data curation</li> <li>• Formal analysis</li> <li>• Resources</li> </ul>                                   | <a href="mailto:ruben.thumbadoo@nhs.net">ruben.thumbadoo@nhs.net</a>     |
| 33 Asanka Wijendra | MRCS          | <ul style="list-style-type: none"> <li>• Data curation</li> <li>• Formal analysis</li> <li>• Resources</li> </ul>                                   | <a href="mailto:awijendra@gmail.com">awijendra@gmail.com</a>             |
| 34 Joseph Dixon    | MRCS          | <ul style="list-style-type: none"> <li>• Data curation</li> <li>• Formal analysis</li> <li>• Resources</li> </ul>                                   | <a href="mailto:joedixon@doctors.org.uk">joedixon@doctors.org.uk</a>     |
| 35 Vatsal Gupta    | MRCS          | <ul style="list-style-type: none"> <li>• Data curation</li> <li>• Formal analysis</li> <li>• Resources</li> </ul>                                   | <a href="mailto:vatsalg001@gmail.com">vatsalg001@gmail.com</a>           |

650

651

**Affiliation: Department of Trauma and Orthopaedics, James Cook University Hospital, South**

652

**Tees NHS Foundation Trust, Middlesbrough, TS4 3BW, England**

|    | Name                 | Qualification | Contribution                                                                                                                                        | E-mail                                                             |
|----|----------------------|---------------|-----------------------------------------------------------------------------------------------------------------------------------------------------|--------------------------------------------------------------------|
| 36 | Laura Clifton        | MRCS          | <ul style="list-style-type: none"> <li>• Data curation</li> <li>• Formal analysis</li> <li>• Project administration</li> <li>• Supervise</li> </ul> | <a href="mailto:laura.clifton8@nhs.net">laura.clifton8@nhs.net</a> |
| 37 | Suhib Taher          | MRCS          | <ul style="list-style-type: none"> <li>• Data curation</li> <li>• Formal analysis</li> <li>• Resources</li> </ul>                                   | <a href="mailto:Suhib.taher@nhs.net">Suhib.taher@nhs.net</a>       |
| 38 | Nicholas Jia Jie Wei | MRCS          | <ul style="list-style-type: none"> <li>• Data curation</li> <li>• Formal analysis</li> <li>• Resources</li> </ul>                                   | <a href="mailto:nicholas.wei1@nhs.net">nicholas.wei1@nhs.net</a>   |
| 39 | Emma Reay            | FRCS          | <ul style="list-style-type: none"> <li>• Formal analysis</li> <li>• Resources</li> <li>• Supervise</li> </ul>                                       | <a href="mailto:emma.reay1@nhs.net">emma.reay1@nhs.net</a>         |

653

654

**Affiliation: Department of Trauma and Orthopaedics, Aneurin Bevan University Health Board, Royal Gwent Hospital, Newport, NP20 2UB, Wales**

655

|    | Name                  | Qualification | Contribution                                                                                                                                        | E-mail                                                                                     |
|----|-----------------------|---------------|-----------------------------------------------------------------------------------------------------------------------------------------------------|--------------------------------------------------------------------------------------------|
| 40 | Ashish Khurana        | FRCS          | <ul style="list-style-type: none"> <li>• Data curation</li> <li>• Formal analysis</li> <li>• Project administration</li> <li>• Supervise</li> </ul> | <a href="mailto:ashish.khurana@wales.nhs.uk">ashish.khurana@wales.nhs.uk</a>               |
| 41 | Kathryn Rooney        | MRCS          | <ul style="list-style-type: none"> <li>• Data curation</li> <li>• Formal analysis</li> <li>• Resources</li> </ul>                                   | <a href="mailto:Kathryn.Rooney@wales.nhs.uk">Kathryn.Rooney@wales.nhs.uk</a>               |
| 42 | Nakanda Kakaire       | MRCS          | <ul style="list-style-type: none"> <li>• Data curation</li> <li>• Formal analysis</li> <li>• Resources</li> </ul>                                   | <a href="mailto:nakandamiriam.kakaire@wales.nhs.uk">nakandamiriam.kakaire@wales.nhs.uk</a> |
| 43 | Oluwawye misi Adesina | MRCS          | <ul style="list-style-type: none"> <li>• Data curation</li> <li>• Formal analysis</li> <li>• Resources</li> </ul>                                   | <a href="mailto:quentinpz@yahoo.com">quentinpz@yahoo.com</a>                               |

656



Figure 2: Types and mechanisms of injuries for operative cases

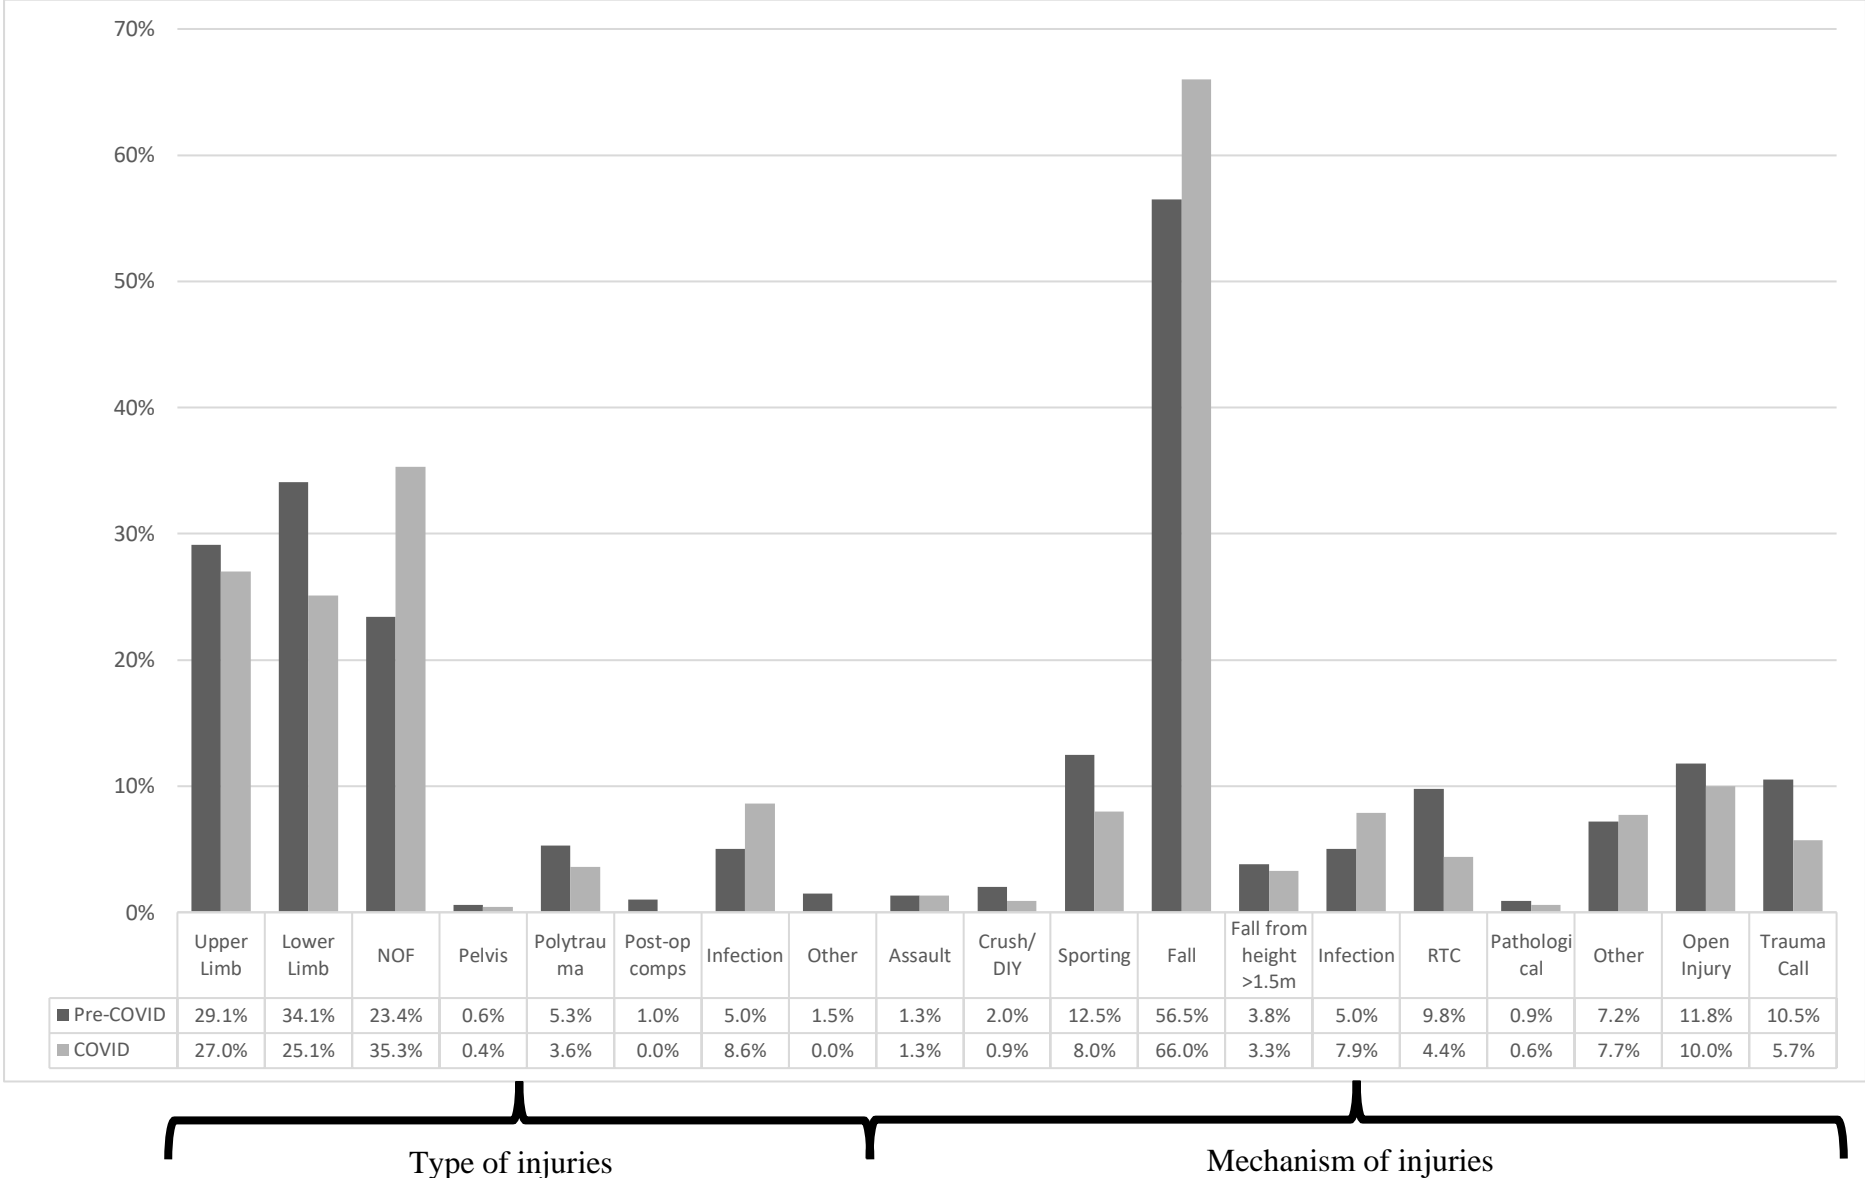



Figure 3: operative and anaesthetic techniques compared between pre- and post-COVID



Type of injuries
Primary surgeon
Anaesthetic technique

1  
2  
3  
4  
5  
6  
7  
8  
9  
10  
11  
12  
13  
14  
15  
16  
17  
18  
19  
20  
21  
22  
23  
24  
25  
26  
27  
28  
29  
30  
31  
32  
33  
34  
35  
36  
37  
38  
39  
40  
41  
42  
43  
44  
45  
46

Figure 4: COVID status of both cohorts including positive results in all mortalities (with 5% error bars)

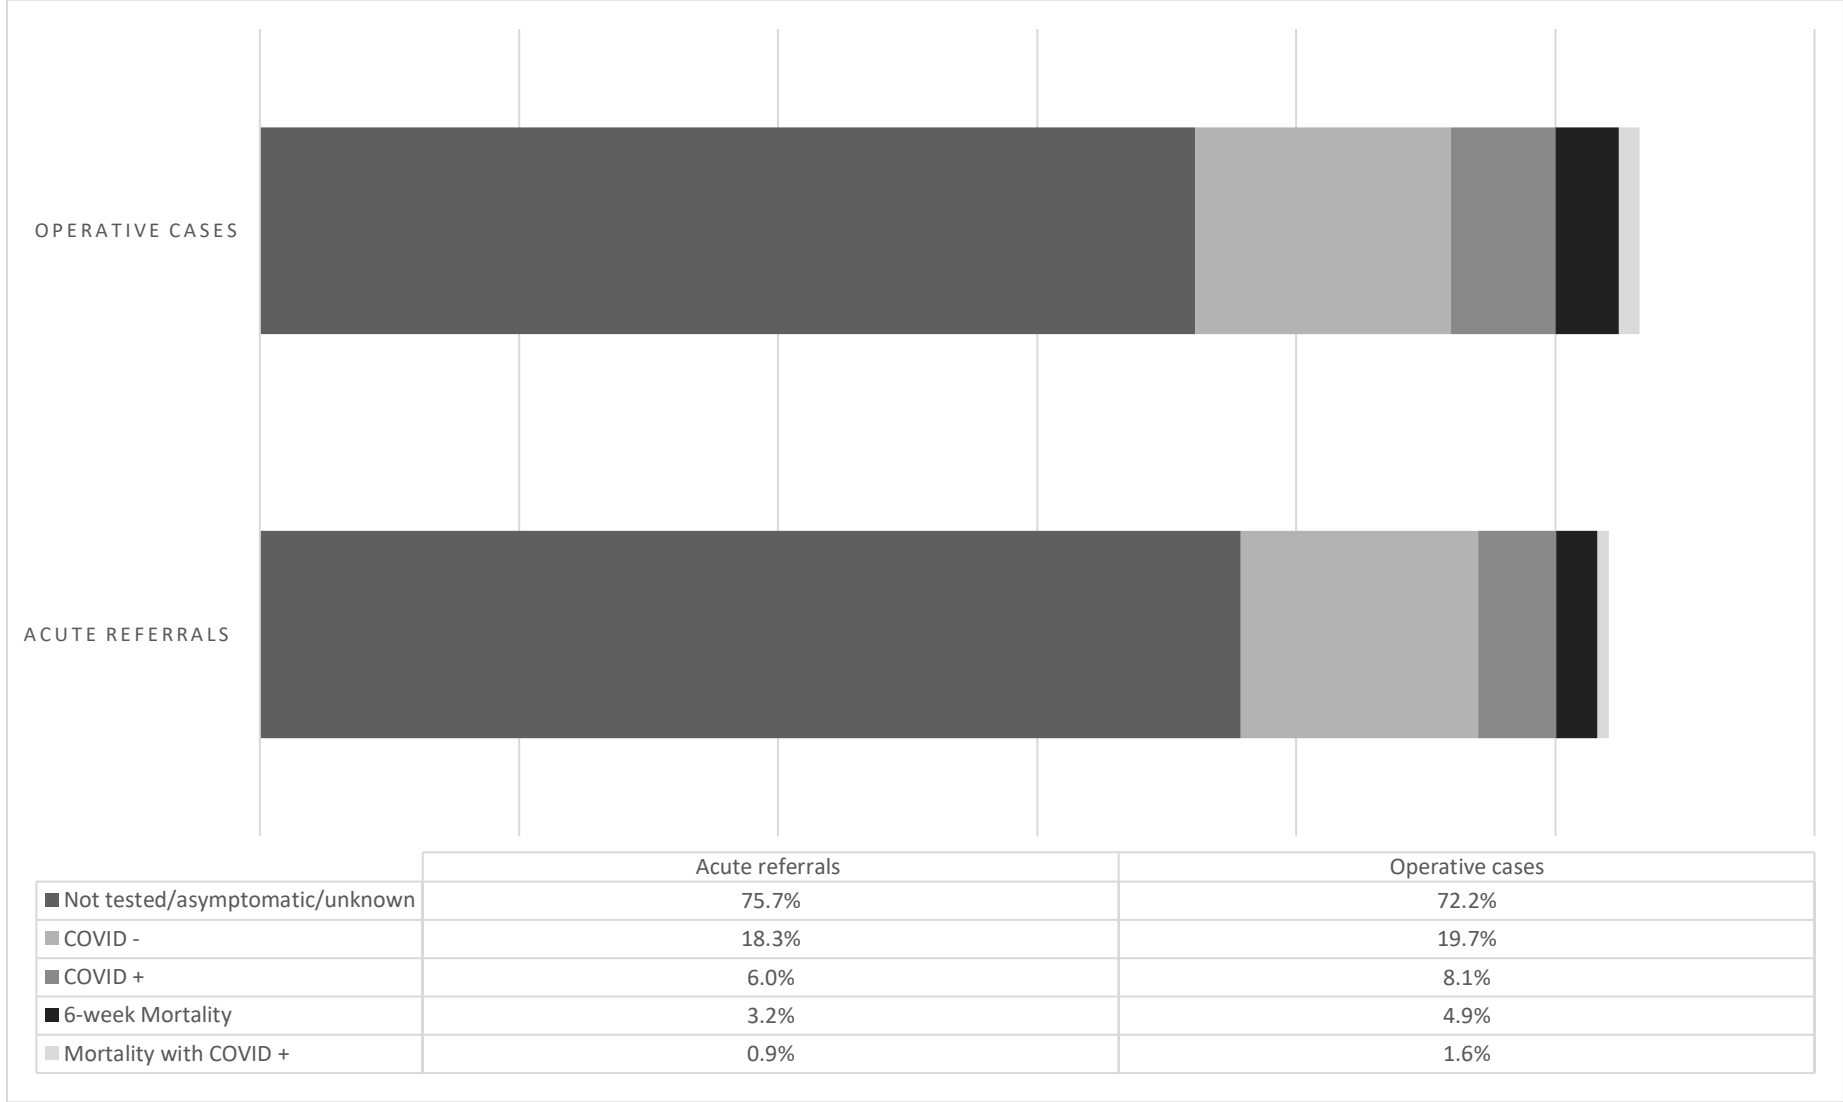

Figure 5: types and mechanism of injury for mortalities in acute referral cohorts



Key: UL: upper limb / LL: lower limb / RTA: road traffic accidents

Figure 6: types and mechanism of injury for mortalities in operative casemix cohorts

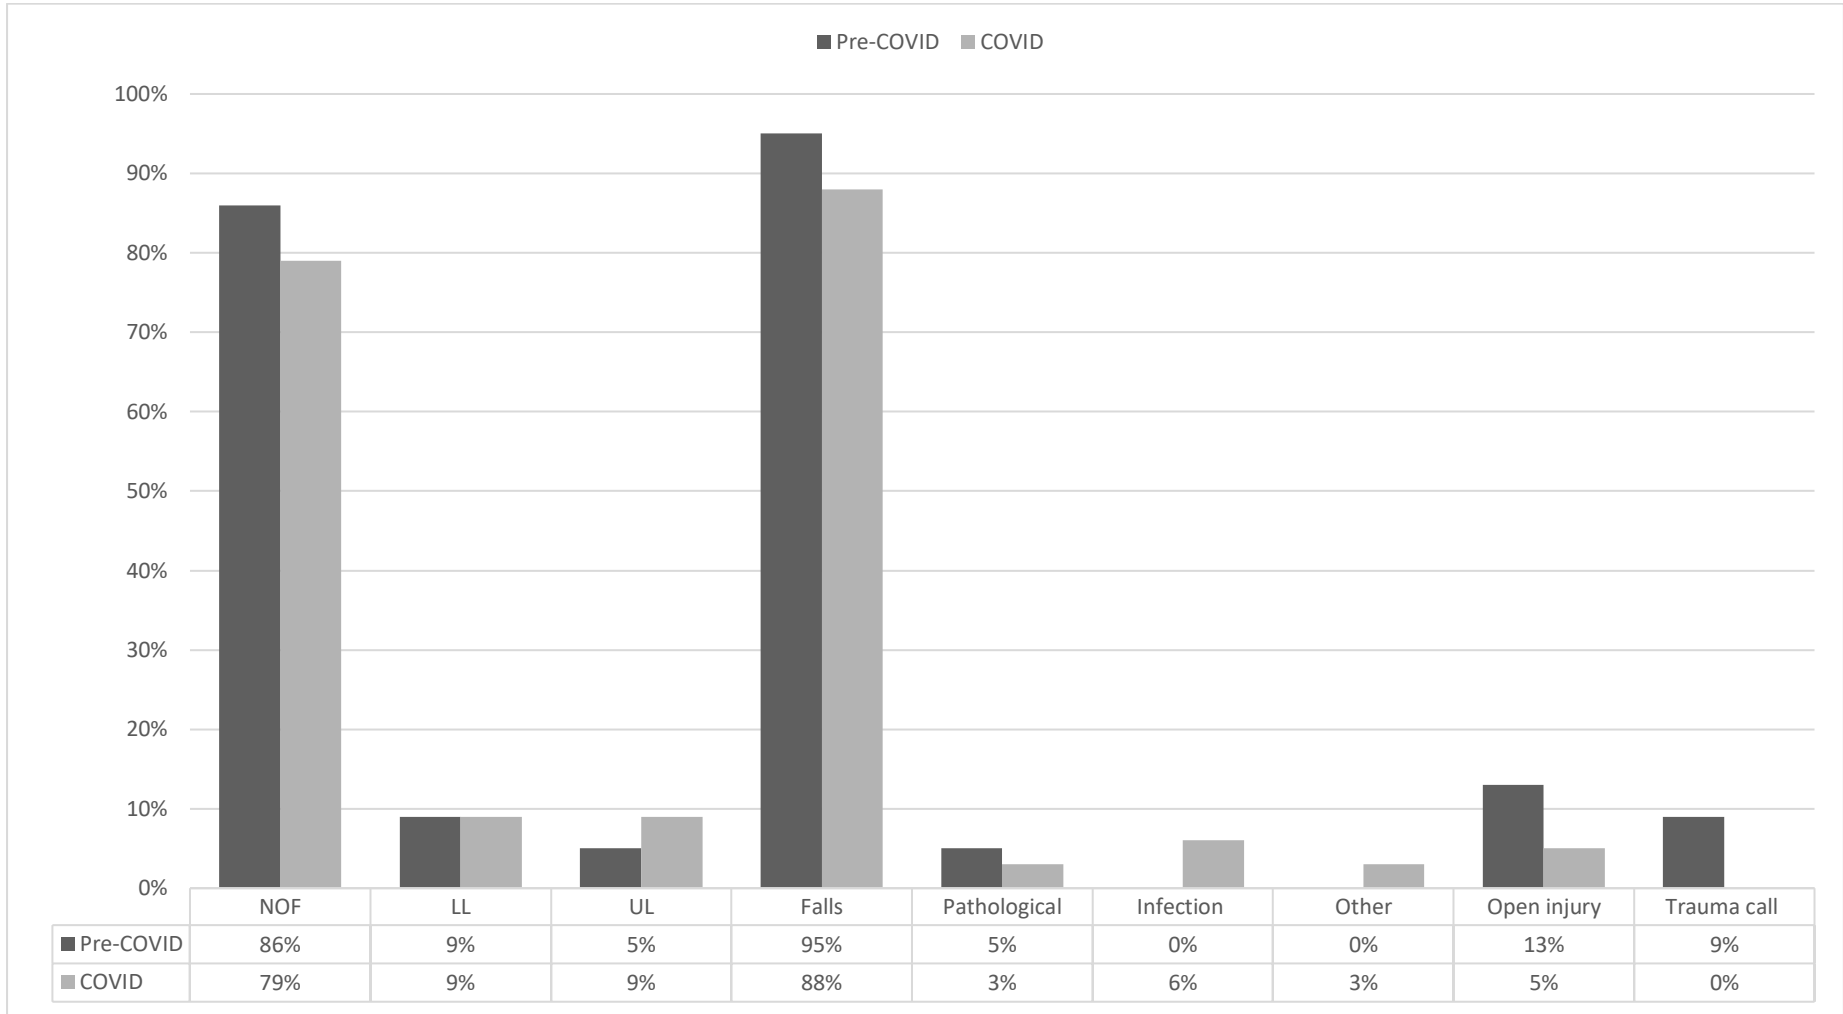

Key: NOF: neck of femur fracture / UL: upper limb / LL: lower limb

Figure 7: Surgical and anaesthetic techniques utilised in mortalities as a means of proportions

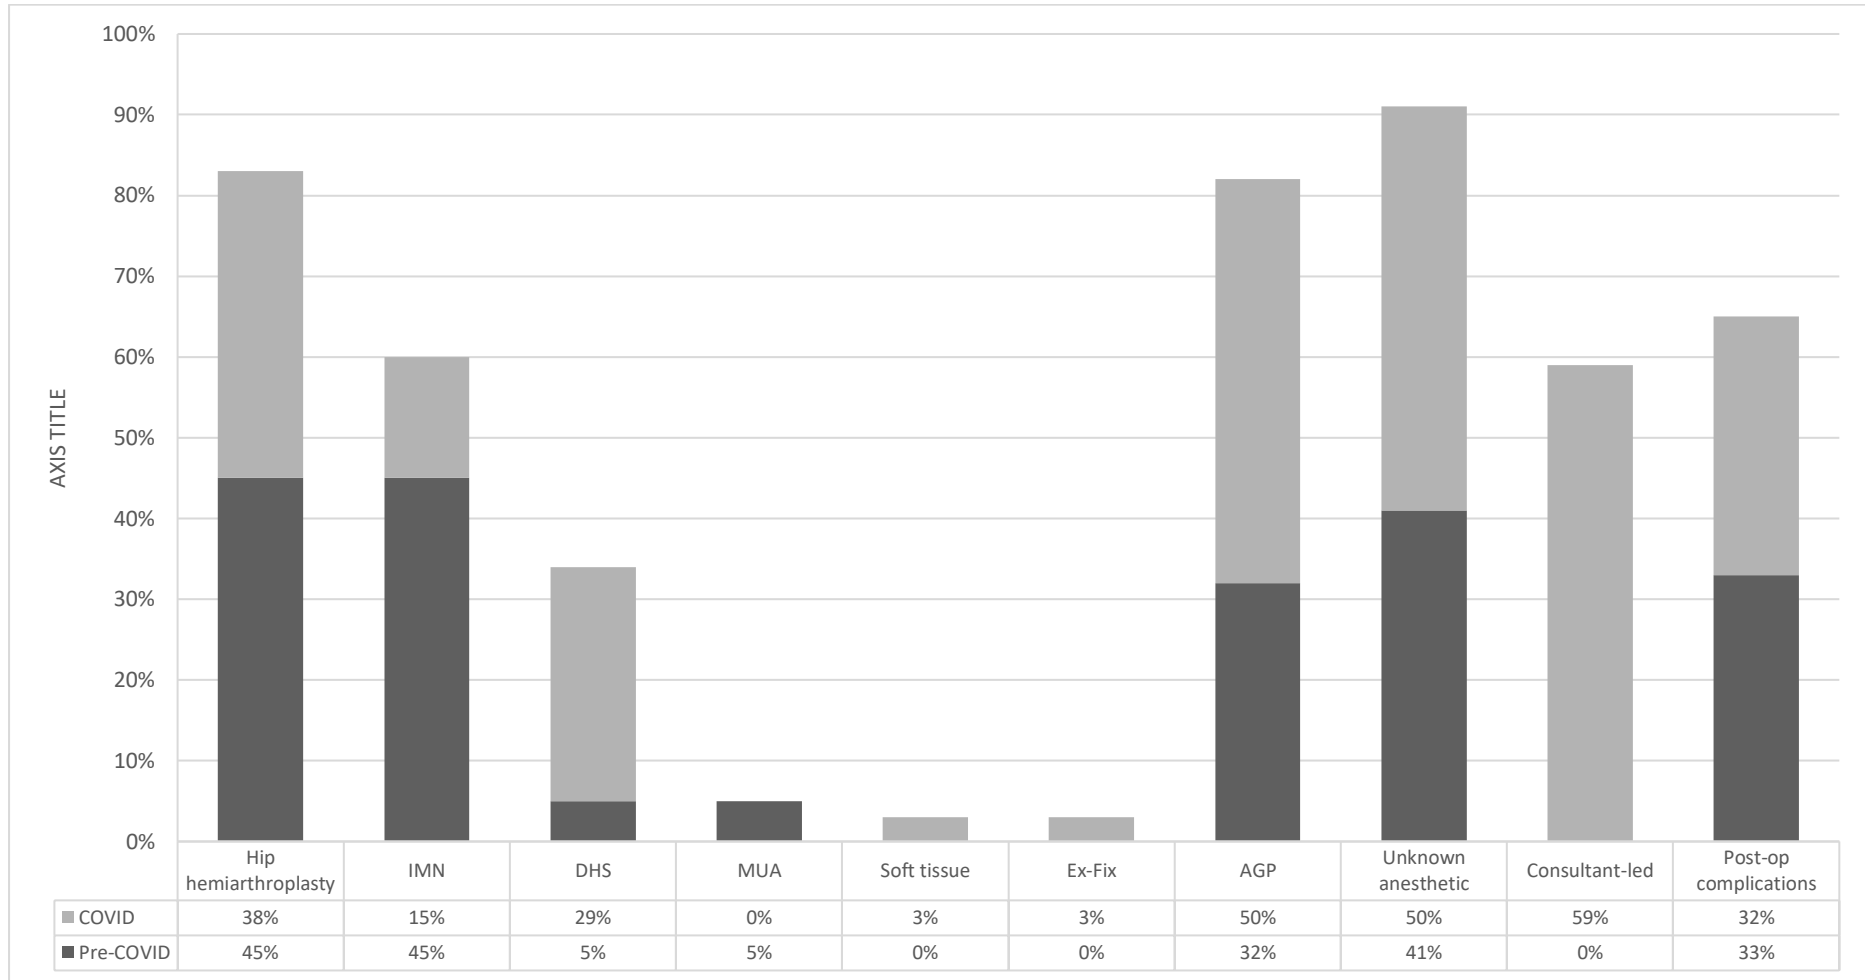

**Key:** IMN: intramedullary nailing / DHS: dynamic hip screw / MUA: manipulation under anaesthesia / Ex-Fix: external fixation / AGP: aerosolizing-generating procedures

Figure 8: Six-week Kaplan-Meier survival probability analysis for mortalities between pre- and post-COVID for acutely referred from the Emergency Department

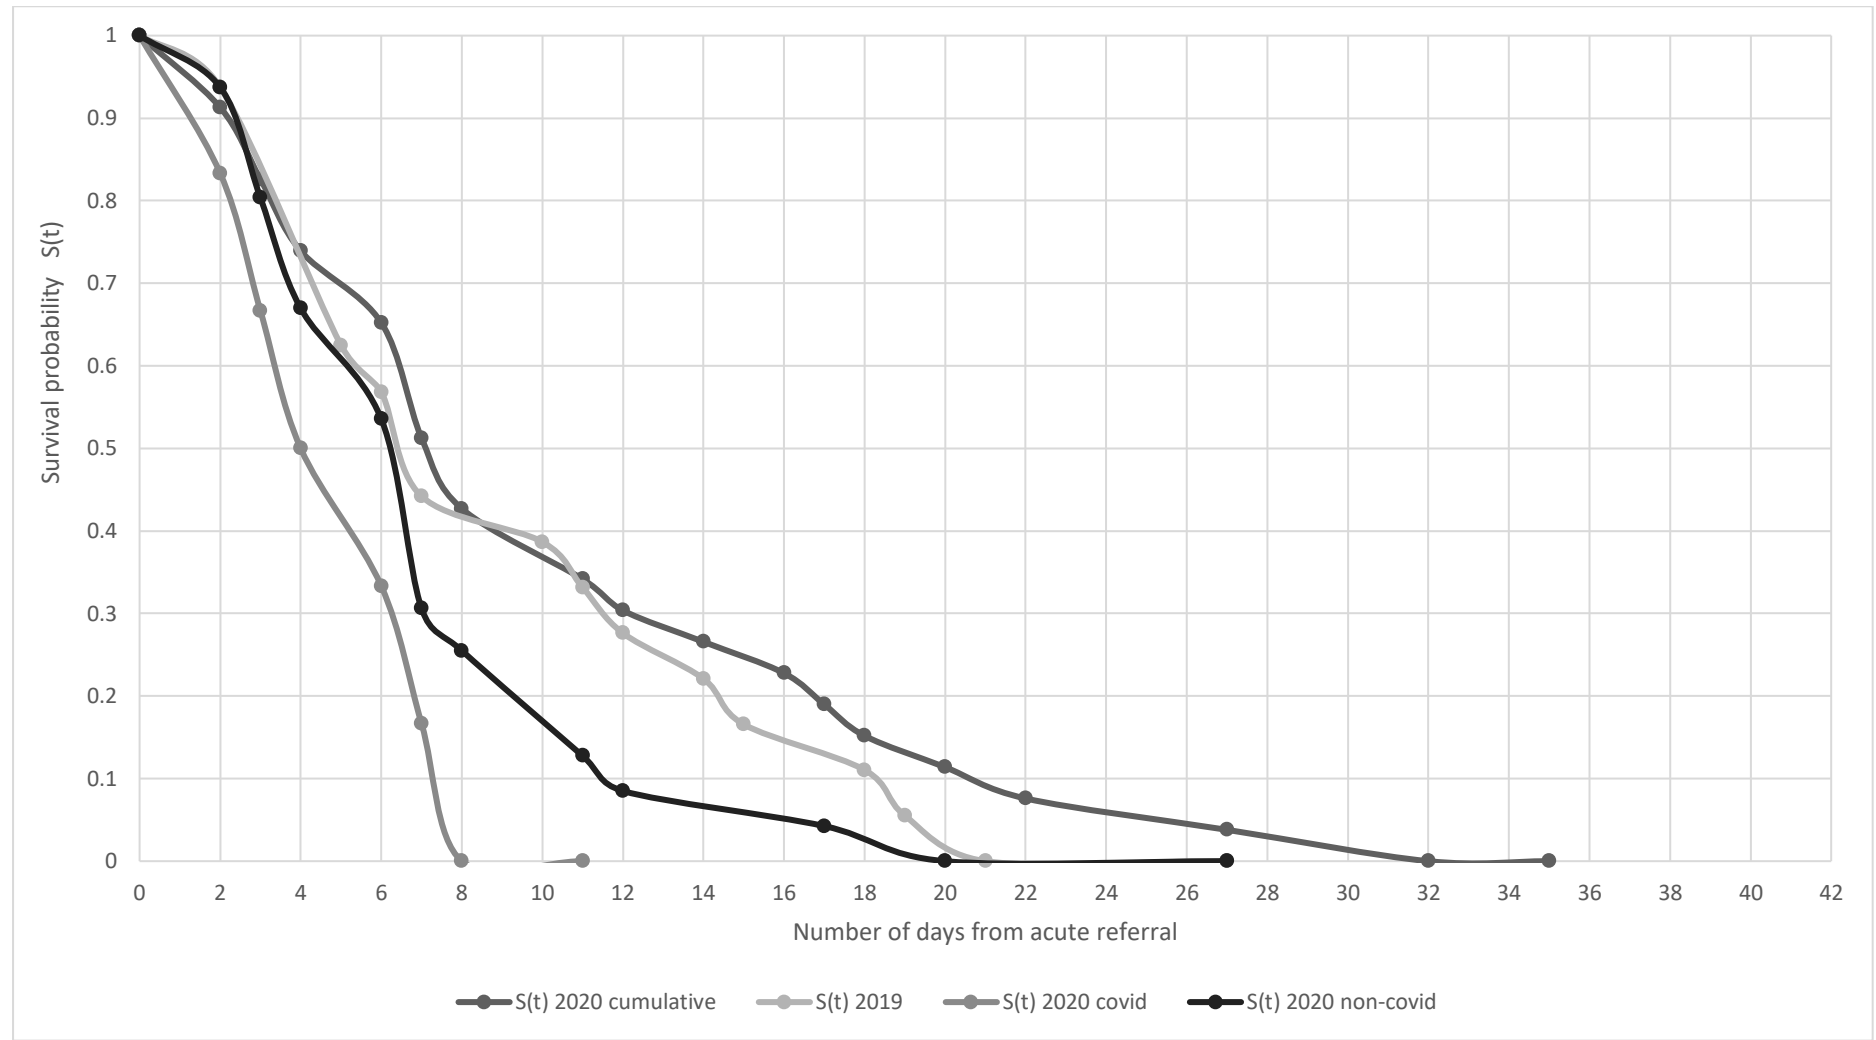

Figure 9: Six-week Kaplan-Meier survival probability analysis for mortalities between pre- and post-COVID for those undergoing surgery

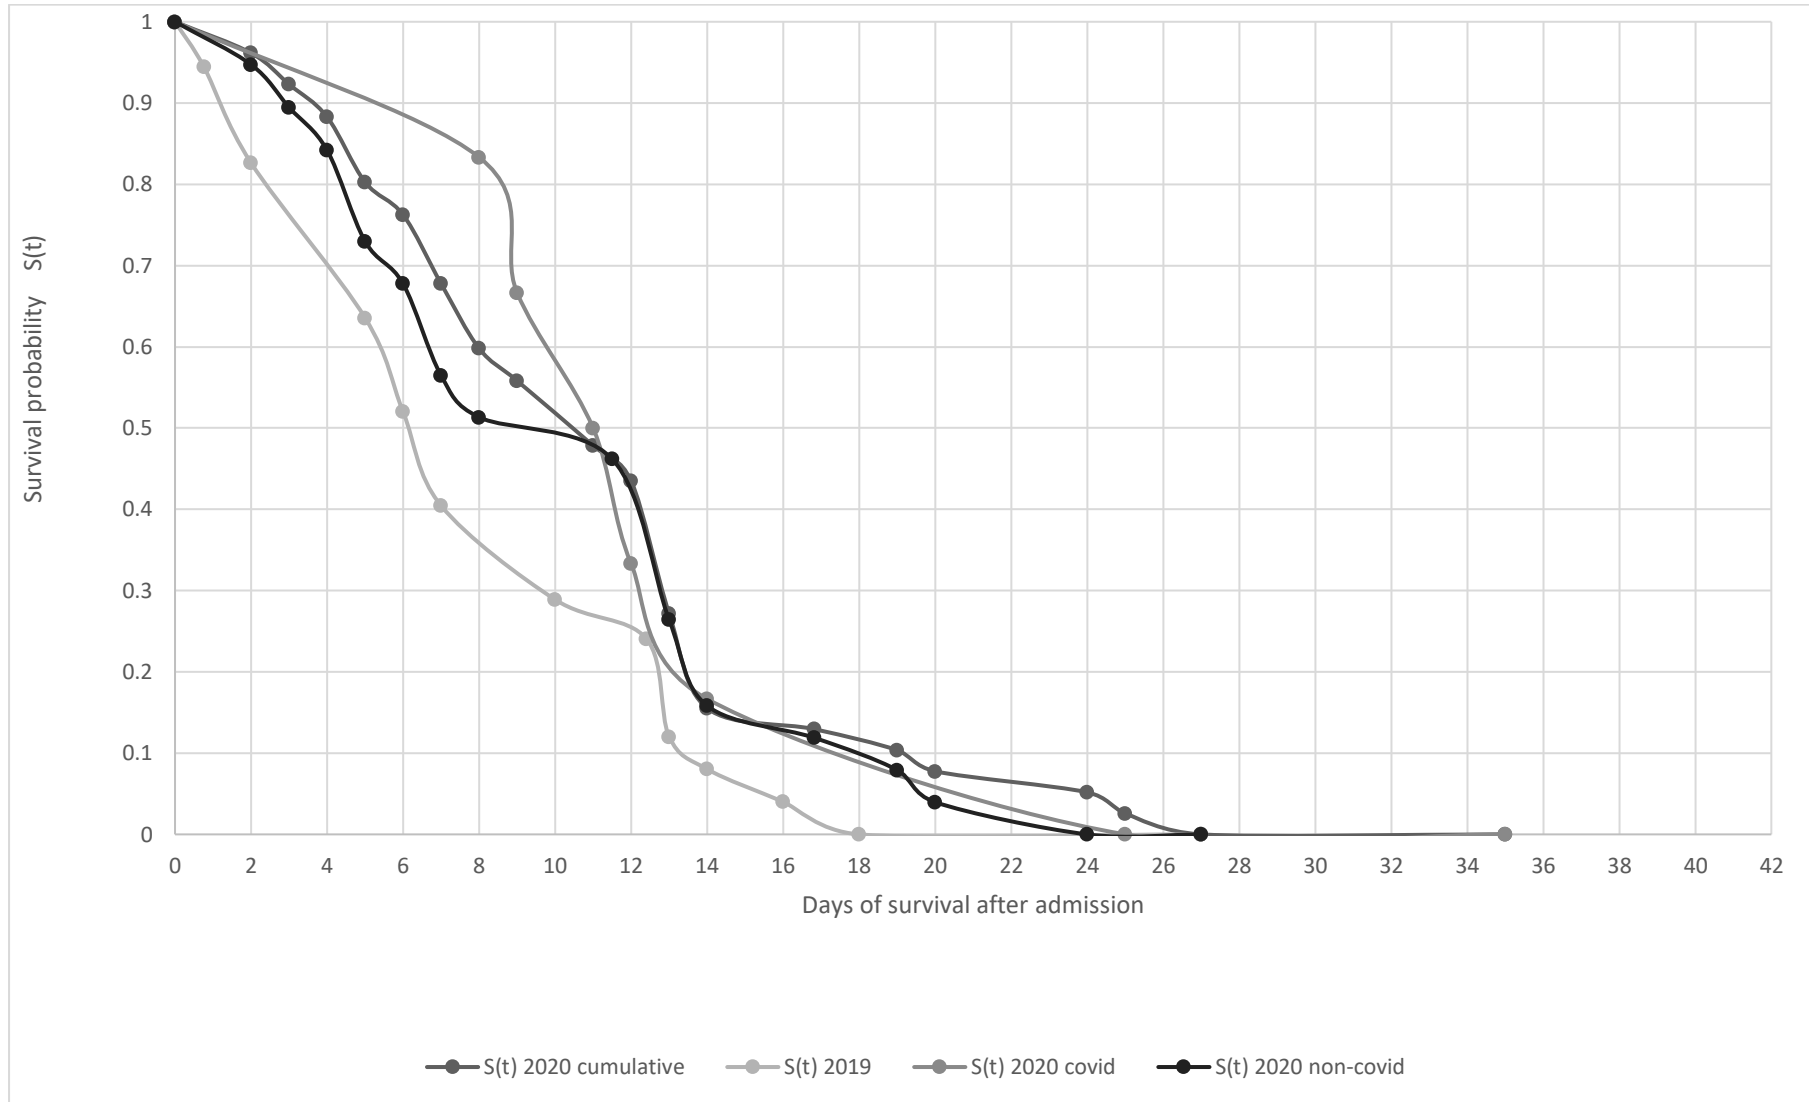

Appendix 1: Post-operative complications for both years

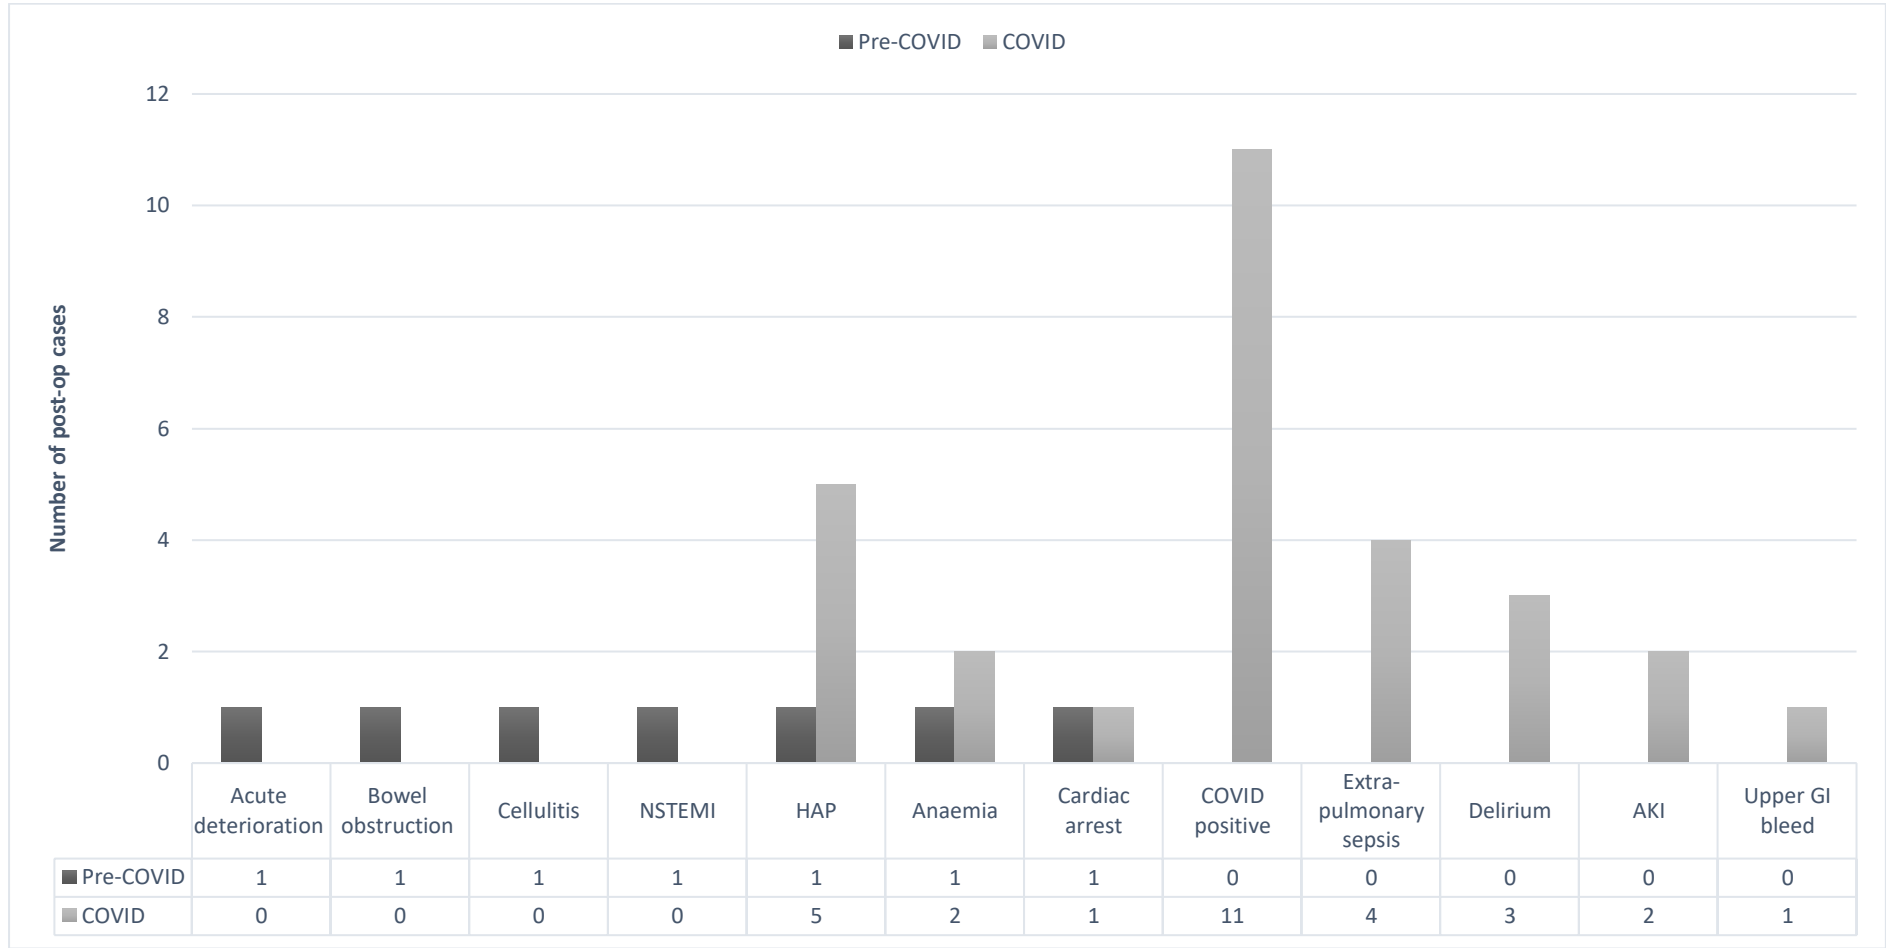

Key: NSTEMI: non-ST elevated myocardial infarction, HAP: hospital-acquired pneumonia, AKI: acute kidney injury, GI: gastrointestinal



Appendix 2: Type of comorbidities for all mortalities relative to both years

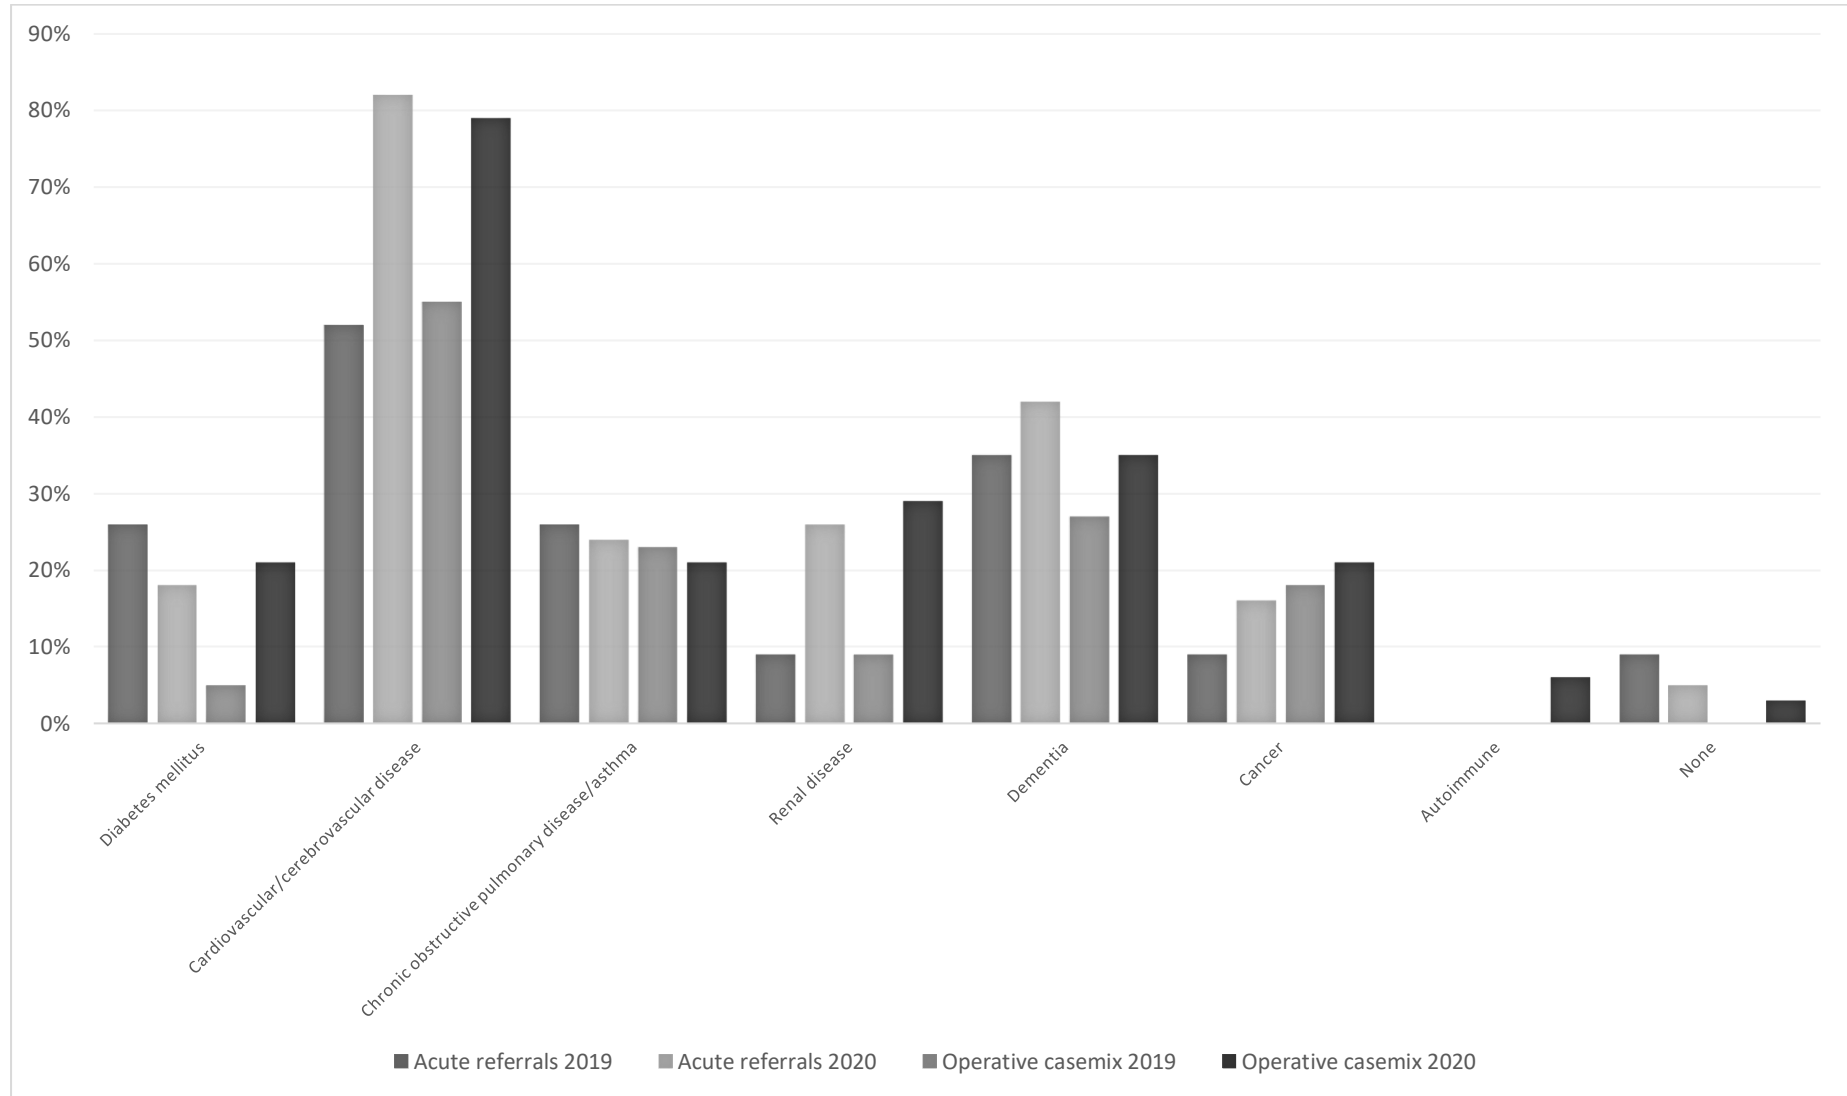

1  
2  
3  
4  
5  
6  
7  
8  
9  
10  
11  
12  
13  
14  
15  
16  
17  
18  
19  
20  
21  
22  
23  
24  
25  
26  
27  
28  
29  
30  
31  
32  
33  
34  
35  
36  
37  
38  
39  
40  
41  
42  
43  
44  
45  
46

Appendix 3: number of comorbidities for all mortalities relative to both years

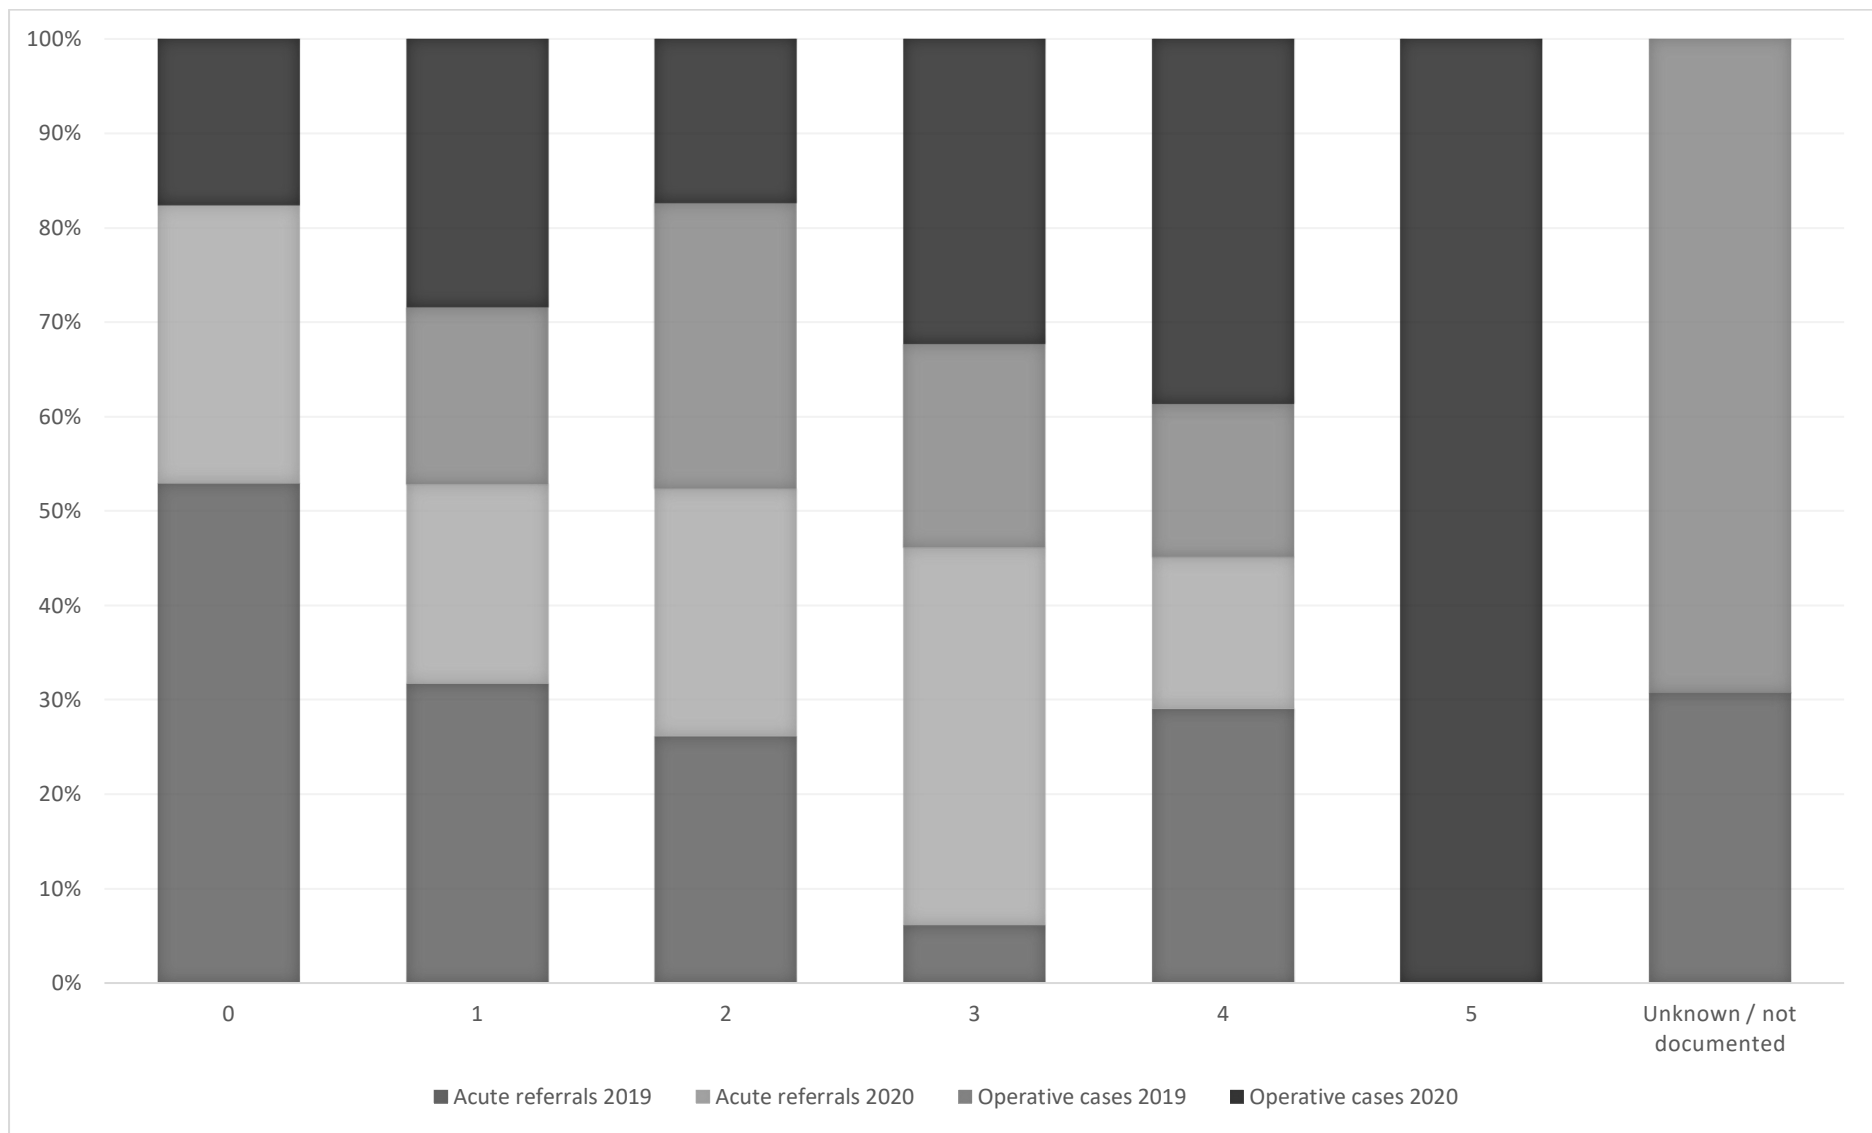

STROBE Statement—Checklist of items that should be included in reports of *cohort studies*

|                           | Item No | Recommendation                                                                                                                                                                                                                                                                                                         | Page No                                    |
|---------------------------|---------|------------------------------------------------------------------------------------------------------------------------------------------------------------------------------------------------------------------------------------------------------------------------------------------------------------------------|--------------------------------------------|
| <b>Title and abstract</b> | 1       | (a) Indicate the study's design with a commonly used term in the title or the abstract<br>(b) Provide in the abstract an informative and balanced summary of what was done and what was found                                                                                                                          | 1, 7-8<br>8                                |
| <b>Introduction</b>       |         |                                                                                                                                                                                                                                                                                                                        |                                            |
| Background/rationale      | 2       | Explain the scientific background and rationale for the investigation being reported                                                                                                                                                                                                                                   | 9-10                                       |
| Objectives                | 3       | State specific objectives, including any prespecified hypotheses                                                                                                                                                                                                                                                       | 10                                         |
| <b>Methods</b>            |         |                                                                                                                                                                                                                                                                                                                        |                                            |
| Study design              | 4       | Present key elements of study design early in the paper                                                                                                                                                                                                                                                                | 11                                         |
| Setting                   | 5       | Describe the setting, locations, and relevant dates, including periods of recruitment, exposure, follow-up, and data collection                                                                                                                                                                                        | 11-12                                      |
| Participants              | 6       | (a) Give the eligibility criteria, and the sources and methods of selection of participants. Describe methods of follow-up<br>(b) For matched studies, give matching criteria and number of exposed and unexposed                                                                                                      | 12<br>12                                   |
| Variables                 | 7       | Clearly define all outcomes, exposures, predictors, potential confounders, and effect modifiers. Give diagnostic criteria, if applicable                                                                                                                                                                               | 11-13<br>Table 1                           |
| Data sources/measurement  | 8*      | For each variable of interest, give sources of data and details of methods of assessment (measurement). Describe comparability of assessment methods if there is more than one group                                                                                                                                   | 11,14                                      |
| Bias                      | 9       | Describe any efforts to address potential sources of bias                                                                                                                                                                                                                                                              | 11-12                                      |
| Study size                | 10      | Explain how the study size was arrived at                                                                                                                                                                                                                                                                              | 11-12                                      |
| Quantitative variables    | 11      | Explain how quantitative variables were handled in the analyses. If applicable, describe which groupings were chosen and why                                                                                                                                                                                           | 11-12,<br>14                               |
| Statistical methods       | 12      | (a) Describe all statistical methods, including those used to control for confounding<br>(b) Describe any methods used to examine subgroups and interactions<br>(c) Explain how missing data were addressed<br>(d) If applicable, explain how loss to follow-up was addressed<br>(e) Describe any sensitivity analyses | 14<br>14<br>29<br>n/a<br>n/a               |
| <b>Results</b>            |         |                                                                                                                                                                                                                                                                                                                        |                                            |
| Participants              | 13*     | (a) Report numbers of individuals at each stage of study—eg numbers potentially eligible, examined for eligibility, confirmed eligible, included in the study, completing follow-up, and analysed<br>(b) Give reasons for non-participation at each stage<br>(c) Consider use of a flow diagram                        | 16<br>Table 2, Figs 1-3<br>16<br>n/a       |
| Descriptive data          | 14*     | (a) Give characteristics of study participants (eg demographic, clinical, social) and information on exposures and potential confounders<br>(b) Indicate number of participants with missing data for each variable of interest<br>(c) Summarise follow-up time (eg, average and total amount)                         | 16<br>Table 2, Figs 1-3<br>Figs 1-4<br>n/a |

|    |                          |     |                                                                                                                                                                                                              |                             |
|----|--------------------------|-----|--------------------------------------------------------------------------------------------------------------------------------------------------------------------------------------------------------------|-----------------------------|
| 1  | Outcome data             | 15* | Report numbers of outcome events or summary measures over time                                                                                                                                               | Tables 2-4, Figures 1-12    |
| 2  |                          |     |                                                                                                                                                                                                              |                             |
| 3  |                          |     |                                                                                                                                                                                                              |                             |
| 4  |                          |     |                                                                                                                                                                                                              |                             |
| 5  |                          |     |                                                                                                                                                                                                              |                             |
| 6  | Main results             | 16  | (a) Give unadjusted estimates and, if applicable, confounder-adjusted estimates and their precision (eg, 95% confidence interval). Make clear which confounders were adjusted for and why they were included | 9-15, Tables 2-4, Figs 1-12 |
| 7  |                          |     | (b) Report category boundaries when continuous variables were categorized                                                                                                                                    | n/a                         |
| 8  |                          |     | (c) If relevant, consider translating estimates of relative risk into absolute risk for a meaningful time period                                                                                             | Table 3                     |
| 9  |                          |     |                                                                                                                                                                                                              |                             |
| 10 |                          |     |                                                                                                                                                                                                              |                             |
| 11 |                          |     |                                                                                                                                                                                                              |                             |
| 12 |                          |     |                                                                                                                                                                                                              |                             |
| 13 |                          |     |                                                                                                                                                                                                              |                             |
| 14 |                          |     |                                                                                                                                                                                                              |                             |
| 15 | Other analyses           | 17  | Report other analyses done—eg analyses of subgroups and interactions, and sensitivity analyses                                                                                                               | 20-21 Table 4 Figs 8-12     |
| 16 |                          |     |                                                                                                                                                                                                              |                             |
| 17 |                          |     |                                                                                                                                                                                                              |                             |
| 18 |                          |     |                                                                                                                                                                                                              |                             |
| 19 |                          |     |                                                                                                                                                                                                              |                             |
| 20 | <b>Discussion</b>        |     |                                                                                                                                                                                                              |                             |
| 21 | Key results              | 18  | Summarise key results with reference to study objectives                                                                                                                                                     | 22-29                       |
| 22 |                          |     |                                                                                                                                                                                                              |                             |
| 23 | Limitations              | 19  | Discuss limitations of the study, taking into account sources of potential bias or imprecision. Discuss both direction and magnitude of any potential bias                                                   | 29-30                       |
| 24 |                          |     |                                                                                                                                                                                                              |                             |
| 25 | Interpretation           | 20  | Give a cautious overall interpretation of results considering objectives, limitations, multiplicity of analyses, results from similar studies, and other relevant evidence                                   | 22-29                       |
| 26 |                          |     |                                                                                                                                                                                                              |                             |
| 27 |                          |     |                                                                                                                                                                                                              |                             |
| 28 | Generalisability         | 21  | Discuss the generalisability (external validity) of the study results                                                                                                                                        | 22-29                       |
| 29 |                          |     |                                                                                                                                                                                                              |                             |
| 30 | <b>Other information</b> |     |                                                                                                                                                                                                              |                             |
| 31 | Funding                  | 22  | Give the source of funding and the role of the funders for the present study and, if applicable, for the original study on which the present article is based                                                | 15                          |
| 32 |                          |     |                                                                                                                                                                                                              |                             |
| 33 |                          |     |                                                                                                                                                                                                              |                             |

34 \*Give information separately for exposed and unexposed groups.

35  
36  
37 **Note:** An Explanation and Elaboration article discusses each checklist item and gives methodological background and published examples of transparent reporting. Information on the STROBE Initiative is available at <http://www.strobe-statement.org>.

38  
39  
40  
41  
42  
43  
44  
45  
46  
47  
48  
49  
50  
51  
52  
53  
54  
55  
56  
57  
58  
59  
60
