# Supplementary material for: Impact of COVID-19 on acute trauma and orthopaedic referrals and surgery in the UK during the first wave of the pandemic: a multicentre observational study from the COVid Emergency-Related Trauma and orthopaedics (COVERT) Collaborative
Source: PubMed Central journal article supplement (PMC8771810; doi:10.1136/bmjopen-2021-054919), 2022-01-18
Supplement: bmjopen-2021-054919supp001.pdf [file bmjopen-2021-054919supp001.pdf]

## Appendix 1: Post-operative complications for both years

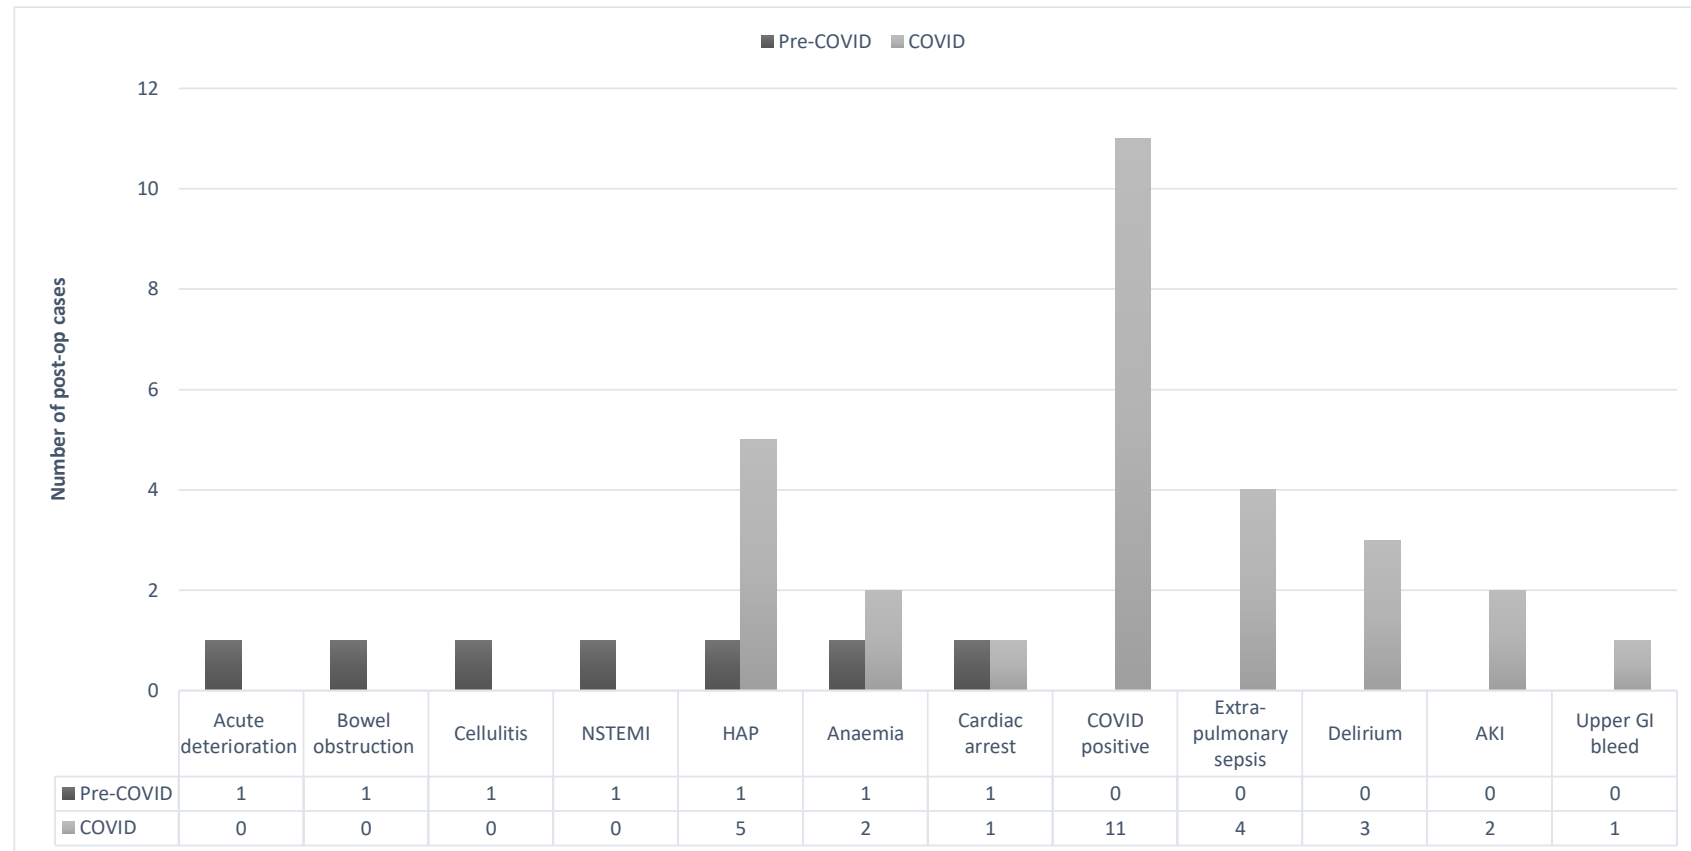

**Key:** NSTEMI: non-ST elevated myocardial infarction, HAP: hospital-acquired pneumonia, AKI: acute kidney injury, GI: gastrointestinal
